# Supplementary material for: Immuno-oncologic profiling by stage-dependent transcriptome and proteome analyses of spontaneously regressing canine cutaneous histiocytoma
Source: PeerJ. 2024 Nov 26;12:e18444. doi: 10.7717/peerj.18444 (PMC11606323; doi:10.7717/peerj.18444)
Supplement: Supplemental Information 4 [file peerj-12-18444-s004.xlsx]

## Sheet: DEG QuantSeq3
2a vs 1					3 vs 2b
Gene	log2(FC)	adjusted p- value			Gene	log2(FC)	adjusted p- value
LOC111098258	7.78369	9.21934e-05			ALOX15B	4.12371	0.0314969
TFPI	4.39825	0.0017224			TMEM229A	2.35162	0.0473497
LOC119876692	3.5778	0.0130219			ANXA8L1	2.18515	0.0217925
NOM1	2.87116	4.60924e-05			TNK1	1.49202	0.0444471
CDK3	2.84984	0.00410316			PTPRF	1.46538	0.0198846
FKBP3	2.79626	0.000649252			DOP1B	1.33848	0.000625166
ST7L	2.65867	0.00266317			TINAGL1	1.00564	0.0491732
THSD7A	2.52813	0.00227738			STXBP4	-1.08961	0.0397704
LOC119864069	2.44256	0.0223347			BIRC3	-1.17487	0.0208018
PPP1R27	2.34708	0.0343895			CSRP2	-1.25925	0.0338146
LOC119869063	2.34507	0.0338667			TRIM34	-1.29981	0.0338146
CCDC171	2.26385	0.00770819			LOC102155634	-1.33743	0.0193608
GAPDH	2.2493	0.0134712			MYH7B	-1.69644	0.0338146
MAOA	2.21011	0.0457475			LOC102156243	-2.27469	2.05638e-08
CPE	2.14732	0.0281154			CDCA7L	-3.13373	0.000533721
LOC111098018	2.11327	0.0127816			TAF15	-3.29811	0.00424355
LOC102156332	2.10663	0.00571694
NME1	2.08049	0.0132963
LOC489252	2.06344	0.000417311
LOC119866970	2.00228	0.0285541
LYZ	1.99006	0.0455337
LOC612587	1.97376	0.0200305
LOC119879300	1.93307	0.019018
PLEC	1.92995	3.35508e-06
LOC119868024	1.90109	0.0247833
BRD8	1.8711	0.0115664
DLA-79	1.86761	0.00973935
DDX52	1.85229	2.32096e-05
TCF7L2	1.83193	0.000417311
SCX	1.82635	0.0378453
LMNB1	1.81626	0.00426305
LOC119871388	1.80708	0.00709755
ST13	1.77776	0.000480001
NR3C1	1.74355	0.00326579
PLCE1	1.73329	0.0139212
RAB1A	1.73151	0.00586663
UBN2	1.71219	9.21934e-05
IQGAP1	1.6904	3.04346e-06
LOC102153227	1.68953	0.00143044
LOC111097402	1.67914	0.0399707
HSPD1	1.67637	0.0183724
SET	1.67604	3.39404e-06
LRRC71	1.67594	0.0405992
TNFRSF11A	1.66613	0.0074422
SPECC1L	1.66056	0.00577797
HNRNPC_2	1.64605	0.00223454
LOC100856137	1.64148	0.00240394
EBP	1.61695	0.0343558
ARID5B	1.61634	6.52868e-06
SYCP2	1.61476	0.00148511
CXCL10	1.60072	0.0173932
LOC119874670	1.59843	0.0385422
SHISAL1	1.58549	0.0030008
ASPM	1.58172	0.000649252
SMARCA2	1.57965	1.04235e-05
STAU2	1.5588	0.000286976
SHTN1	1.55675	0.00861101
ATP13A3	1.55256	0.000870633
TNRC18	1.54372	2.05684e-05
TNFSF10	1.5427	0.00302559
ATM	1.53954	0.011296
LOC102156760	1.53572	0.00311567
THEM4	1.52094	0.0197727
RPS6KA5	1.51225	0.00133068
UTRN	1.50893	1.817e-05
GRAMD1B	1.50221	0.0094093
PDE9A	1.49729	0.0460372
LOC119876090	1.49493	0.0166234
RPL4	1.46577	0.000649252
FMN1	1.45585	0.0106535
CYBB	1.45481	0.0246848
LOC119877534	1.45249	0.00133259
TMTC3	1.44961	9.2644e-05
TGFB2	1.44887	0.00619205
NOC3L	1.44326	0.00619205
SERPINE1	1.44045	0.0291387
RARS1	1.4357	0.000390308
AKAP8	1.4296	0.0082591
DIAPH3	1.42039	0.013436
CDC73	1.413	0.0132823
LOC119863874	1.40313	0.0231004
UBE2N	1.40083	0.00879874
LOC119871705	1.37965	0.0374649
PDIA3	1.37569	5.25783e-06
LOC102156563	1.37506	0.00240394
LOC106558650	1.37447	0.000372594
CBLB	1.36607	0.0158062
EGR2	1.36399	0.00619205
LOC119870566	1.36255	0.00619205
ARHGAP35	1.34815	0.0105833
CENPF	1.34376	0.000522019
DDX59	1.3385	0.00867462
ZNF618	1.33557	0.0496534
CD38	1.3322	0.0316588
LOC106557777	1.33078	0.0391963
HMMR	1.32788	0.019018
TRAF5	1.32272	0.0130334
NVL	1.31778	0.0115502
HYOU1	1.30041	0.047924
SNX6	1.29902	0.0175801
LOC111090723	1.29583	0.0082591
HSP90AB1	1.29499	1.817e-05
CENPE	1.29072	0.000435157
PGRMC1	1.28802	0.0271495
SETD2	1.28312	0.000649252
LOC119879477	1.28298	0.000149656
DLA-DRA	1.27354	0.0125519
EPB41	1.26901	0.00389147
KCNK6	1.26247	0.00674601
ATAD5	1.261	0.0012044
PRKDC	1.25966	0.0019772
LOC102154724	1.25651	0.0258594
EHBP1	1.24692	0.0158766
ETV6	1.24623	8.23181e-05
GALNT6	1.24067	0.0313673
CFAP251	1.24	0.0285823
APBB1IP	1.22178	0.00226686
RAB8A	1.20807	0.0300706
EIF3L	1.19725	0.0379188
LOC119865018	1.18931	0.0082591
POLD2	1.18519	0.0165284
LOC102155141	1.18062	0.0112036
AKAP9	1.17949	0.000132578
CEP135	1.17897	0.00302559
ZFP41	1.17757	0.0289652
CIP2A	1.17565	0.000818867
BHLHE41	1.16606	0.0109101
TMC8	1.1656	0.0374649
UGCG	1.15388	9.2644e-05
PTPN2	1.15003	0.000446739
DCAF13	1.14143	0.0338534
ALDOA	1.14004	0.0165302
TSR1	1.13483	0.0137159
NKTR	1.13317	0.000126606
CCDC18	1.12758	0.00564615
JAK2	1.12713	0.00534543
UBA6	1.12641	0.0258594
KNTC1	1.1256	0.0469404
MTBP	1.12206	0.0132479
ZMYM4	1.11891	0.00619205
MPHOSPH8	1.11782	0.0105738
USP34	1.11716	0.0195711
CWC15	1.11601	0.000137623
SPCS2	1.11158	0.0353374
TRAPPC3L	1.10968	0.0249147
TIMP2_5	1.10531	0.0171311
MIER1	1.09938	0.000137623
MLLT10	1.09496	0.0268135
ATP5PO	1.09397	0.00165887
ACTN1	1.09192	0.00134433
MITD1	1.08441	0.0207326
FTSJ3	1.08389	0.00149536
PUF60	1.08319	0.0125409
TRAF3	1.07837	0.0042331
EIF5B	1.07796	3.04346e-06
CENPJ	1.07763	0.00861452
LOC119878057	1.07138	0.0385883
ATRX	1.07066	0.000286976
CASP4	1.07041	0.0229055
BAZ1B	1.06654	5.79847e-05
ZC3HAV1	1.06478	0.00311567
CEP295	1.06453	0.000390308
RAD54L2	1.06356	0.014546
KIF20B	1.05981	0.00277753
CEP290	1.05904	0.00890433
IMP3	1.05606	0.00133068
GOLGB1	1.05587	8.23181e-05
LENG8	1.0551	8.92159e-05
NOP14	1.05313	0.00294081
TMEM150B	1.04714	0.0299863
PPIG	1.04557	4.88152e-05
UPF2	1.04221	0.000259342
LGALS8	1.04142	0.000490478
LOC100856727	1.04104	0.0231004
CBX3	1.03853	0.0195711
DTX3L	1.03795	0.00738712
THOC1	1.03357	0.0197727
ZBTB1	1.03341	0.0290551
AMDHD2	1.02601	0.0190146
ZNF217	1.02484	0.00502424
TMED3	1.02306	0.0177582
ZFP36	1.02293	0.00212356
BOD1L1	1.02024	0.000178381
ELAVL1	1.01974	0.0385883
CEP89	1.01881	0.0353374
MED14	1.01185	0.0253617
MSH6	1.00901	0.0333612
RAD50	1.00897	0.00102801
INCENP	1.0077	0.040671
ZFC3H1	1.00751	3.04346e-06
GIGYF2	1.00199	0.00110573
LPAR1	-1.00574	0.0106484
ABI3BP	-1.02001	0.030455
PYGO1	-1.02578	0.0464809
FHL1	-1.03061	0.0299863
GOLGA7	-1.04047	8.10187e-05
LOC119869674	-1.04516	0.0239423
ZMAT3	-1.05719	0.0137159
ACP3	-1.06113	0.0073007
NQO1	-1.07586	0.0289689
MYH11	-1.07978	0.0469404
OLFML1	-1.09316	0.00328477
EPDR1	-1.09506	0.0243185
XG	-1.10529	0.00137139
PLAC9	-1.12612	0.0239906
HSPB1	-1.12996	0.00134433
MCAM	-1.13334	0.0184042
DDR1	-1.14482	0.0466145
IRX3	-1.19307	0.0285541
F2RL2	-1.20641	0.0192467
C9H17orf58	-1.23066	0.0394952
GAS6	-1.25803	0.0172714
PPT2	-1.26552	0.000648778
CHL1	-1.27999	0.0334794
GPR153	-1.28377	0.0114809
ME1	-1.28925	0.0074422
GJA1	-1.3056	0.00424499
LOC106557731	-1.31016	0.00601515
PPL	-1.34139	0.0223048
H2BC21	-1.3591	0.0106517
DGAT2	-1.35996	0.00946878
NECTIN1	-1.36527	0.00748156
CRABP2	-1.39657	0.0281154
NIBAN3	-1.39886	0.0434913
CDNF	-1.41551	0.0468892
CD244	-1.43496	0.00950114
JUP	-1.44532	0.00802575
CES1	-1.49312	0.0497885
MPIG6B	-1.49437	0.0434292
TNK1	-1.52707	0.016377
FGF2	-1.53614	0.00619205
S100A16	-1.53986	0.0108221
ANXA8L1	-1.56821	0.0306232
PDZK1IP1	-1.57038	0.0359459
FAM89A	-1.58265	0.0468759
LAMTOR2	-1.59766	0.014336
GPX3	-1.64373	0.0320733
NKAIN1	-1.6555	0.0199649
ARL4D	-1.65552	0.0218989
LRAT	-1.72864	0.0399707
CSTA	-1.79824	0.0173932
LOC100855449	-1.93638	0.00125955
CYS1	-2.02387	0.00422538
ESRP2	-2.10282	0.0215085
LOC119873228	-2.15805	0.00571694
F13A1	-2.16468	0.000432996
PON3	-2.51584	0.00571694
TNFAIP8L3	-2.868	0.000644924
ADTRP	-4.65499	0.012807
