# Supplementary material for: Immuno-oncologic profiling by stage-dependent transcriptome and proteome analyses of spontaneously regressing canine cutaneous histiocytoma
Source: PeerJ. 2024 Nov 26;12:e18444. doi: 10.7717/peerj.18444 (PMC11606323; doi:10.7717/peerj.18444)
Supplement: Supplemental Information 6 [file peerj-12-18444-s006.xlsx]

## Sheet: Tumor cell enriched
Tumor cell enriched areas
1 vs 2														1 vs 3														2 vs 3
ROC_T1vsT2	Protein Hit Number	MALDI_mass	ESI_mass	Distance	Protein Accession		Protein name	Protein Description	Protein Score	Peptide Sequence	Peptide Scan	Stage		ROC_T1vsT3	Protein Hit Number	MALDI_mass	ESI_mass	Distance	Protein Accession		Protein name	Protein Description	Protein Score	Peptide Sequence	Peptide Scan	Stage		ROC_T2vsT3	Protein Hit Number	MALDI_mass	ESI_mass	Distance	Protein Accession		Protein name	Protein Description				Protein Score	Peptide Sequence	Peptide Scan	Stage
0.119	657	837.456	837.417	0.0394	A0A8C0QET2	CANLF	Transmembrane protein 256	Transmembrane protein 256 OS=Canis lupus familiaris OX=9615 GN=TMEM256 PE=3 SV=1	131	AGFGAAFR	G2B	2		0.276	657	837.456	837.417	0.0394	A0A8C0QET2	CANLF	Transmembrane protein 256	Transmembrane protein 256 OS=Canis lupus familiaris OX=9615 GN=TMEM256 PE=3 SV=1	131	AGFGAAFR	G2B	2		0.089	21	839.455	839.49	0.0351	A0A8C0RU77	CANLF	Transketolase	Transketolase OS=Canis lupus familiaris OX=9615 GN=TKT PE=4 SV=1				3805	LAVGEVPR	G3A	3
0.178	247	964.45	964.466	0.0163	A0A8C0N999	CANLF	60S ribosomal protein L4	60S ribosomal protein L4 OS=Canis lupus familiaris OX=9615 GN=RPL4 PE=3 SV=1	388	MLNTDLSR	G2B	2		0.282	6	780.458	780.42	0.0381	A0A8P0TN04	CANLF	PDZ domain-containing protein	PDZ domain-containing protein OS=Canis lupus familiaris OX=9615 GN=AHNAK PE=4 SV=1	8719	FSVPGFK	G1A	1		0.118	589	1406.63	1406.68	0.0483	A0A8C0MQK3	CANLF	60S ribosomal protein L27	60S ribosomal protein L27 OS=Canis lupus familiaris OX=9615 PE=3 SV=1				150	VYNYNHLMPTR	G3B	3
0.179	147	1346.63	1346.61	0.0198	A0A8C0QNL8	CANLF	40S ribosomal protein S3a	40S ribosomal protein S3a OS=Canis lupus familiaris OX=9615 GN=RPS3A PE=3 SV=1	615	LMELHGEGSSSGK	G2A	2		0.287	141	785.458	785.478	0.02	A0A8C0QPV2	CANLF	RRM domain-containing protein	RRM domain-containing protein OS=Canis lupus familiaris OX=9615 PE=4 SV=1	628	ANLSLLR	G2B	2		0.123	626	1119.64	1119.58	0.0603	A0A8C0PGL3	CANLF	Complement C2	Complement C2 OS=Canis lupus familiaris OX=9615 GN=CFB PE=4 SV=1				137	LKNEDLEFL	G3B	3
0.181	13	988.449	988.574	0.1245	A0A8C0TQ44	CANLF	Histone H4	Histone H4 OS=Canis lupus familiaris OX=9615 GN=LOC483167 PE=3 SV=1	6181	VFLENVIR	G1A	1		0.29	155	874.454	874.48	0.026	A0A8C0M9E2	CANLF	AE binding protein 1	AE binding protein 1 OS=Canis lupus familiaris OX=9615 PE=4 SV=1	592	TNAISEIK	G1A	1		0.123	52	867.454	867.478	0.0234	A0A8C0NK63	CANLF	Pyruvate kinase	Pyruvate kinase OS=Canis lupus familiaris OX=9615 GN=PARP6 PE=3 SV=1				1637	MQHLIAR	G1A	1
0.182	20	965.45	965.492	0.0414	A0A8C0PB64	CANLF	Annexin	Annexin OS=Canis lupus familiaris OX=9615 GN=ANXA1 PE=3 SV=1	3981	AMVSEFLK	G3A	3		0.298	405	1080.45	1080.51	0.0611	A0A8C0PF16	CANLF	Transferrin-like domain-containing protein	Transferrin-like domain-containing protein OS=Canis lupus familiaris OX=9615 GN=LTF PE=3 SV=1	233	YFGYTGAFR	G3B	3		0.131	682	840.455	840.485	0.0302	A0A8C0MRB7	CANLF	Neutrophil cytosolic factor 4	Neutrophil cytosolic factor 4 OS=Canis lupus familiaris OX=9615 PE=4 SV=1				123	ALAQQLR	G3B	3
0.184	250	987.449	987.489	0.0399	A0A8C0T1Z7	CANLF	ATPase H+ transporting V1 subunit E1	ATPase H+ transporting V1 subunit E1 OS=Canis lupus familiaris OX=9615 GN=ATP6V1E1 PE=3 SV=1	385	ALSDADVQK	G2A	2																0.14	853	1120.64	1120.59	0.0556	A0A8C0NLV0	CANLF	SH3 domain containing GRB2 like, endophilin B1	SH3 domain containing GRB2 like, endophilin B1 OS=Canis lupus familiaris OX=9615 PE=4 SV=1				88	LAADAGTFLSR	G2B	2
0.195	317	989.449	989.495	0.046	A0A7R6QAQ7	CANLF	DLA class II antigen	DLA class II antigen OS=Canis lupus familiaris OX=9615 PE=2 SV=1	78	SFDPQGALR	G3B	3		0.745	63	1241.64	1241.65	0.0111	A0A6S4Q8B0	CANLF	DLA class I alpha chain	DLA class I alpha chain OS=Canis lupus familiaris OX=9615 GN=DLA88 PE=3 SV=1	1228	TFKETAQVYR	G2A	2		0.158	51	2131	2130.99	0.0064	A0A8C0NPN5	CANLF	14-3-3 domain-containing protein	14-3-3 domain-containing protein OS=Canis lupus familiaris OX=9615 PE=3 SV=1				1678	TAFDEAIAELDTLSEESYK	G2B	2
0.198	385	974.45	974.524	0.0733	A0A8C0MPB4	CANLF	Dynactin subunit 2	Dynactin subunit 2 OS=Canis lupus familiaris OX=9615 GN=DCTN2 PE=3 SV=1	244	YADLPGIAR	G2A	2		0.718	111	1215.64	1215.63	0.0108	A0A8C0PLW8	CANLF	60S ribosomal protein L7a	60S ribosomal protein L7a OS=Canis lupus familiaris OX=9615 GN=RPL7A PE=3 SV=1	835	NFGIGQDIQPK	G3A	3		0.158	651	2130	2130.11	0.1108	A0A8C0NH53	CANLF	Septin 6	Septin 6 OS=Canis lupus familiaris OX=9615 GN=SEPTIN6 PE=3 SV=1				131	TAAELLQSQGSQAGGSQTLKR	G1A	1
0.202	7	1347.63	1347.62	0.0109	A0A8C0MNE2	CANLF	Myosin-9	Myosin-9 OS=Canis lupus familiaris OX=9615 GN=MYH9 PE=3 SV=1	8891	DELADEIANSSGK	G3B	3		0.733	831	1192.64	1192.64	0.0001	A0A8C0P1Y0	CANLF	Dihydrolipoyl dehydrogenase	Dihydrolipoyl dehydrogenase OS=Canis lupus familiaris OX=9615 GN=DLD PE=3 SV=1	91	VGKFPFAANSR	G3A	3		0.191	1384	953.451	953.463	0.0123	A0A8C0MY31	CANLF	Calumenin	Calumenin OS=Canis lupus familiaris OX=9615 GN=CALU PE=4 SV=1				41	EQFVEFR	G1B	1
0.209	19	863.454	863.454	0.0004	A0A8C0PLP5	CANLF	Plectin	Plectin OS=Canis lupus familiaris OX=9615 GN=PLEC PE=4 SV=1	4148	FAEQTLR	G3A	3		0.732	30	1216.64	1216.63	0.0115	A0A8C0MIT4	CANLF	78 kDa glucose-regulated protein	78 kDa glucose-regulated protein OS=Canis lupus familiaris OX=9615 PE=3 SV=1	3033	DAGTIAGLNVMR	G3A	3		0.191	123	1458.63	1458.7	0.0701	A0A8C0PXB0	CANLF	Spectrin beta chain	Spectrin beta chain OS=Canis lupus familiaris OX=9615 GN=SPTBN1 PE=3 SV=1				741	DVEDEILWVGER	G2B	2
0.212	129	1053.45	1053.53	0.0818	A0A8C0MWQ8	CANLF	Hematopoietic cell-specific Lyn substrate 1	Hematopoietic cell-specific Lyn substrate 1 OS=Canis lupus familiaris OX=9615 PE=4 SV=1	710	GFGGQYGIQK	G2B	2		0.705	84	1165.64	1165.64	0.0028	A0A8C0SV20	CANLF	Lumican	Lumican OS=Canis lupus familiaris OX=9615 GN=LUM PE=4 SV=1	1014	RFNGLQYLR	G3B	3		0.192	264	1288.64	1288.64	0.0018	A0A8C0RH53	CANLF	Stress induced phosphoprotein 1	Stress induced phosphoprotein 1 OS=Canis lupus familiaris OX=9615 PE=4 SV=1				369	MEQVNELKEK	G3B	3
0.213	191	1220.64	1220.63	0.0047	A0A8C0SBE5	CANLF	40S ribosomal protein S4	40S ribosomal protein S4 OS=Canis lupus familiaris OX=9615 GN=RPS4X PE=3 SV=1	475	HPGSFDVVHVK	G2A	2		0.758	128	1139.64	1139.65	0.0023	A0A8C0PP72	CANLF	Ribosomal protein L18	Ribosomal protein L18 OS=Canis lupus familiaris OX=9615 GN=RPL18 PE=3 SV=1	724	TNRPPLSLSR	G1A	1		0.194	405	1080.45	1080.51	0.0611	A0A8C0PF16	CANLF	Transferrin-like domain-containing protein	Transferrin-like domain-containing protein OS=Canis lupus familiaris OX=9615 GN=LTF PE=3 SV=1				233	YFGYTGAFR	G3B	3
0.214	924	809.457	809.516	0.0587	A0A8I3PXF9	CANLF	SAM domain-containing protein	SAM domain-containing protein OS=Canis lupus familiaris OX=9615 GN=SAMD1 PE=4 SV=1	78	LGALALPR	G1B	1		0.702	19	999.449	999.539	0.0895	A0A8C0PLP5	CANLF	Plectin	Plectin OS=Canis lupus familiaris OX=9615 GN=PLEC PE=4 SV=1	4148	QAEAELALR	G2B	2		0.197	356	1407.63	1407.67	0.0408	A0A8C0RDD6	CANLF	Transgelin	Transgelin OS=Canis lupus familiaris OX=9615 GN=TAGLN PE=3 SV=1				264	GASQAGMTGYGRPR	G2B	2
0.214	854	1242.64	1242.65	0.0108	A0A8C0SSF9	CANLF	Ly1 antibody reactive	Ly1 antibody reactive OS=Canis lupus familiaris OX=9615 GN=LYAR PE=4 SV=1	88	VLAVGTNDPTEK	G2A	2		0.703	66	1193.64	1193.63	0.0112	A0A8C0M6L4	CANLF	Cytosol aminopeptidase	Cytosol aminopeptidase OS=Canis lupus familiaris OX=9615 GN=LAP3 PE=3 SV=1	1309	GITFDSGGISIK	G2B	2		0.199	6	780.458	780.42	0.0381	A0A8P0TN04	CANLF	PDZ domain-containing protein	PDZ domain-containing protein OS=Canis lupus familiaris OX=9615 GN=AHNAK PE=4 SV=1				8719	FSVPGFK	G1A	1
0.218	548	900.453	900.489	0.0362	A0A8C0NRD9	CANLF	Bifunctional purine biosynthesis protein ATIC	Bifunctional purine biosynthesis protein ATIC OS=Canis lupus familiaris OX=9615 GN=ATIC PE=3 SV=1	164	GISQMPLR	G1A	1		0.701	141	1227.64	1227.64	0.003	A0A8C0NGA6	CANLF	Non-POU domain containing octamer binding	Non-POU domain containing octamer binding OS=Canis lupus familiaris OX=9615 GN=NONO PE=4 SV=1	557	AAPGAEFAPNKR	G1A	1		0.199	114	2056.01	2056.08	0.0709	A0A8C0NXB1	CANLF	KH-type splicing regulatory protein	KH-type splicing regulatory protein OS=Canis lupus familiaris OX=9615 PE=4 SV=1				817	LASQGDSISSQLGPIHPPPR	G2A	2
0.221	332	901.453	901.453	0.0003	A0A8I3NZ00	CANLF	G protein subunit beta 1	G protein subunit beta 1 OS=Canis lupus familiaris OX=9615 GN=GNB1 PE=3 SV=1	281	SELDQLR	G2A	2		0.734	1635	1138.64	1138.62	0.0266	A0A8C0M3C8	CANLF	Aminopeptidase	Aminopeptidase OS=Canis lupus familiaris OX=9615 PE=3 SV=1	30	LNLGTVGFYR	G2A	2		0.202	316	2215	2215.14	0.139	A0A8C0N9Q2	CANLF	Ras-related protein Rab-7a	Ras-related protein Rab-7a OS=Canis lupus familiaris OX=9615 GN=RAB7A PE=4 SV=1				306	DPENFPFVVLGNKIDLENR	G2A	2
0.225	85	722.46	722.446	0.0144	A0A1B1X469	CANLF	ATP synthase subunit alpha	ATP synthase subunit alpha OS=Canis lupus familiaris OX=9615 GN=ATP5F1A PE=2 SV=1	1005	APGIIPR	G1B	1		0.718	956	1214.64	1214.63	0.009	A0A8C0RH82	CANLF	Tyrosine-protein kinase	Tyrosine-protein kinase OS=Canis lupus familiaris OX=9615 GN=CSK PE=3 SV=1	75	LSLMPWFHGK	G2B	2		0.203	106	1094.45	1094.52	0.0766	A0A8C0PSX5	CANLF	Calcium-transporting ATPase	Calcium-transporting ATPase OS=Canis lupus familiaris OX=9615 GN=ATP2A1 PE=3 SV=1				845	MNVFNTDVR	G1A	1
0.226	63	1241.64	1241.65	0.0111	A0A6S4Q8B0	CANLF	DLA class I alpha chain	DLA class I alpha chain OS=Canis lupus familiaris OX=9615 GN=DLA88 PE=3 SV=1	1228	TFKETAQVYR	G2A	2		0.74	19	1077.45	1077.51	0.0668	A0A8C0PLP5	CANLF	Plectin	Plectin OS=Canis lupus familiaris OX=9615 GN=PLEC PE=4 SV=1	4148	LAEDEAFQR	G2B	2		0.213	238	877.454	877.469	0.0144	A0A8C0QQP0	CANLF	C-1-tetrahydrofolate synthase, cytoplasmic	C-1-tetrahydrofolate synthase, cytoplasmic OS=Canis lupus familiaris OX=9615 GN=MTHFD1 PE=3 SV=1				399	FSDIQIR	G2A	2
0.227	501	1348.63	1348.63	0.0081	A0A8C0S6Z3	CANLF	GRIP1 associated protein 1	GRIP1 associated protein 1 OS=Canis lupus familiaris OX=9615 GN=GRIPAP1 PE=4 SV=1	182	AQALSEEEFQR	G2B	2		0.755	716	1100.65	1100.64	0.0032	A0A8C0PIK7	CANLF	GTPase, IMAP family member 4	GTPase, IMAP family member 4 OS=Canis lupus familiaris OX=9615 GN=GIMAP4 PE=3 SV=1	116	MQLLTLVQR	G3A	3		0.215	414	2216	2216.2	0.2016	A0A8C0NEF6	CANLF	Coiled-coil domain-containing protein 22	Coiled-coil domain-containing protein 22 OS=Canis lupus familiaris OX=9615 GN=CCDC22 PE=3 SV=1				228	EFQASPLLLPAPTQVPQPAGR	G3A	3
0.229	1369	1243.64	1243.63	0.0125	A0A8C0MDE2	CANLF	Coiled-coil domain-containing protein 43	Coiled-coil domain-containing protein 43 OS=Canis lupus familiaris OX=9615 PE=3 SV=1	42	NTNVEDVLNAR	G2B	2		0.749	1484	1127.64	1127.64	0.0069	A0A8C0M4B9	CANLF	Acetyl-CoA carboxylase kinase	Acetyl-CoA carboxylase kinase OS=Canis lupus familiaris OX=9615 PE=3 SV=1	36	VPFLVAETPR	G2A	2		0.222	572	2132	2132.07	0.068	A0A8C0QGH7	CANLF	Fatty acid synthase	Fatty acid synthase OS=Canis lupus familiaris OX=9615 PE=4 SV=1				157	AAEQYTPQATYHGNVTLLR	G1A	1
0.233	108	821.456	821.504	0.0477	A0A8I3NL88	CANLF	Protein disulfide-isomerase A4	Protein disulfide-isomerase A4 OS=Canis lupus familiaris OX=9615 GN=PDIA4 PE=3 SV=1	842	SPPIPLAK	G2B	2		0.713	130	1102.44	1102.51	0.0707	A0A8C0MFH9	CANLF	Transforming growth factor beta induced	Transforming growth factor beta induced OS=Canis lupus familiaris OX=9615 PE=4 SV=1	690	YGTLFTMDR	G3A	3		0.225	1152	2057	2057	0.0075	A0A8C0NBD2	CANLF	SAM and SH3 domain containing 3	SAM and SH3 domain containing 3 OS=Canis lupus familiaris OX=9615 GN=SASH3 PE=4 SV=1				56	MALAFSEQEEHELPALSR	G2B	2
0.239	471	1128.44	1128.51	0.0691	A0A8C0RFT9	CANLF	Carbonic anhydrase	Carbonic anhydrase OS=Canis lupus familiaris OX=9615 GN=CA3 PE=3 SV=1	196	VVFDDTYDR	G1A	1		0.768	7	998.449	998.559	0.1094	A0A8C0MNE2	CANLF	Myosin-9	Myosin-9 OS=Canis lupus familiaris OX=9615 GN=MYH9 PE=3 SV=1	8891	GDLPFVVPR	G3A	3		0.226	1418	1095.65	1095.65	0.0037	A0A8C0NXB5	CANLF	Microtubule actin crosslinking factor	Microtubule actin crosslinking factor 1 OS=Canis lupus familiaris OX=9615 GN=MACF1 PE=4 SV=1				40	ALLELVPWR	G2A	2
0.24	595	950.451	950.474	0.023	A0A8C0SKU0	CANLF	ADP/ATP translocase	ADP/ATP translocase OS=Canis lupus familiaris OX=9615 GN=SLC25A5 PE=3 SV=1	148	TDAAVSFAK	G2B	2		0.711	29	1188.64	1188.63	0.0128	A0A5F4CSK0	CANLF	Tropomyosin 3	Tropomyosin 3 OS=Canis lupus familiaris OX=9615 GN=TPM3 PE=3 SV=1	3072	TIDDLEDKLK	G3B	3		0.227	222	2217	2217.02	0.0236	A0A8C0MPT3	CANLF	F-actin-capping protein subunit beta	F-actin-capping protein subunit beta OS=Canis lupus familiaris OX=9615 GN=CAPZB PE=3 SV=1				414	SPWSNKYDPPLEDGAMPSAR	G2A	2
0.241	282	902.453	902.491	0.0376	A0A8C0MLR6	CANLF	Caldesmon 1	Caldesmon 1 OS=Canis lupus familiaris OX=9615 PE=4 SV=1	345	INEWLTK	G1A	1		0.713	1494	1355.63	1355.66	0.0223	A0A8C0NGE2	CANLF	DEK proto-oncogene	DEK proto-oncogene OS=Canis lupus familiaris OX=9615 PE=4 SV=1	36	NVGQFSGFPFEK	G2B	2		0.231	19	2114	2114.01	0.0127	A0A8C0PLP5	CANLF	Plectin	Plectin OS=Canis lupus familiaris OX=9615 GN=PLEC PE=4 SV=1				4148	AGTLSITEFADMLSGNAGGFR	G3A	3
0.241	178	1207.64	1207.66	0.0183	A0A8C0MIM6	CANLF	Apolipoprotein A-IV	Apolipoprotein A-IV OS=Canis lupus familiaris OX=9615 GN=APOA4 PE=3 SV=1	515	LLPHASEVSQK	G3B	3		0.715	747	1213.64	1213.63	0.0098	A0A8C0PJI4	CANLF	Acetyl-coenzyme A synthetase	Acetyl-coenzyme A synthetase OS=Canis lupus familiaris OX=9615 PE=3 SV=1	108	EPAAFWGPLAR	G2B	2		0.234	406	2113	2112.99	0.0126	A0A8P0N4U0	CANLF	Heme oxygenase	Heme oxygenase OS=Canis lupus familiaris OX=9615 GN=HMOX1 PE=3 SV=1				233	MERPQPDSMPQDLSEALK	G2A	2
0.243	1261	1219.64	1219.64	0.0043	A0A8C0NRL7	CANLF	LIM domain containing preferred translocation partner in lipoma	LIM domain containing preferred translocation partner in lipoma OS=Canis lupus familiaris OX=9615 GN=LPP PE=4 SV=1	47	STGEPLGHVPAR	G3B	3		0.703	1483	1126.64	1126.64	0.0041	A0A8C0MIJ2	CANLF	EF-hand domain-containing protein	EF-hand domain-containing protein OS=Canis lupus familiaris OX=9615 PE=4 SV=1	36	LSPQAVNSIAK	G2A	2		0.234	24	1584.82	1584.83	0.0071	A0A8I3NQW0	CANLF	Capping actin protein, gelsolin like	Capping actin protein, gelsolin like OS=Canis lupus familiaris OX=9615 GN=CAPG PE=4 SV=1				3570	YAPNTQVEILPQGR	G2A	2
0.245	297	858.455	858.487	0.032	A0A8C0NIR4	CANLF	Myosin IF	Myosin IF OS=Canis lupus familiaris OX=9615 PE=3 SV=1	325	GSGDLAVLK	G2B	2		0.718	283	883.454	883.48	0.0255	A0A8C0MXC8	CANLF	Myosin binding protein C, slow type	Myosin binding protein C, slow type OS=Canis lupus familiaris OX=9615 GN=MYBPC1 PE=4 SV=1	344	VAIVDDPR	G1B	1		0.236	153	1465.63	1465.68	0.0533	A0A8C0NUP7	CANLF	Prothymosin alpha	Prothymosin alpha OS=Canis lupus familiaris OX=9615 GN=PTMA PE=3 SV=1				594	SDAAVDTSSEITTK	G2B	2
0.247	16	951.451	951.469	0.0174	A0A8C0NGQ5	CANLF	Filamin A	Filamin A OS=Canis lupus familiaris OX=9615 PE=3 SV=1	5160	AEFTVETR	G2B	2		0.706	1140	1278.64	1278.63	0.0089	A0A8C0NZG4	CANLF	Adducin 3	Adducin 3 OS=Canis lupus familiaris OX=9615 GN=ADD3 PE=3 SV=1	57	VGEIEFEGLMR	G2A	2		0.236	1067	1748.82	1748.84	0.0194	A0A8C0LSC8	CANLF	GON7 subunit of KEOPS complex	GON7 subunit of KEOPS complex OS=Canis lupus familiaris OX=9615 GN=GON7 PE=4 SV=1				65	MELLGEYVGLDGQQR	G2A	2
0.249	84	966.45	966.468	0.0176	A0A8C0SV20	CANLF	Lumican	Lumican OS=Canis lupus familiaris OX=9615 GN=LUM PE=4 SV=1	1014	EDTVSAAFK	G2A	2		0.731	2	997.449	997.482	0.033	ACTB	CANLF	Actin, cytoplasmic 1	Actin, cytoplasmic 1 OS=Canis lupus familiaris OX=9615 GN=ACTB PE=2 SV=3	15866	DLTDYLMK	G3A	3		0.238	281	1464.63	1464.72	0.0863	A0A8C0YZP0	CANLF	Myotrophin	Myotrophin OS=Canis lupus familiaris OX=9615 PE=4 SV=1				345	NGDLDEVKDYVAK	G2A	2
0.249	54	1054.45	1054.54	0.0897	A0A8C0MES4	CANLF	Peptidyl-prolyl cis-trans isomerase	Peptidyl-prolyl cis-trans isomerase OS=Canis lupus familiaris OX=9615 PE=3 SV=1	1607	VSFELFADK	G3A	3		0.71	10	1354.63	1354.66	0.0223	A0A8C0MNX2	CANLF	Tubulin beta chain	Tubulin beta chain OS=Canis lupus familiaris OX=9615 GN=LOC478701 PE=3 SV=1	5037	INVYYNEAAGNK	G2A	2		0.24	6	2041.01	2041	0.0081	A0A8P0TN04	CANLF	PDZ domain-containing protein	PDZ domain-containing protein OS=Canis lupus familiaris OX=9615 GN=AHNAK PE=4 SV=1				8719	VDVDVPDVDVHGPDWHLK	G2A	2
0.25	4	850.455	850.422	0.0333	A0A8C0LRY0	CANLF	Collagen type I alpha 1 chain	Collagen type I alpha 1 chain OS=Canis lupus familiaris OX=9615 PE=4 SV=1	13672	GFSGLDGAK	G3A	3																0.246	51	2040.01	2039.98	0.0227	A0A8C0NPN5	CANLF	14-3-3 domain-containing protein	14-3-3 domain-containing protein OS=Canis lupus familiaris OX=9615 PE=3 SV=1				1678	GIVDQSQQAYQEAFEISK	G3B	3
0.251	131	1217.64	1217.64	0.0045	A0A8C0NAG1	CANLF	ELAV-like protein	ELAV-like protein OS=Canis lupus familiaris OX=9615 PE=3 SV=1	678	DANLYISGLPR	G2B	2																0.246	43	1121.64	1121.64	0.0015	A0A8C0MM64	CANLF	Endoplasmin	Endoplasmin OS=Canis lupus familiaris OX=9615 GN=HSP90B1 PE=3 SV=1				1552	HPLIKDMLR	G2A	2
0.253	111	1215.64	1215.63	0.0108	A0A8C0PLW8	CANLF	60S ribosomal protein L7a	60S ribosomal protein L7a OS=Canis lupus familiaris OX=9615 GN=RPL7A PE=3 SV=1	835	NFGIGQDIQPK	G3A	3																0.247	1446	2133	2133.11	0.105	A0A8C0NB32	CANLF	ATP-dependent RNA helicase	ATP-dependent RNA helicase OS=Canis lupus familiaris OX=9615 GN=DDX1 PE=3 SV=1				39	EAQTSFLHLGYLPNQLFR	G2A	2
0.254	141	832.456	832.441	0.0157	A0A8C0NGA6	CANLF	Non-POU domain containing octamer binding	Non-POU domain containing octamer binding OS=Canis lupus familiaris OX=9615 GN=NONO PE=4 SV=1	557	ALIEMEK	G2A	2																0.247	305	2105	2104.98	0.0251	A0A8C0P1E8	CANLF	Poly(rC) binding protein 1	Poly(rC) binding protein 1 OS=Canis lupus familiaris OX=9615 GN=PCBP1 PE=4 SV=1				319	ESTGAQVQVAGDMLPNSTER	G2A	2
0.256	247	948.451	948.474	0.0224	A0A8C0N999	CANLF	60S ribosomal protein L4	60S ribosomal protein L4 OS=Canis lupus familiaris OX=9615 GN=RPL4 PE=3 SV=1	388	MLNTDLSR	G1A	1																0.248	1227	954.651	954.481	0.1705	A0A8C0MDE3	CANLF	Nucleosome assembly protein 1 like 1	Nucleosome assembly protein 1 like 1 OS=Canis lupus familiaris OX=9615 GN=NAP1L1 PE=3 SV=1				50	ADIDNLPR	G2B	2
0.257	896	1233.64	1233.64	0.0011	A0A8C0M7N9	CANLF	Rad60/SUMO-like domain-containing protein	Rad60/SUMO-like domain-containing protein OS=Canis lupus familiaris OX=9615 GN=SUMO2 PE=4 SV=1	82	VAGQDGSVVQFK	G2A	2																0.249	142	1289.64	1289.67	0.031	A0A8C0MCJ9	CANLF	Stress-70 protein, mitochondrial	Stress-70 protein, mitochondrial OS=Canis lupus familiaris OX=9615 PE=3 SV=1				621	VQQTVQDLFGR	G2B	2
0.259	831	1192.64	1192.64	0.0001	A0A8C0P1Y0	CANLF	Dihydrolipoyl dehydrogenase	Dihydrolipoyl dehydrogenase OS=Canis lupus familiaris OX=9615 GN=DLD PE=3 SV=1	91	VGKFPFAANSR	G3A	3																0.251	136	2088	2088.01	0.0068	A0A8C0SIZ0	CANLF	F-actin-capping protein subunit alpha	F-actin-capping protein subunit alpha OS=Canis lupus familiaris OX=9615 GN=CAPZA1 PE=3 SV=1				650	FITHAPPGEFNEVFNDVR	G3A	3
0.26	8	879.454	879.438	0.0167	A0A8C0NV01	CANLF	Albumin	Albumin OS=Canis lupus familiaris OX=9615 GN=ALB PE=4 SV=1	7315	ADFAEISK	G3B	3																0.254	312	835.456	835.457	0.0004	A0A8C0S7T9	CANLF	protein-tyrosine-phosphatase	protein-tyrosine-phosphatase OS=Canis lupus familiaris OX=9615 PE=4 SV=1				307	FSIKDAR	G2B	2
0.26	434	1049.45	1049.48	0.0336	A0A8C0QAV1	CANLF	Aconitase 1	Aconitase 1 OS=Canis lupus familiaris OX=9615 PE=3 SV=1	219	NQDLEFER	G2A	2																0.254	931	1655.82	1655.86	0.0351	A0A8C0PAM2	CANLF	Pre-mRNA processing factor 4	Pre-mRNA processing factor 4 OS=Canis lupus familiaris OX=9615 PE=4 SV=1				77	ALGEPITLFGEGPAER	G2B	2
0.26	1224	1155.44	1155.56	0.121	A0A8C0MTB6	CANLF	Ubiquitin carboxyl-terminal hydrolase	Ubiquitin carboxyl-terminal hydrolase OS=Canis lupus familiaris OX=9615 GN=UCHL3 PE=3 SV=1	50	YLENYDAIR	G2B	2																0.255	1091	2003.01	2003	0.0031	A0A8C0N5D2	CANLF	Proteasome subunit beta	Proteasome subunit beta OS=Canis lupus familiaris OX=9615 GN=PSMB1 PE=3 SV=1				62	AGGSASAMLQPLLDNQVGFK	G3B	3
0.26	92	1167.64	1167.63	0.0136	A0A8C0PAU8	CANLF	Lamin B1	Lamin B1 OS=Canis lupus familiaris OX=9615 PE=3 SV=1	938	ASAPATPLSPTR	G2A	2																0.255	305	2089	2088.98	0.0223	A0A8C0P1E8	CANLF	Poly(rC) binding protein 1	Poly(rC) binding protein 1 OS=Canis lupus familiaris OX=9615 GN=PCBP1 PE=4 SV=1				319	ESTGAQVQVAGDMLPNSTER	G2A	2
0.26	30	1216.64	1216.63	0.0115	A0A8C0MIT4	CANLF	78 kDa glucose-regulated protein	78 kDa glucose-regulated protein OS=Canis lupus familiaris OX=9615 PE=3 SV=1	3033	DAGTIAGLNVMR	G3A	3																0.258	43	1832.81	1832.78	0.0324	A0A8C0M536	CANLF	Heat shock protein 90 alpha family class A member 1	Heat shock protein 90 alpha family class A member 1 OS=Canis lupus familiaris OX=9615 PE=3 SV=1				1726	NPDDITNEEYGEFYK	G2A	2
0.262	1417	1047.65	1047.58	0.0639	A0A1U9XK90	CANLF	Mitsugumin 53	Mitsugumin 53 OS=Canis lupus familiaris OX=9615 PE=2 SV=1	40	LLPAAEAHAR	G1B	1																0.258	1017	1654.82	1654.79	0.0312	A0A8C0NHA1	CANLF	FMR1 autosomal homolog 2	FMR1 autosomal homolog 2 OS=Canis lupus familiaris OX=9615 PE=3 SV=1				69	SYLEFSEDSVQVPR	G3A	3
0.264	184	1181.64	1181.64	0.0036	A0A8C0QGR9	CANLF	Vasodilator-stimulated phosphoprotein	Vasodilator-stimulated phosphoprotein OS=Canis lupus familiaris OX=9615 GN=VASP PE=3 SV=1	496	VPVPAQSETVR	G2B	2																0.259	17	2104	2104	0.0035	A0A8C0NS77	CANLF	Collagen type VI alpha 3 chain	Collagen type VI alpha 3 chain OS=Canis lupus familiaris OX=9615 GN=COL6A3 PE=4 SV=1				5036	MKPMEGSVLYTGSALDFAR	G1A	1
0.266	109	928.652	928.563	0.0887	A0A8C0N6L0	CANLF	Ribosomal protein L3	Ribosomal protein L3 OS=Canis lupus familiaris OX=9615 PE=3 SV=1	839	ALEKIDLK	G2B	2																0.261	1249	1815.82	1815.84	0.0207	A0A8C0R9T3	CANLF	Charged multivesicular body protein 2A	Charged multivesicular body protein 2A OS=Canis lupus familiaris OX=9615 GN=CHMP2A PE=3 SV=1				48	AEAAASALVDADADLEER	G3B	3
0.267	609	1066.45	1066.54	0.0888	A0A8C0NXA3	CANLF	Ubiquinol-cytochrome c reductase core protein 1	Ubiquinol-cytochrome c reductase core protein 1 OS=Canis lupus familiaris OX=9615 GN=UQCRC1 PE=4 SV=1	142	ADLTEYLSR	G3A	3																0.264	1642	1079.45	1079.53	0.0832	A0A8C0LS45	CANLF	Proline rich coiled-coil 2C	Proline rich coiled-coil 2C OS=Canis lupus familiaris OX=9615 GN=PRRC2C PE=4 SV=1				30	STTPTSSPFR	G2A	2
0.268	1266	814.456	814.494	0.0378	A0A1S7J0A8	CANLF	Monocyte differentiation antigen CD14	Monocyte differentiation antigen CD14 OS=Canis lupus familiaris OX=9615 GN=607076 PE=2 SV=1	47	LSVLDLR	G2A	2																0.264	107	851.455	851.526	0.0711	A0A8C0ME72	CANLF	Clathrin heavy chain	Clathrin heavy chain OS=Canis lupus familiaris OX=9615 GN=CLTC PE=3 SV=1				843	AQILPIR	G2A	2
0.268	26	1221.64	1221.63	0.0123	A0A8P0PI75	CANLF	Keratin 75	Keratin 75 OS=Canis lupus familiaris OX=9615 GN=KRT75 PE=3 SV=1	2094	TAAENEFVTLK	G3B	3																0.264	1097	1104.64	1104.59	0.0563	A0A8C0PHB9	CANLF	LIM domain and actin binding 1	LIM domain and actin binding 1 OS=Canis lupus familiaris OX=9615 GN=LIMA1 PE=4 SV=1				61	VGVLTASMEAK	G2B	2
0.269	1317	1090.45	1090.56	0.119	A0A8C0NE69	CANLF	Early endosome antigen 1	Early endosome antigen 1 OS=Canis lupus familiaris OX=9615 PE=4 SV=1	45	LSASETSLQR	G2A	2																0.265	1499	1453.63	1453.71	0.0828	A0A8C0NEA2	CANLF	Esterase OVCA2	Esterase OVCA2 OS=Canis lupus familiaris OX=9615 PE=3 SV=1				36	QAYLNFLDQLTE	G2B	2
0.27	1696	859.455	859.46	0.0044	A0A8C0SQ47	CANLF	SS18 subunit of BAF chromatin remodeling complex	SS18 subunit of BAF chromatin remodeling complex OS=Canis lupus familiaris OX=9615 GN=SS18 PE=3 SV=1	28	SVAFAAPR	G3B	3																0.266	206	1110.64	1110.64	0.0001	A0A8C0N5B0	CANLF	60S ribosomal protein L27a	60S ribosomal protein L27a OS=Canis lupus familiaris OX=9615 PE=3 SV=1				453	TGAAPIIDVVR	G3A	3
0.27	769	993.649	993.54	0.1093	A0A8C0QGD9	CANLF	propionate--CoA ligase	propionate--CoA ligase OS=Canis lupus familiaris OX=9615 PE=3 SV=1	102	SAHVPSLQR	G2B	2																0.266	934	1266.64	1266.64	0.0021	A0A8C0P0P5	CANLF	Collagen beta(1-O)galactosyltransferase 1	Collagen beta(1-O)galactosyltransferase 1 OS=Canis lupus familiaris OX=9615 GN=COLGALT1 PE=3 SV=1				77	WSPESPLQAPR	G2A	2
0.271	934	929.652	929.538	0.1146	A0A8C0P0P5	CANLF	Collagen beta(1-O)galactosyltransferase 1	Collagen beta(1-O)galactosyltransferase 1 OS=Canis lupus familiaris OX=9615 GN=COLGALT1 PE=3 SV=1	77	TPAYIPIR	G2B	2																0.267	1019	1459.63	1459.67	0.0446	A0A8C0RLH3	CANLF	ILK associated serine/threonine phosphatase	ILK associated serine/threonine phosphatase OS=Canis lupus familiaris OX=9615 GN=ILKAP PE=3 SV=1				69	MDLFGDLPEPER	G2B	2
0.271	29	1475.63	1475.68	0.0496	A0A5F4CSK0	CANLF	Tropomyosin 3	Tropomyosin 3 OS=Canis lupus familiaris OX=9615 GN=TPM3 PE=3 SV=1	3072	LEEAEKAADESER	G1A	1																0.269	63	784.458	784.484	0.026	A0A5J6CVR2	CANLF	MHC class I antigen (Fragment)	MHC class I antigen (Fragment) OS=Canis lupus familiaris OX=9615 GN=DLA88 PE=2 SV=1				762	VGLDILR	G3A	3
0.273	80	1208.44	1208.57	0.1288	A0A8C0NCH8	CANLF	Matrin 3	Matrin 3 OS=Canis lupus familiaris OX=9615 GN=MATR3 PE=4 SV=1	1060	TEEGPTLSYGR	G2A	2																0.269	4	2002.01	2002.01	0.0001	A0A8C0LRY0	CANLF	Collagen type I alpha 1 chain	Collagen type I alpha 1 chain OS=Canis lupus familiaris OX=9615 PE=4 SV=1				13672	NGDRGETGPAGPAGPIGPVGAR	G2A	2
0.275	94	760.259	760.42	0.1607	A0A8C0NCX3	CANLF	Dihydropyrimidine dehydrogenase [NADP(+)]	Dihydropyrimidine dehydrogenase [NADP(+)] OS=Canis lupus familiaris OX=9615 PE=3 SV=1	937	IAELMGK	G3A	3																0.269	661	1105.64	1105.63	0.0151	A0A8I3RZ20	CANLF	Pyrroline-5-carboxylate reductase	Pyrroline-5-carboxylate reductase OS=Canis lupus familiaris OX=9615 GN=PYCR3 PE=3 SV=1				129	AAAAALGPGPLR	G2A	2
0.277	580	1048.65	1048.61	0.0399	A0A8C0Z3I7	CANLF	Ribosomal protein L37a	Ribosomal protein L37a OS=Canis lupus familiaris OX=9615 GN=RPL37A PE=3 SV=1	154	VGIVGKYGTR	G1B	1																0.272	5	2042.01	2042.01	0.0093	MYH2	CANLF	Myosin-2	Myosin-2 OS=Canis lupus familiaris OX=9615 GN=MYH2 PE=3 SV=1				11617	TLAYLFSGAQTAEAEASGGAK	G1B	1
0.279	32	1117.44	1117.55	0.1091	A0A8C0MLN7	CANLF	Histone H2A	Histone H2A OS=Canis lupus familiaris OX=9615 GN=H2AFV PE=3 SV=1	593	GDEELDSLIK	G3B	3																0.272	694	1816.82	1816.74	0.0783	A0A8C0TCU2	CANLF	Emerin	Emerin OS=Canis lupus familiaris OX=9615 GN=EMD PE=4 SV=1				119	GYGDDYYEESYLSTR	G3A	3
0.28	155	874.454	874.48	0.026	A0A8C0M9E2	CANLF	AE binding protein 1	AE binding protein 1 OS=Canis lupus familiaris OX=9615 PE=4 SV=1	592	TNAISEIK	G1A	1																0.283	739	1554.83	1554.76	0.069	A0A8C0NKG9	CANLF	Protein kinase cAMP-dependent type II regulatory subunit alpha	Protein kinase cAMP-dependent type II regulatory subunit alpha OS=Canis lupus familiaris OX=9615 PE=3 SV=1				110	GSFGELALMYNTPR	G2A	2
0.281	256	810.457	810.499	0.0422	A0A8C0RKQ6	CANLF	Ribosomal protein	Ribosomal protein OS=Canis lupus familiaris OX=9615 PE=3 SV=1	378	ILGPGLNK	G3A	3																0.284	293	1452.63	1452.69	0.059	A0A8C0MHU9	CANLF	Clathrin light chain	Clathrin light chain OS=Canis lupus familiaris OX=9615 GN=CLTA PE=3 SV=1				329	EAQQYSEALASTR	G2A	2
0.282	1365	834.456	834.548	0.0913	A0A8C0N0J5	CANLF	Myoferlin	Myoferlin OS=Canis lupus familiaris OX=9615 GN=MYOF PE=3 SV=1	43	LALHILR	G2A	2																0.294	106	1560.83	1560.83	0.0037	A0A8C0PSX5	CANLF	Calcium-transporting ATPase	Calcium-transporting ATPase OS=Canis lupus familiaris OX=9615 GN=ATP2A1 PE=3 SV=1				845	VGEATETALTTLVEK	G1B	1
0.282	81	949.451	949.491	0.0398	A0A8C0N2F6	CANLF	60S ribosomal protein L13	60S ribosomal protein L13 OS=Canis lupus familiaris OX=9615 GN=RPL13 PE=3 SV=1	1046	GFSLEELR	G1A	1																0.295	448	1466.63	1466.66	0.0303	A0A8C0MNK1	CANLF	Splicing factor 3b subunit 1	Splicing factor 3b subunit 1 OS=Canis lupus familiaris OX=9615 GN=SF3B1 PE=3 SV=1				207	DTPGHGSGWAETPR	G3A	3
0.282	169	978.45	978.469	0.0191	A0A8C0Z6D9	CANLF	Troponin T3, fast skeletal type	Troponin T3, fast skeletal type OS=Canis lupus familiaris OX=9615 GN=TNNT3 PE=3 SV=1	544	VDFDDIQK	G1A	1																0.3	5	868.454	868.473	0.0187	MYH2	CANLF	Myosin-2	Myosin-2 OS=Canis lupus familiaris OX=9615 GN=MYH2 PE=3 SV=1				11617	ILYADFK	G1B	1
0.282	171	1231.64	1231.64	0.0056	A0A8C0Q0M7	CANLF	EF-hand domain family member D2	EF-hand domain family member D2 OS=Canis lupus familiaris OX=9615 PE=4 SV=1	540	ATDELASKLSR	G1A	1
0.283	60	1050.45	1050.52	0.0727	A0A8C0NHS9	CANLF	Transitional endoplasmic reticulum ATPase	Transitional endoplasmic reticulum ATPase OS=Canis lupus familiaris OX=9615 GN=VCP PE=3 SV=1	1504	MDELQLFR	G3A	3																0.894	111	1215.64	1215.63	0.0108	A0A8C0PLW8	CANLF	60S ribosomal protein L7a	60S ribosomal protein L7a OS=Canis lupus familiaris OX=9615 GN=RPL7A PE=3 SV=1				835	NFGIGQDIQPK	G3A	3
0.285	163	942.651	942.568	0.0829	A0A8C0SIY9	CANLF	RRM domain-containing protein	RRM domain-containing protein OS=Canis lupus familiaris OX=9615 PE=3 SV=1	562	VPPPPPIAR	G2B	2																0.892	30	1216.64	1216.63	0.0115	A0A8C0MIT4	CANLF	78 kDa glucose-regulated protein	78 kDa glucose-regulated protein OS=Canis lupus familiaris OX=9615 PE=3 SV=1				3033	DAGTIAGLNVMR	G3A	3
0.285	91	1474.63	1474.74	0.1103	A0A8C0SPN7	CANLF	Polypyrimidine tract binding protein 3	Polypyrimidine tract binding protein 3 OS=Canis lupus familiaris OX=9615 PE=4 SV=1	110	SQPVFIQYSNHR	G2A	2																0.89	471	1128.44	1128.51	0.0691	A0A8C0RFT9	CANLF	Carbonic anhydrase	Carbonic anhydrase OS=Canis lupus familiaris OX=9615 GN=CA3 PE=3 SV=1				196	VVFDDTYDR	G1A	1
0.286	170	816.456	816.418	0.038	A0A8I3PE72	CANLF	Titin	Titin OS=Canis lupus familiaris OX=9615 GN=TTN PE=3 SV=1	542	MPVSDLR	G1B	1																0.89	831	1192.64	1192.64	0.0001	A0A8C0P1Y0	CANLF	Dihydrolipoyl dehydrogenase	Dihydrolipoyl dehydrogenase OS=Canis lupus familiaris OX=9615 GN=DLD PE=3 SV=1				91	VGKFPFAANSR	G3A	3
0.286	580	1142.44	1142.59	0.1422	A0A8C0Z3I7	CANLF	Ribosomal protein L37a	Ribosomal protein L37a OS=Canis lupus familiaris OX=9615 GN=RPL37A PE=3 SV=1	154	YGTRYGASLR	G2B	2																0.877	63	1241.64	1241.65	0.0111	A0A6S4Q8B0	CANLF	DLA class I alpha chain	DLA class I alpha chain OS=Canis lupus familiaris OX=9615 GN=DLA88 PE=3 SV=1				1228	TFKETAQVYR	G2A	2
0.289	301	1204.64	1204.63	0.0123	A0A8C0NR61	CANLF	RNA-binding protein 14	RNA-binding protein 14 OS=Canis lupus familiaris OX=9615 GN=LOC610648 PE=4 SV=1	324	AQPSASLGVGYR	G1B	1																0.877	26	1150.64	1150.59	0.0513	A0A8C0NY99	CANLF	Keratin, type II cytoskeletal 1	Keratin, type II cytoskeletal 1 OS=Canis lupus familiaris OX=9615 GN=KRT1 PE=3 SV=1				2037	YEELQITAGK	G2A	2
0.291	35	744.259	744.46	0.2012	A0A8C0Z1Y0	CANLF	Annexin	Annexin OS=Canis lupus familiaris OX=9615 PE=3 SV=1	2644	LMVALAK	G2B	2																0.874	854	1242.64	1242.65	0.0108	A0A8C0SSF9	CANLF	Ly1 antibody reactive	Ly1 antibody reactive OS=Canis lupus familiaris OX=9615 GN=LYAR PE=4 SV=1				88	VLAVGTNDPTEK	G2A	2
0.291	134	1103.44	1103.53	0.0879	A0A8C0MHZ2	CANLF	Elastin microfibril interfacer 1	Elastin microfibril interfacer 1 OS=Canis lupus familiaris OX=9615 GN=EMILIN1 PE=4 SV=1	659	SEPGTVPFDR	G2A	2																0.863	1369	1243.64	1243.63	0.0125	A0A8C0MDE2	CANLF	Coiled-coil domain-containing protein 43	Coiled-coil domain-containing protein 43 OS=Canis lupus familiaris OX=9615 PE=3 SV=1				42	NTNVEDVLNAR	G2B	2
0.292	32	849.455	849.522	0.0666	A0A5F4CIE3	CANLF	Histone H2A	Histone H2A OS=Canis lupus familiaris OX=9615 GN=H2AC15 PE=3 SV=1	2841	HLQLAIR	G2A	2																0.862	191	1220.64	1220.63	0.0047	A0A8C0SBE5	CANLF	40S ribosomal protein S4	40S ribosomal protein S4 OS=Canis lupus familiaris OX=9615 GN=RPS4X PE=3 SV=1				475	HPGSFDVVHVK	G2A	2
0.295	44	1013.45	1013.49	0.0384	A0A8C0MTI9	CANLF	Fibrinogen alpha chain	Fibrinogen alpha chain OS=Canis lupus familiaris OX=9615 GN=FGA PE=4 SV=1	1864	NSLFDYQK	G3A	3																0.862	363	1149.64	1149.65	0.0127	A0A8C0NQ71	CANLF	WAS/WASL interacting protein family member 1	WAS/WASL interacting protein family member 1 OS=Canis lupus familiaris OX=9615 PE=4 SV=1				259	ALPATPQLPSR	G1A	1
0.299	85	1025.45	1025.59	0.1418	A0A1B1X469	CANLF	ATP synthase subunit alpha	ATP synthase subunit alpha OS=Canis lupus familiaris OX=9615 GN=ATP5F1A PE=2 SV=1	1005	AVDSLVPIGR	G1B	1																0.855	1635	1138.64	1138.62	0.0266	A0A8C0M3C8	CANLF	Aminopeptidase	Aminopeptidase OS=Canis lupus familiaris OX=9615 PE=3 SV=1				30	LNLGTVGFYR	G2A	2
																												0.854	131	1217.64	1217.64	0.0045	A0A8C0NAG1	CANLF	ELAV-like protein	ELAV-like protein OS=Canis lupus familiaris OX=9615 PE=3 SV=1				678	DANLYISGLPR	G2B	2
0.842	52	867.454	867.478	0.0234	A0A8C0NK63	CANLF	Pyruvate kinase	Pyruvate kinase OS=Canis lupus familiaris OX=9615 GN=PARP6 PE=3 SV=1	1637	MQHLIAR	G1A	1																0.847	128	1139.64	1139.65	0.0023	A0A8C0PP72	CANLF	Ribosomal protein L18	Ribosomal protein L18 OS=Canis lupus familiaris OX=9615 GN=RPL18 PE=3 SV=1				724	TNRPPLSLSR	G1A	1
0.834	21	839.455	839.49	0.0351	A0A8C0RU77	CANLF	Transketolase	Transketolase OS=Canis lupus familiaris OX=9615 GN=TKT PE=4 SV=1	3805	LAVGEVPR	G3A	3																0.842	1261	1219.64	1219.64	0.0043	A0A8C0NRL7	CANLF	LIM domain containing preferred translocation partner in lipoma	LIM domain containing preferred translocation partner in lipoma OS=Canis lupus familiaris OX=9615 GN=LPP PE=4 SV=1				47	STGEPLGHVPAR	G3B	3
0.833	934	1266.64	1266.64	0.0021	A0A8C0P0P5	CANLF	Collagen beta(1-O)galactosyltransferase 1	Collagen beta(1-O)galactosyltransferase 1 OS=Canis lupus familiaris OX=9615 GN=COLGALT1 PE=3 SV=1	77	WSPESPLQAPR	G2A	2																0.841	1296	1164.64	1164.62	0.0255	A0A8C0PDB7	CANLF	Lysosomal associated membrane protein 1	Lysosomal associated membrane protein 1 OS=Canis lupus familiaris OX=9615 GN=LAMP1 PE=3 SV=1				46	ALQATIGNSYK	G1A	1
0.829	123	1458.63	1458.7	0.0701	A0A8C0PXB0	CANLF	Spectrin beta chain	Spectrin beta chain OS=Canis lupus familiaris OX=9615 GN=SPTBN1 PE=3 SV=1	741	DVEDEILWVGER	G2B	2																0.835	250	987.449	987.489	0.0399	A0A8C0T1Z7	CANLF	ATPase H+ transporting V1 subunit E1	ATPase H+ transporting V1 subunit E1 OS=Canis lupus familiaris OX=9615 GN=ATP6V1E1 PE=3 SV=1				385	ALSDADVQK	G2A	2
0.824	24	1584.82	1584.83	0.0071	A0A8I3NQW0	CANLF	Capping actin protein, gelsolin like	Capping actin protein, gelsolin like OS=Canis lupus familiaris OX=9615 GN=CAPG PE=4 SV=1	3570	YAPNTQVEILPQGR	G2A	2																0.835	408	1163.64	1163.59	0.0473	A0A8C0MPI8	CANLF	SWI/SNF related, matrix associated, actin dependent regulator of chromatin, subfamily a, member 5	SWI/SNF related, matrix associated, actin dependent regulator of chromatin, subfamily a, member 5 OS=Canis lupus familiaris OX=9615 GN=SMARCA5 PE=3 SV=1				232	QNLLSVGDYR	G2A	2
0.819	1418	1095.65	1095.65	0.0037	A0A8C0NXB5	CANLF	Microtubule actin crosslinking factor 1	Microtubule actin crosslinking factor 1 OS=Canis lupus familiaris OX=9615 GN=MACF1 PE=4 SV=1	40	ALLELVPWR	G2A	2																0.831	301	1204.64	1204.63	0.0123	A0A8C0NR61	CANLF	RNA-binding protein 14	RNA-binding protein 14 OS=Canis lupus familiaris OX=9615 GN=LOC610648 PE=4 SV=1				324	AQPSASLGVGYR	G1B	1
0.81	316	2215	2215.14	0.139	A0A8C0N9Q2	CANLF	Ras-related protein Rab-7a	Ras-related protein Rab-7a OS=Canis lupus familiaris OX=9615 GN=RAB7A PE=4 SV=1	306	DPENFPFVVLGNKIDLENR	G2A	2																0.827	84	1165.64	1165.64	0.0028	A0A8C0SV20	CANLF	Lumican	Lumican OS=Canis lupus familiaris OX=9615 GN=LUM PE=4 SV=1				1014	RFNGLQYLR	G3B	3
0.798	589	1406.63	1406.68	0.0483	A0A8C0MQK3	CANLF	60S ribosomal protein L27	60S ribosomal protein L27 OS=Canis lupus familiaris OX=9615 PE=3 SV=1	150	VYNYNHLMPTR	G3B	3																0.825	297	858.455	858.487	0.032	A0A8C0NIR4	CANLF	Myosin IF	Myosin IF OS=Canis lupus familiaris OX=9615 PE=3 SV=1				325	GSGDLAVLK	G2B	2
0.792	414	2216	2216.2	0.2016	A0A8C0NEF6	CANLF	Coiled-coil domain-containing protein 22	Coiled-coil domain-containing protein 22 OS=Canis lupus familiaris OX=9615 GN=CCDC22 PE=3 SV=1	228	EFQASPLLLPAPTQVPQPAGR	G3A	3																0.823	1317	1090.45	1090.56	0.119	A0A8C0NE69	CANLF	Early endosome antigen 1	Early endosome antigen 1 OS=Canis lupus familiaris OX=9615 PE=4 SV=1				45	LSASETSLQR	G2A	2
0.788	682	840.455	840.485	0.0302	A0A8C0MRB7	CANLF	Neutrophil cytosolic factor 4	Neutrophil cytosolic factor 4 OS=Canis lupus familiaris OX=9615 PE=4 SV=1	123	ALAQQLR	G3B	3																0.813	36	1116.44	1116.48	0.0408	A0A8C0TID4	CANLF	Heterogeneous nuclear ribonucleoprotein M	Heterogeneous nuclear ribonucleoprotein M OS=Canis lupus familiaris OX=9615 GN=HNRNPM PE=4 SV=1				2609	MGAGLGHGMDR	G2B	2
0.787	651	2130	2130.11	0.1108	A0A8C0NH53	CANLF	Septin 6	Septin 6 OS=Canis lupus familiaris OX=9615 GN=SEPTIN6 PE=3 SV=1	131	TAAELLQSQGSQAGGSQTLKR	G1A	1																0.809	7	1115.44	1115.57	0.129	A0A8C0MNE2	CANLF	Myosin-9	Myosin-9 OS=Canis lupus familiaris OX=9615 GN=MYH9 PE=3 SV=1				8891	DLGEELEALK	G3B	3
0.784	51	2131	2130.99	0.0064	A0A8C0NPN5	CANLF	14-3-3 domain-containing protein	14-3-3 domain-containing protein OS=Canis lupus familiaris OX=9615 PE=3 SV=1	1678	TAFDEAIAELDTLSEESYK	G2B	2																0.808	141	1098.65	1098.62	0.0275	A0A8C0QPV2	CANLF	RRM domain-containing protein	RRM domain-containing protein OS=Canis lupus familiaris OX=9615 PE=4 SV=1				628	AVVIVDDRGR	G1B	1
0.783	1384	953.451	953.463	0.0123	A0A8C0MY31	CANLF	Calumenin	Calumenin OS=Canis lupus familiaris OX=9615 GN=CALU PE=4 SV=1	41	EQFVEFR	G1B	1																0.808	1484	1127.64	1127.64	0.0069	A0A8C0M4B9	CANLF	Acetyl-CoA carboxylase kinase	Acetyl-CoA carboxylase kinase OS=Canis lupus familiaris OX=9615 PE=3 SV=1				36	VPFLVAETPR	G2A	2
0.783	264	1288.64	1288.64	0.0018	A0A8C0RH53	CANLF	Stress induced phosphoprotein 1	Stress induced phosphoprotein 1 OS=Canis lupus familiaris OX=9615 PE=4 SV=1	369	MEQVNELKEK	G3B	3																0.807	434	1049.45	1049.48	0.0336	A0A8C0QAV1	CANLF	Aconitase 1	Aconitase 1 OS=Canis lupus familiaris OX=9615 PE=3 SV=1				219	NQDLEFER	G2A	2
0.773	1019	1459.63	1459.67	0.0446	A0A8C0RLH3	CANLF	ILK associated serine/threonine phosphatase	ILK associated serine/threonine phosphatase OS=Canis lupus familiaris OX=9615 GN=ILKAP PE=3 SV=1	69	MDLFGDLPEPER	G2B	2																0.805	60	1050.45	1050.52	0.0727	A0A8C0NHS9	CANLF	Transitional endoplasmic reticulum ATPase	Transitional endoplasmic reticulum ATPase OS=Canis lupus familiaris OX=9615 GN=VCP PE=3 SV=1				1504	MDELQLFR	G3A	3
0.773	1249	1815.82	1815.84	0.0207	A0A8C0R9T3	CANLF	Charged multivesicular body protein 2A	Charged multivesicular body protein 2A OS=Canis lupus familiaris OX=9615 GN=CHMP2A PE=3 SV=1	48	AEAAASALVDADADLEER	G3B	3																0.802	385	974.45	974.524	0.0733	A0A8C0MPB4	CANLF	Dynactin subunit 2	Dynactin subunit 2 OS=Canis lupus familiaris OX=9615 GN=DCTN2 PE=3 SV=1				244	YADLPGIAR	G2A	2
0.772	1227	954.651	954.481	0.1705	A0A8C0MDE3	CANLF	Nucleosome assembly protein 1 like 1	Nucleosome assembly protein 1 like 1 OS=Canis lupus familiaris OX=9615 GN=NAP1L1 PE=3 SV=1	50	ADIDNLPR	G2B	2																0.802	141	832.456	832.441	0.0157	A0A8C0NGA6	CANLF	Non-POU domain containing octamer binding	Non-POU domain containing octamer binding OS=Canis lupus familiaris OX=9615 GN=NONO PE=4 SV=1				557	ALIEMEK	G2A	2
0.772	106	1094.45	1094.52	0.0766	A0A8C0PSX5	CANLF	Calcium-transporting ATPase	Calcium-transporting ATPase OS=Canis lupus familiaris OX=9615 GN=ATP2A1 PE=3 SV=1	845	MNVFNTDVR	G1A	1																0.801	13	988.449	988.574	0.1245	A0A8C0TQ44	CANLF	Histone H4	Histone H4 OS=Canis lupus familiaris OX=9615 GN=LOC483167 PE=3 SV=1				6181	VFLENVIR	G1A	1
0.77	646	1096.65	1096.63	0.0168	A0A8C0TPG8	CANLF	Spectrin alpha, erythrocytic 1	Spectrin alpha, erythrocytic 1 OS=Canis lupus familiaris OX=9615 PE=3 SV=1	133	LLTPEGAQIR	G1B	1																0.8	956	1214.64	1214.63	0.009	A0A8C0RH82	CANLF	Tyrosine-protein kinase	Tyrosine-protein kinase OS=Canis lupus familiaris OX=9615 GN=CSK PE=3 SV=1				75	LSLMPWFHGK	G2B	2
0.77	694	1816.82	1816.74	0.0783	A0A8C0TCU2	CANLF	Emerin	Emerin OS=Canis lupus familiaris OX=9615 GN=EMD PE=4 SV=1	119	GYGDDYYEESYLSTR	G3A	3																0.799	896	1233.64	1233.64	0.0011	A0A8C0M7N9	CANLF	Rad60/SUMO-like domain-containing protein	Rad60/SUMO-like domain-containing protein OS=Canis lupus familiaris OX=9615 GN=SUMO2 PE=4 SV=1				82	VAGQDGSVVQFK	G2A	2
0.767	222	2217	2217.02	0.0236	A0A8C0MPT3	CANLF	F-actin-capping protein subunit beta	F-actin-capping protein subunit beta OS=Canis lupus familiaris OX=9615 GN=CAPZB PE=3 SV=1	414	SPWSNKYDPPLEDGAMPSAR	G2A	2																0.796	716	1100.65	1100.64	0.0032	A0A8C0PIK7	CANLF	GTPase, IMAP family member 4	GTPase, IMAP family member 4 OS=Canis lupus familiaris OX=9615 GN=GIMAP4 PE=3 SV=1				116	MQLLTLVQR	G3A	3
0.766	1499	1453.63	1453.71	0.0828	A0A8C0NEA2	CANLF	Esterase OVCA2	Esterase OVCA2 OS=Canis lupus familiaris OX=9615 PE=3 SV=1	36	QAYLNFLDQLTE	G2B	2																0.795	171	1231.64	1231.64	0.0056	A0A8C0Q0M7	CANLF	EF-hand domain family member D2	EF-hand domain family member D2 OS=Canis lupus familiaris OX=9615 PE=4 SV=1				540	ATDELASKLSR	G1A	1
0.764	853	1120.64	1120.59	0.0556	A0A8C0NLV0	CANLF	SH3 domain containing GRB2 like, endophilin B1	SH3 domain containing GRB2 like, endophilin B1 OS=Canis lupus familiaris OX=9615 PE=4 SV=1	88	LAADAGTFLSR	G2B	2																0.794	20	965.45	965.492	0.0414	A0A8C0PB64	CANLF	Annexin	Annexin OS=Canis lupus familiaris OX=9615 GN=ANXA1 PE=3 SV=1				3981	AMVSEFLK	G3A	3
0.758	146	1239.64	1239.64	0.0028	A0A8C0PT97	CANLF	Bcl-2-like protein 2	Bcl-2-like protein 2 OS=Canis lupus familiaris OX=9615 GN=BCL2L2 PE=4 SV=1	616	AAAAAAAAAAGAAGGR	G3B	3																0.794	19	999.449	999.539	0.0895	A0A8C0PLP5	CANLF	Plectin	Plectin OS=Canis lupus familiaris OX=9615 GN=PLEC PE=4 SV=1				4148	QAEAELALR	G2B	2
0.755	114	2056.01	2056.08	0.0709	A0A8C0NXB1	CANLF	KH-type splicing regulatory protein	KH-type splicing regulatory protein OS=Canis lupus familiaris OX=9615 PE=4 SV=1	817	LASQGDSISSQLGPIHPPPR	G2A	2																0.793	7	1154.64	1154.66	0.0179	A0A8C0MNE2	CANLF	Myosin-9	Myosin-9 OS=Canis lupus familiaris OX=9615 GN=MYH9 PE=3 SV=1				8891	RGDLPFVVPR	G1B	1
0.752	142	1289.64	1289.67	0.031	A0A8C0MCJ9	CANLF	Stress-70 protein, mitochondrial	Stress-70 protein, mitochondrial OS=Canis lupus familiaris OX=9615 PE=3 SV=1	621	VQQTVQDLFGR	G2B	2																0.792	1224	1155.44	1155.56	0.121	A0A8C0MTB6	CANLF	Ubiquitin carboxyl-terminal hydrolase	Ubiquitin carboxyl-terminal hydrolase OS=Canis lupus familiaris OX=9615 GN=UCHL3 PE=3 SV=1				50	YLENYDAIR	G2B	2
0.751	661	1105.64	1105.63	0.0151	A0A8I3RZ20	CANLF	Pyrroline-5-carboxylate reductase	Pyrroline-5-carboxylate reductase OS=Canis lupus familiaris OX=9615 GN=PYCR3 PE=3 SV=1	129	AAAAALGPGPLR	G2A	2																0.791	184	1181.64	1181.64	0.0036	A0A8C0QGR9	CANLF	Vasodilator-stimulated phosphoprotein	Vasodilator-stimulated phosphoprotein OS=Canis lupus familiaris OX=9615 GN=VASP PE=3 SV=1				496	VPVPAQSETVR	G2B	2
0.751	739	1554.83	1554.76	0.069	A0A8C0NKG9	CANLF	Protein kinase cAMP-dependent type II regulatory subunit alpha	Protein kinase cAMP-dependent type II regulatory subunit alpha OS=Canis lupus familiaris OX=9615 PE=3 SV=1	110	GSFGELALMYNTPR	G2A	2																0.789	19	1077.45	1077.51	0.0668	A0A8C0PLP5	CANLF	Plectin	Plectin OS=Canis lupus familiaris OX=9615 GN=PLEC PE=4 SV=1				4148	LAEDEAFQR	G2B	2
0.749	626	1119.64	1119.58	0.0603	A0A8C0PGL3	CANLF	Complement C2	Complement C2 OS=Canis lupus familiaris OX=9615 GN=CFB PE=4 SV=1	137	LKNEDLEFL	G3B	3																0.788	66	1193.64	1193.63	0.0112	A0A8C0M6L4	CANLF	Cytosol aminopeptidase	Cytosol aminopeptidase OS=Canis lupus familiaris OX=9615 GN=LAP3 PE=3 SV=1				1309	GITFDSGGISIK	G2B	2
0.748	7	1553.83	1553.77	0.0518	A0A8C0MNE2	CANLF	Myosin-9	Myosin-9 OS=Canis lupus familiaris OX=9615 GN=MYH9 PE=3 SV=1	8891	AQQAADKYLYVDK	G2A	2																0.786	26	1221.64	1221.63	0.0123	A0A8P0PI75	CANLF	Keratin 75	Keratin 75 OS=Canis lupus familiaris OX=9615 GN=KRT75 PE=3 SV=1				2094	TAAENEFVTLK	G3B	3
0.746	626	1225.64	1225.64	0.0007	A0A8C0PGL3	CANLF	Complement C2	Complement C2 OS=Canis lupus familiaris OX=9615 GN=CFB PE=4 SV=1	137	YGLVTYATNPK	G3B	3																0.783	8	879.454	879.438	0.0167	A0A8C0NV01	CANLF	Albumin	Albumin OS=Canis lupus familiaris OX=9615 GN=ALB PE=4 SV=1				7315	ADFAEISK	G3B	3
0.744	1067	1748.82	1748.84	0.0194	A0A8C0LSC8	CANLF	GON7 subunit of KEOPS complex	GON7 subunit of KEOPS complex OS=Canis lupus familiaris OX=9615 GN=GON7 PE=4 SV=1	65	MELLGEYVGLDGQQR	G2A	2																0.782	92	1167.64	1167.63	0.0136	A0A8C0PAU8	CANLF	Lamin B1	Lamin B1 OS=Canis lupus familiaris OX=9615 PE=3 SV=1				938	ASAPATPLSPTR	G2A	2
0.742	113	1585.82	1585.83	0.0083	A0A8C0M449	CANLF	creatine kinase	creatine kinase OS=Canis lupus familiaris OX=9615 GN=CKB PE=3 SV=1	826	LAVEALSSLDGDLAGR	G3B	3																0.781	129	1053.45	1053.53	0.0818	A0A8C0MWQ8	CANLF	Hematopoietic cell-specific Lyn substrate 1	Hematopoietic cell-specific Lyn substrate 1 OS=Canis lupus familiaris OX=9615 PE=4 SV=1				710	GFGGQYGIQK	G2B	2
0.741	356	1407.63	1407.67	0.0408	A0A8C0RDD6	CANLF	Transgelin	Transgelin OS=Canis lupus familiaris OX=9615 GN=TAGLN PE=3 SV=1	264	GASQAGMTGYGRPR	G2B	2																0.78	130	1102.44	1102.51	0.0707	A0A8C0MFH9	CANLF	Transforming growth factor beta induced	Transforming growth factor beta induced OS=Canis lupus familiaris OX=9615 PE=4 SV=1				690	YGTLFTMDR	G3A	3
0.738	572	2132	2132.07	0.068	A0A8C0QGH7	CANLF	Fatty acid synthase	Fatty acid synthase OS=Canis lupus familiaris OX=9615 PE=4 SV=1	157	AAEQYTPQATYHGNVTLLR	G1A	1																0.779	7	998.449	998.559	0.1094	A0A8C0MNE2	CANLF	Myosin-9	Myosin-9 OS=Canis lupus familiaris OX=9615 GN=MYH9 PE=3 SV=1				8891	GDLPFVVPR	G3A	3
0.736	206	1110.64	1110.64	0.0001	A0A8C0N5B0	CANLF	60S ribosomal protein L27a	60S ribosomal protein L27a OS=Canis lupus familiaris OX=9615 PE=3 SV=1	453	TGAAPIIDVVR	G3A	3																0.777	147	1346.63	1346.61	0.0198	A0A8C0QNL8	CANLF	40S ribosomal protein S3a	40S ribosomal protein S3a OS=Canis lupus familiaris OX=9615 GN=RPS3A PE=3 SV=1				615	LMELHGEGSSSGK	G2A	2
0.736	106	1560.83	1560.83	0.0037	A0A8C0PSX5	CANLF	Calcium-transporting ATPase	Calcium-transporting ATPase OS=Canis lupus familiaris OX=9615 GN=ATP2A1 PE=3 SV=1	845	VGEATETALTTLVEK	G1B	1																0.776	47	1191.64	1191.64	0.0028	A0A8C0NRA6	CANLF	Ribosomal protein L24	Ribosomal protein L24 OS=Canis lupus familiaris OX=9615 GN=RPL24 PE=3 SV=1				1823	QINWTVLYR	G2A	2
0.736	1152	2057	2057	0.0075	A0A8C0NBD2	CANLF	SAM and SH3 domain containing 3	SAM and SH3 domain containing 3 OS=Canis lupus familiaris OX=9615 GN=SASH3 PE=4 SV=1	56	MALAFSEQEEHELPALSR	G2B	2																0.775	1395	1375.63	1375.7	0.0687	A0A8C0N1F3	CANLF	Pleckstrin homology domain containing A2	Pleckstrin homology domain containing A2 OS=Canis lupus familiaris OX=9615 GN=PLEKHA2 PE=4 SV=1				41	LGESSTSGVLPSSR	G2B	2
0.735	1097	1104.64	1104.59	0.0563	A0A8C0PHB9	CANLF	LIM domain and actin binding 1	LIM domain and actin binding 1 OS=Canis lupus familiaris OX=9615 GN=LIMA1 PE=4 SV=1	61	VGVLTASMEAK	G2B	2																0.773	566	1280.64	1280.66	0.0223	A0A8C0NPG3	CANLF	Actin related protein 3	Actin related protein 3 OS=Canis lupus familiaris OX=9615 PE=3 SV=1				159	NIVLSGGSTMFR	G2A	2
0.734	6	2041.01	2041	0.0081	A0A8P0TN04	CANLF	PDZ domain-containing protein	PDZ domain-containing protein OS=Canis lupus familiaris OX=9615 GN=AHNAK PE=4 SV=1	8719	VDVDVPDVDVHGPDWHLK	G2A	2																0.771	247	964.45	964.466	0.0163	A0A8C0N999	CANLF	60S ribosomal protein L4	60S ribosomal protein L4 OS=Canis lupus familiaris OX=9615 GN=RPL4 PE=3 SV=1				388	MLNTDLSR	G2B	2
0.734	305	2105	2104.98	0.0251	A0A8C0P1E8	CANLF	Poly(rC) binding protein 1	Poly(rC) binding protein 1 OS=Canis lupus familiaris OX=9615 GN=PCBP1 PE=4 SV=1	319	ESTGAQVQVAGDMLPNSTER	G2A	2																0.771	580	1048.65	1048.61	0.0399	A0A8C0Z3I7	CANLF	Ribosomal protein L37a	Ribosomal protein L37a OS=Canis lupus familiaris OX=9615 GN=RPL37A PE=3 SV=1				154	VGIVGKYGTR	G1B	1
0.733	305	2089	2088.98	0.0223	A0A8C0P1E8	CANLF	Poly(rC) binding protein 1	Poly(rC) binding protein 1 OS=Canis lupus familiaris OX=9615 GN=PCBP1 PE=4 SV=1	319	ESTGAQVQVAGDMLPNSTER	G2A	2																0.769	7	1347.63	1347.62	0.0109	A0A8C0MNE2	CANLF	Myosin-9	Myosin-9 OS=Canis lupus familiaris OX=9615 GN=MYH9 PE=3 SV=1				8891	DELADEIANSSGK	G3B	3
0.728	25	1561.83	1561.82	0.0063	A0A8I3MQC3	CANLF	Fructose-bisphosphate aldolase	Fructose-bisphosphate aldolase OS=Canis lupus familiaris OX=9615 GN=ALDOA PE=3 SV=1	3417	PYQYPALTPEQKK	G2A	2																0.769	1417	1047.65	1047.58	0.0639	A0A1U9XK90	CANLF	Mitsugumin 53	Mitsugumin 53 OS=Canis lupus familiaris OX=9615 PE=2 SV=1				40	LLPAAEAHAR	G1B	1
0.727	5	868.454	868.473	0.0187	MYH2	CANLF	Myosin-2	Myosin-2 OS=Canis lupus familiaris OX=9615 GN=MYH2 PE=3 SV=1	11617	ILYADFK	G1B	1																0.769	44	1013.45	1013.49	0.0384	A0A8C0MTI9	CANLF	Fibrinogen alpha chain	Fibrinogen alpha chain OS=Canis lupus familiaris OX=9615 GN=FGA PE=4 SV=1				1864	NSLFDYQK	G3A	3
0.727	136	2088	2088.01	0.0068	A0A8C0SIZ0	CANLF	F-actin-capping protein subunit alpha	F-actin-capping protein subunit alpha OS=Canis lupus familiaris OX=9615 GN=CAPZA1 PE=3 SV=1	650	FITHAPPGEFNEVFNDVR	G3A	3																0.768	1494	1355.63	1355.66	0.0223	A0A8C0NGE2	CANLF	DEK proto-oncogene	DEK proto-oncogene OS=Canis lupus familiaris OX=9615 PE=4 SV=1				36	NVGQFSGFPFEK	G2B	2
0.727	1446	2133	2133.11	0.105	A0A8C0NB32	CANLF	ATP-dependent RNA helicase	ATP-dependent RNA helicase OS=Canis lupus familiaris OX=9615 GN=DDX1 PE=3 SV=1	39	EAQTSFLHLGYLPNQLFR	G2A	2																0.767	342	1183.64	1183.66	0.0234	A0A8C0LZY0	CANLF	40S ribosomal protein S17	40S ribosomal protein S17 OS=Canis lupus familiaris OX=9615 PE=3 SV=1				273	VIIEKYYTR	G1B	1
0.725	43	1121.64	1121.64	0.0015	A0A8C0MM64	CANLF	Endoplasmin	Endoplasmin OS=Canis lupus familiaris OX=9615 GN=HSP90B1 PE=3 SV=1	1552	HPLIKDMLR	G2A	2																0.765	924	809.457	809.516	0.0587	A0A8I3PXF9	CANLF	SAM domain-containing protein	SAM domain-containing protein OS=Canis lupus familiaris OX=9615 GN=SAMD1 PE=4 SV=1				78	LGALALPR	G1B	1
0.725	211	1575.83	1575.86	0.0383	A0A8C0MI54	CANLF	Formin like 1	Formin like 1 OS=Canis lupus familiaris OX=9615 GN=FMNL1 PE=3 SV=1	445	RPPGPPLQVTSDLSL	G2B	2																0.764	42	1166.64	1166.65	0.0034	A0A8C0S817	CANLF	IF rod domain-containing protein	IF rod domain-containing protein OS=Canis lupus familiaris OX=9615 GN=KRT13 PE=3 SV=1				1223	VVSTHEQVLR	G3A	3
0.723	608	1267.64	1267.65	0.0105	A0A8C0N6F6	CANLF	Proteasome activator subunit 1	Proteasome activator subunit 1 OS=Canis lupus familiaris OX=9615 GN=PSME1 PE=3 SV=1	142	TENLLGSYFPK	G2A	2																0.763	657	837.456	837.417	0.0394	A0A8C0QET2	CANLF	Transmembrane protein 256	Transmembrane protein 256 OS=Canis lupus familiaris OX=9615 GN=TMEM256 PE=3 SV=1				131	AGFGAAFR	G2B	2
0.72	1091	2003.01	2003	0.0031	A0A8C0N5D2	CANLF	Proteasome subunit beta	Proteasome subunit beta OS=Canis lupus familiaris OX=9615 GN=PSMB1 PE=3 SV=1	62	AGGSASAMLQPLLDNQVGFK	G3B	3																0.763	134	1103.44	1103.53	0.0879	A0A8C0MHZ2	CANLF	Elastin microfibril interfacer 1	Elastin microfibril interfacer 1 OS=Canis lupus familiaris OX=9615 GN=EMILIN1 PE=4 SV=1				659	SEPGTVPFDR	G2A	2
0.719	51	2040.01	2039.98	0.0227	A0A8C0NPN5	CANLF	14-3-3 domain-containing protein	14-3-3 domain-containing protein OS=Canis lupus familiaris OX=9615 PE=3 SV=1	1678	GIVDQSQQAYQEAFEISK	G3B	3																0.762	317	989.449	989.495	0.046	A0A7R6QAQ7	CANLF	DLA class II antigen	DLA class II antigen OS=Canis lupus familiaris OX=9615 PE=2 SV=1				78	SFDPQGALR	G3B	3
0.713	27	1817.82	1818.01	0.1903	A0A8I3PHI4	CANLF	Fibronectin	Fibronectin OS=Canis lupus familiaris OX=9615 GN=FN1 PE=4 SV=1	3306	GATYNIIVEALKDQKR	G2B	2																0.76	1083	1194.64	1194.64	0.0005	A0A8C0P334	CANLF	non-specific serine/threonine protein kinase	non-specific serine/threonine protein kinase OS=Canis lupus familiaris OX=9615 GN=RPS6KA3 PE=3 SV=1				63	NQSPVLEPVGR	G2A	2
0.71	107	851.455	851.526	0.0711	A0A8C0ME72	CANLF	Clathrin heavy chain	Clathrin heavy chain OS=Canis lupus familiaris OX=9615 GN=CLTC PE=3 SV=1	843	AQILPIR	G2A	2																0.758	178	1207.64	1207.66	0.0183	A0A8C0MIM6	CANLF	Apolipoprotein A-IV	Apolipoprotein A-IV OS=Canis lupus familiaris OX=9615 GN=APOA4 PE=3 SV=1				515	LLPHASEVSQK	G3B	3
0.708	1206	1210.64	1210.62	0.018	A0A8C0M571	CANLF	Protein kinase C and casein kinase substrate in neurons 2	Protein kinase C and casein kinase substrate in neurons 2 OS=Canis lupus familiaris OX=9615 PE=3 SV=1	51	ADPSLNPEQLK	G2B	2																0.755	82	1010.45	1010.54	0.0891	A0A8C0NKZ2	CANLF	RNA helicase	RNA helicase OS=Canis lupus familiaris OX=9615 PE=3 SV=1				1031	LMQLVDHR	G2B	2
0.708	43	1559.83	1559.83	0.0062	A0A8C0M536	CANLF	Heat shock protein 90 alpha family class A member 1	Heat shock protein 90 alpha family class A member 1 OS=Canis lupus familiaris OX=9615 PE=3 SV=1	1726	ELISNSSDALDKIR	G2A	2																0.754	42	1064.45	1064.52	0.0704	A0A8C0PK81	CANLF	IF rod domain-containing protein	IF rod domain-containing protein OS=Canis lupus familiaris OX=9615 GN=KRT18 PE=3 SV=1				115	AQYDELAQK	G1A	1
0.707	5	2042.01	2042.01	0.0093	MYH2	CANLF	Myosin-2	Myosin-2 OS=Canis lupus familiaris OX=9615 GN=MYH2 PE=3 SV=1	11617	TLAYLFSGAQTAEAEASGGAK	G1B	1																0.753	85	1025.45	1025.59	0.1418	A0A1B1X469	CANLF	ATP synthase subunit alpha	ATP synthase subunit alpha OS=Canis lupus familiaris OX=9615 GN=ATP5F1A PE=2 SV=1				1005	AVDSLVPIGR	G1B	1
0.706	82	1454.63	1454.68	0.0501	A0A8C0NKZ2	CANLF	RNA helicase	RNA helicase OS=Canis lupus familiaris OX=9615 PE=3 SV=1	1031	SSQSSSQQFSGIGR	G3A	3																0.751	35	744.259	744.46	0.2012	A0A8C0Z1Y0	CANLF	Annexin	Annexin OS=Canis lupus familiaris OX=9615 PE=3 SV=1				2644	LMVALAK	G2B	2
0.704	874	1576.83	1576.83	0.0031	A0A8C0P2Q4	CANLF	40S ribosomal protein S27	40S ribosomal protein S27 OS=Canis lupus familiaris OX=9615 GN=RPS27 PE=3 SV=1	64	DLLHPSPEEEKRK	G2A	2																0.75	141	1227.64	1227.64	0.003	A0A8C0NGA6	CANLF	Non-POU domain containing octamer binding	Non-POU domain containing octamer binding OS=Canis lupus familiaris OX=9615 GN=NONO PE=4 SV=1				557	AAPGAEFAPNKR	G1A	1
0.704	4	2002.01	2002.01	0.0001	A0A8C0LRY0	CANLF	Collagen type I alpha 1 chain	Collagen type I alpha 1 chain OS=Canis lupus familiaris OX=9615 PE=4 SV=1	13672	NGDRGETGPAGPAGPIGPVGAR	G2A	2																0.75	19	1148.64	1148.62	0.0173	A0A8C0PLP5	CANLF	Plectin	Plectin OS=Canis lupus familiaris OX=9615 GN=PLEC PE=4 SV=1				4148	AGLVGPELHEK	G3A	3
0.702	609	1209.64	1209.64	0.0051	A0A8C0NXA3	CANLF	Ubiquinol-cytochrome c reductase core protein 1	Ubiquinol-cytochrome c reductase core protein 1 OS=Canis lupus familiaris OX=9615 GN=UQCRC1 PE=4 SV=1	142	MVLAAAGGVEHR	G2A	2																0.749	595	950.451	950.474	0.023	A0A8C0SKU0	CANLF	ADP/ATP translocase	ADP/ATP translocase OS=Canis lupus familiaris OX=9615 GN=SLC25A5 PE=3 SV=1				148	TDAAVSFAK	G2B	2
0.701	448	1466.63	1466.66	0.0303	A0A8C0MNK1	CANLF	Splicing factor 3b subunit 1	Splicing factor 3b subunit 1 OS=Canis lupus familiaris OX=9615 GN=SF3B1 PE=3 SV=1	207	DTPGHGSGWAETPR	G3A	3																0.749	1696	859.455	859.46	0.0044	A0A8C0SQ47	CANLF	SS18 subunit of BAF chromatin remodeling complex	SS18 subunit of BAF chromatin remodeling complex OS=Canis lupus familiaris OX=9615 GN=SS18 PE=3 SV=1				28	SVAFAAPR	G3B	3
0.7	17	2104	2104	0.0035	A0A8C0NS77	CANLF	Collagen type VI alpha 3 chain	Collagen type VI alpha 3 chain OS=Canis lupus familiaris OX=9615 GN=COL6A3 PE=4 SV=1	5036	MKPMEGSVLYTGSALDFAR	G1A	1																0.745	580	1142.44	1142.59	0.1422	A0A8C0Z3I7	CANLF	Ribosomal protein L37a	Ribosomal protein L37a OS=Canis lupus familiaris OX=9615 GN=RPL37A PE=3 SV=1				154	YGTRYGASLR	G2B	2
																												0.743	1420	1182.64	1182.61	0.031	A0A8C0RI14	CANLF	Transcription factor A, mitochondrial	Transcription factor A, mitochondrial OS=Canis lupus familiaris OX=9615 GN=TFAM PE=4 SV=1				40	SAYNIFIAER	G2A	2
																												0.741	88	1024.45	1024.5	0.0529	A0A8C0Q5H2	CANLF	Myosin light chain 6	Myosin light chain 6 OS=Canis lupus familiaris OX=9615 GN=MYL6 PE=4 SV=1				648	EAFQLFDR	G2B	2
																												0.74	1523	1124.64	1124.65	0.0023	A0A8C0M0I8	CANLF	Prefoldin subunit 1	Prefoldin subunit 1 OS=Canis lupus familiaris OX=9615 PE=3 SV=1				35	AAPVDLELKK	G2B	2
																												0.739	572	845.255	845.478	0.2231	A0A8C0QGH7	CANLF	Fatty acid synthase	Fatty acid synthase OS=Canis lupus familiaris OX=9615 PE=4 SV=1				157	AGLYGLPR	G1A	1
																												0.739	915	972.45	972.492	0.0423	A0A8C0NPW7	CANLF	RNA-binding protein 14	RNA-binding protein 14 OS=Canis lupus familiaris OX=9615 GN=LOC610648 PE=4 SV=1				79	AEDAVEAIR	G2A	2
																												0.737	80	1208.44	1208.57	0.1288	A0A8C0NCH8	CANLF	Matrin 3	Matrin 3 OS=Canis lupus familiaris OX=9615 GN=MATR3 PE=4 SV=1				1060	TEEGPTLSYGR	G2A	2
																												0.735	807	1088.45	1088.49	0.0472	A0A5F4BNM9	CANLF	Galectin	Galectin OS=Canis lupus familiaris OX=9615 GN=LGALS1 PE=2 SV=1				95	DGGAWGEELR	G2A	2
																												0.733	85	722.46	722.446	0.0144	A0A1B1X469	CANLF	ATP synthase subunit alpha	ATP synthase subunit alpha OS=Canis lupus familiaris OX=9615 GN=ATP5F1A PE=2 SV=1				1005	APGIIPR	G1B	1
																												0.733	236	873.454	873.495	0.0408	A0A8C0MY55	CANLF	Wiskott-Aldrich syndrome protein family member	Wiskott-Aldrich syndrome protein family member OS=Canis lupus familiaris OX=9615 GN=WASF2 PE=3 SV=1				400	SDLLSAIR	G2B	2
																												0.73	32	1117.44	1117.55	0.1091	A0A8C0MLN7	CANLF	Histone H2A	Histone H2A OS=Canis lupus familiaris OX=9615 GN=H2AFV PE=3 SV=1				593	GDEELDSLIK	G3B	3
																												0.729	91	1474.63	1474.74	0.1103	A0A8C0SPN7	CANLF	Polypyrimidine tract binding protein 3	Polypyrimidine tract binding protein 3 OS=Canis lupus familiaris OX=9615 PE=4 SV=1				110	SQPVFIQYSNHR	G2A	2
																												0.729	747	1213.64	1213.63	0.0098	A0A8C0PJI4	CANLF	Acetyl-coenzyme A synthetase	Acetyl-coenzyme A synthetase OS=Canis lupus familiaris OX=9615 PE=3 SV=1				108	EPAAFWGPLAR	G2B	2
																												0.727	1657	1075.45	1075.47	0.0194	A0A8C0M0M8	CANLF	LSM14A mRNA processing body assembly factor	LSM14A mRNA processing body assembly factor OS=Canis lupus familiaris OX=9615 GN=LSM14A PE=3 SV=1				29	EFADFEYR	G2B	2
																												0.727	1483	1126.64	1126.64	0.0041	A0A8C0MIJ2	CANLF	EF-hand domain-containing protein	EF-hand domain-containing protein OS=Canis lupus familiaris OX=9615 PE=4 SV=1				36	LSPQAVNSIAK	G2A	2
																												0.726	934	929.652	929.538	0.1146	A0A8C0P0P5	CANLF	Collagen beta(1-O)galactosyltransferase 1	Collagen beta(1-O)galactosyltransferase 1 OS=Canis lupus familiaris OX=9615 GN=COLGALT1 PE=3 SV=1				77	TPAYIPIR	G2B	2
																												0.725	29	1188.64	1188.63	0.0128	A0A5F4CSK0	CANLF	Tropomyosin 3	Tropomyosin 3 OS=Canis lupus familiaris OX=9615 GN=TPM3 PE=3 SV=1				3072	TIDDLEDKLK	G3B	3
																												0.725	1140	1278.64	1278.63	0.0089	A0A8C0NZG4	CANLF	Adducin 3	Adducin 3 OS=Canis lupus familiaris OX=9615 GN=ADD3 PE=3 SV=1				57	VGEIEFEGLMR	G2A	2
																												0.724	16	951.451	951.469	0.0174	A0A8C0NGQ5	CANLF	Filamin A	Filamin A OS=Canis lupus familiaris OX=9615 PE=3 SV=1				5160	AEFTVETR	G2B	2
																												0.724	283	883.454	883.48	0.0255	A0A8C0MXC8	CANLF	Myosin binding protein C, slow type	Myosin binding protein C, slow type OS=Canis lupus familiaris OX=9615 GN=MYBPC1 PE=4 SV=1				344	VAIVDDPR	G1B	1
																												0.723	1405	935.451	935.493	0.0418	A0A8C0LZ39	CANLF	ERCC excision repair 8, CSA ubiquitin ligase complex subunit	ERCC excision repair 8, CSA ubiquitin ligase complex subunit OS=Canis lupus familiaris OX=9615 GN=ERCC8 PE=4 SV=1				40	MLGFLSAR	G2A	2
																												0.721	26	1011.45	1011.5	0.0556	A0A8C0T114	CANLF	Keratin 75	Keratin 75 OS=Canis lupus familiaris OX=9615 PE=3 SV=1				977	SGFSSVSVSR	G3A	3
																												0.721	2	997.449	997.482	0.033	ACTB	CANLF	Actin, cytoplasmic 1	Actin, cytoplasmic 1 OS=Canis lupus familiaris OX=9615 GN=ACTB PE=2 SV=3				15866	DLTDYLMK	G3A	3
																												0.72	109	928.652	928.563	0.0887	A0A8C0N6L0	CANLF	Ribosomal protein L3	Ribosomal protein L3 OS=Canis lupus familiaris OX=9615 PE=3 SV=1				839	ALEKIDLK	G2B	2
																												0.72	1402	884.454	884.442	0.0119	A0A8C0RQG4	CANLF	MOB kinase activator 1A	MOB kinase activator 1A OS=Canis lupus familiaris OX=9615 GN=MOB1A PE=4 SV=1				41	SFLFSSR	G3A	3
																												0.72	1141	1038.45	1038.49	0.0382	A0A8C0PFQ2	CANLF	V-type proton ATPase subunit F	V-type proton ATPase subunit F OS=Canis lupus familiaris OX=9615 GN=ATP6V1F PE=3 SV=1				57	GMFTAEDLR	G2B	2
																												0.719	1008	1114.64	1114.63	0.0158	A0A8C0MQK8	CANLF	U2A~/phosphoprotein 32 family A C-terminal domain-containing protein	U2A~/phosphoprotein 32 family A C-terminal domain-containing protein OS=Canis lupus familiaris OX=9615 PE=3 SV=1				69	ISGGLEVLAEK	G2B	2
																												0.718	288	1071.65	1071.56	0.0856	A0A8C0M1F4	CANLF	Alpha-1-B glycoprotein	Alpha-1-B glycoprotein OS=Canis lupus familiaris OX=9615 GN=A1BG PE=4 SV=1				333	QGEEELLVR	G3B	3
																												0.716	19	863.454	863.454	0.0004	A0A8C0PLP5	CANLF	Plectin	Plectin OS=Canis lupus familiaris OX=9615 GN=PLEC PE=4 SV=1				4148	FAEQTLR	G3A	3
																												0.714	54	1054.45	1054.54	0.0897	A0A8C0MES4	CANLF	Peptidyl-prolyl cis-trans isomerase	Peptidyl-prolyl cis-trans isomerase OS=Canis lupus familiaris OX=9615 PE=3 SV=1				1607	VSFELFADK	G3A	3
																												0.714	1099	880.454	880.589	0.1347	A0A8I3S508	CANLF	TAP binding protein	TAP binding protein OS=Canis lupus familiaris OX=9615 GN=TAPBP PE=4 SV=1				61	KPAALLLR	G2A	2
																												0.714	1587	1076.45	1076.61	0.1685	A0A8C0PUF7	CANLF	Nucleobindin 2	Nucleobindin 2 OS=Canis lupus familiaris OX=9615 PE=3 SV=1				32	LVTLDEFLK	G2B	2
																												0.714	482	1421.63	1421.6	0.0292	A0A8C0P027	CANLF	Thyroid hormone receptor associated protein 3	Thyroid hormone receptor associated protein 3 OS=Canis lupus familiaris OX=9615 GN=THRAP3 PE=3 SV=1				191	EEEWDPEYTPK	G2A	2
																												0.712	108	821.456	821.504	0.0477	A0A8I3NL88	CANLF	Protein disulfide-isomerase A4	Protein disulfide-isomerase A4 OS=Canis lupus familiaris OX=9615 GN=PDIA4 PE=3 SV=1				842	SPPIPLAK	G2B	2
																												0.709	247	948.451	948.474	0.0224	A0A8C0N999	CANLF	60S ribosomal protein L4	60S ribosomal protein L4 OS=Canis lupus familiaris OX=9615 GN=RPL4 PE=3 SV=1				388	MLNTDLSR	G1A	1
																												0.709	609	1066.45	1066.54	0.0888	A0A8C0NXA3	CANLF	Ubiquinol-cytochrome c reductase core protein 1	Ubiquinol-cytochrome c reductase core protein 1 OS=Canis lupus familiaris OX=9615 GN=UQCRC1 PE=4 SV=1				142	ADLTEYLSR	G3A	3
																												0.703	769	993.649	993.54	0.1093	A0A8C0QGD9	CANLF	propionate--CoA ligase	propionate--CoA ligase OS=Canis lupus familiaris OX=9615 PE=3 SV=1				102	SAHVPSLQR	G2B	2
																												0.702	1365	834.456	834.548	0.0913	A0A8C0N0J5	CANLF	Myoferlin	Myoferlin OS=Canis lupus familiaris OX=9615 GN=MYOF PE=3 SV=1				43	LALHILR	G2A	2
																												0.702	204	973.45	973.501	0.0511	A0A8C0RKE1	CANLF	Proteasome subunit beta type-8	Proteasome subunit beta type-8 OS=Canis lupus familiaris OX=9615 GN=PSMB8 PE=4 SV=1				456	QEPQLFGR	G3A	3
																												0.701	298	1026.45	1026.59	0.1374	A0A8C0NB29	CANLF	Fatty acid binding protein 5	Fatty acid binding protein 5 OS=Canis lupus familiaris OX=9615 PE=3 SV=1				325	ATIQQLVGR	G2B	2
																												0.701	6	1141.64	1141.64	0.0039	A0A8P0TN04	CANLF	PDZ domain-containing protein	PDZ domain-containing protein OS=Canis lupus familiaris OX=9615 GN=AHNAK PE=4 SV=1				8719	VKGDVDVSVPK	G2A	2

## Sheet: Lymphocyte enriched
Lymphocyte enriched areas
2 vs 3
ROC_L2vsL3	Protein Hit Number	MALDI_mass	ESI_mass	Distance	Protein Accession		Protein name	Protein Description	Protein Score	Peptide Sequence	Peptide Scan	Stage
0.132	1227	954.651	954.481	0.1705	A0A8C0MDE3	CANLF	Nucleosome assembly protein 1 like 1	Nucleosome assembly protein 1 like 1 OS=Canis lupus familiaris OX=9615 GN=NAP1L1 PE=3 SV=1	50	ADIDNLPR	G2B	2
0.138	163	942.651	942.568	0.0829	A0A8C0SIY9	CANLF	RRM domain-containing protein	RRM domain-containing protein OS=Canis lupus familiaris OX=9615 PE=3 SV=1	562	VPPPPPIAR	G2B	2
0.144	1086	943.451	943.491	0.0395	A0A8C0MKV5	CANLF	Protein 4.1	Protein 4.1 OS=Canis lupus familiaris OX=9615 GN=EPB41 PE=4 SV=1	63	LSTHSPFR	G1A	1
0.149	682	840.455	840.485	0.0302	A0A8C0MRB7	CANLF	Neutrophil cytosolic factor 4	Neutrophil cytosolic factor 4 OS=Canis lupus familiaris OX=9615 PE=4 SV=1	123	ALAQQLR	G3B	3
0.152	235	1027.45	1027.49	0.0401	A0A8C0MXP1	CANLF	Serine/arginine-rich splicing factor 1	Serine/arginine-rich splicing factor 1 OS=Canis lupus familiaris OX=9615 GN=SRSF1 PE=3 SV=1	403	DIEDVFYK	G2A	2
0.156	584	944.451	944.494	0.0426	A0A8C0MZC6	CANLF	Coiled-coil-helix-coiled-coil-helix domain containing 3	Coiled-coil-helix-coiled-coil-helix domain containing 3 OS=Canis lupus familiaris OX=9615 GN=CHCHD3 PE=4 SV=1	152	LSENVIDR	G1A	1
0.169	1176	955.651	955.586	0.0655	A0A8C0N6L2	CANLF	Nucleoside diphosphate kinase	Nucleoside diphosphate kinase OS=Canis lupus familiaris OX=9615 PE=3 SV=1	53	GLVGDIVKR	G3A	3
0.171	1266	814.456	814.494	0.0378	A0A1S7J0A8	CANLF	Monocyte differentiation antigen CD14	Monocyte differentiation antigen CD14 OS=Canis lupus familiaris OX=9615 GN=607076 PE=2 SV=1	47	LSVLDLR	G2A	2
0.173	132	1028.45	1028.53	0.0856	A0A8C0MPB0	CANLF	Potassium channel tetramerization domain containing 12	Potassium channel tetramerization domain containing 12 OS=Canis lupus familiaris OX=9615 GN=KCTD12 PE=4 SV=1	671	SGYITIGYR	G2A	2
0.184	21	839.455	839.49	0.0351	A0A8C0RU77	CANLF	Transketolase	Transketolase OS=Canis lupus familiaris OX=9615 GN=TKT PE=4 SV=1	3805	LAVGEVPR	G3A	3
0.186	170	816.456	816.418	0.038	A0A8I3PE72	CANLF	Titin OS	Titin OS=Canis lupus familiaris OX=9615 GN=TTN PE=3 SV=1	542	MPVSDLR	G1B	1
0.186	21	1577.83	1577.81	0.0191	A0A8C0RU77	CANLF	Transketolase	Transketolase OS=Canis lupus familiaris OX=9615 GN=TKT PE=4 SV=1	3805	MFGIDRDAIAQAVR	G2B	2
0.188	1153	842.455	842.478	0.0229	A0A8C0P051	CANLF	Protein tyrosine phosphatase receptor type C associated protein	Protein tyrosine phosphatase receptor type C associated protein OS=Canis lupus familiaris OX=9615 PE=4 SV=1	56	LGAALWGR	G3A	3
0.19	109	928.652	928.563	0.0887	A0A8C0N6L0	CANLF	Ribosomal protein L3	Ribosomal protein L3 OS=Canis lupus familiaris OX=9615 PE=3 SV=1	839	ALEKIDLK	G2B	2
0.194	796	956.651	956.569	0.0818	A0A8C0P2N6	CANLF	Ribonucleoprotein, PTB binding 1	Ribonucleoprotein, PTB binding 1 OS=Canis lupus familiaris OX=9615 GN=RAVER1 PE=4 SV=1	97	LLSPLASTR	G2B	2
0.194	1023	957.45	957.505	0.0553	A0A8C0PGP5	CANLF	Transglutaminase 2	Transglutaminase 2 OS=Canis lupus familiaris OX=9615 PE=3 SV=1	68	AEDLVLEK	G3B	3
0.205	141	785.458	785.478	0.02	A0A8C0QPV2	CANLF	RRM domain-containing protein	RRM domain-containing protein OS=Canis lupus familiaris OX=9615 PE=4 SV=1	628	ANLSLLR	G2B	2
0.207	26	945.451	945.46	0.009	A0A8C0NY99	CANLF	Keratin, type II cytoskeletal 1	Keratin, type II cytoskeletal 1 OS=Canis lupus familiaris OX=9615 GN=KRT1 PE=3 SV=1	2037	FVSTSYSR	G1B	1
0.215	978	1567.63	1567.77	0.1435	A0A8C0NUW2	CANLF	Actin like 6A	Actin like 6A OS=Canis lupus familiaris OX=9615 PE=3 SV=1	72	QGGPTYYIDTNALR	G2A	2
0.222	6	914.452	914.473	0.0205	A0A8P0TN04	CANLF	PDZ domain-containing protein	PDZ domain-containing protein OS=Canis lupus familiaris OX=9615 GN=AHNAK PE=4 SV=1	8719	GDVDVSVPK	G3A	3
0.222	931	1655.82	1655.86	0.0351	A0A8C0PAM2	CANLF	Pre-mRNA processing factor 4	Pre-mRNA processing factor 4 OS=Canis lupus familiaris OX=9615 PE=4 SV=1	77	ALGEPITLFGEGPAER	G2B	2
0.226	1094	1399.63	1399.62	0.0116	A0A8C0TGA7	CANLF	KH RNA binding domain containing, signal transduction associated 1	KH RNA binding domain containing, signal transduction associated 1 OS=Canis lupus familiaris OX=9615 PE=3 SV=1	62	SGSMDPSGAHPSVR	G1B	1
0.227	504	970.45	970.525	0.0744	A0A8C0M3L6	CANLF	Apolipoprotein E	Apolipoprotein E OS=Canis lupus familiaris OX=9615 PE=3 SV=1	182	ADALGQQLR	G1B	1
0.23	17	984.449	984.491	0.0418	A0A8C0NS77	CANLF	Collagen type VI alpha 3 chain	Collagen type VI alpha 3 chain OS=Canis lupus familiaris OX=9615 GN=COL6A3 PE=4 SV=1	5036	ELPNIEDR	G2A	2
0.23	943	915.452	915.469	0.0168	A0A8C0P051	CANLF	G protein subunit beta 2	G protein subunit beta 2 OS=Canis lupus familiaris OX=9615 GN=GNB2 PE=3 SV=1	77	SELEQLR	G1B	1
0.23	129	1324.64	1324.65	0.0134	A0A8C0MWQ8	CANLF	Hematopoietic cell-specific Lyn substrate 1	Hematopoietic cell-specific Lyn substrate 1 OS=Canis lupus familiaris OX=9615 PE=4 SV=1	710	AKFESMAEEKR	G2B	2
0.231	312	1400.63	1400.68	0.0527	A0A8C0S7T9	CANLF	protein-tyrosine-phosphatase	protein-tyrosine-phosphatase OS=Canis lupus familiaris OX=9615 PE=4 SV=1	307	NSYIIPYDFNR	G3A	3
0.232	934	929.652	929.538	0.1146	A0A8C0P0P5	CANLF	Collagen beta(1-O)galactosyltransferase 1	Collagen beta(1-O)galactosyltransferase 1 OS=Canis lupus familiaris OX=9615 GN=COLGALT1 PE=3 SV=1	77	TPAYIPIR	G2B	2
0.235	102	1325.64	1325.69	0.0572	A0A8C0NG77	CANLF	Stathmin	Stathmin OS=Canis lupus familiaris OX=9615 GN=STMN1 PE=3 SV=1	858	ESVPEFPLSPPK	G1B	1
0.239	548	900.453	900.489	0.0362	A0A8C0NRD9	CANLF	Bifunctional purine biosynthesis protein ATIC	Bifunctional purine biosynthesis protein ATIC OS=Canis lupus familiaris OX=9615 GN=ATIC PE=3 SV=1	164	GISQMPLR	G1A	1
0.239	247	981.649	981.613	0.0358	A0A8C0N999	CANLF	60S ribosomal protein L4	60S ribosomal protein L4 OS=Canis lupus familiaris OX=9615 GN=RPL4 PE=3 SV=1	388	KNPLKNLR	G2A	2
0.24	224	931.452	931.543	0.0905	A0A8C0SGZ1	CANLF	Fibrinogen beta chain	Fibrinogen beta chain OS=Canis lupus familiaris OX=9615 GN=FGB PE=4 SV=1	413	IRPFFPR	G3B	3
0.241	19	1029.45	1029.54	0.0923	A0A8C0PLP5	CANLF	Plectin	Plectin OS=Canis lupus familiaris OX=9615 GN=PLEC PE=4 SV=1	4148	QELEAELAK	G2A	2
0.249	7	1553.83	1553.77	0.0518	A0A8C0MNE2	CANLF	Myosin-9	Myosin-9 OS=Canis lupus familiaris OX=9615 GN=MYH9 PE=3 SV=1	8891	AQQAADKYLYVDK	G2A	2
0.251	103	969.65	969.59	0.0606	A0A8C0RBJ1	CANLF	40S ribosomal protein S19	40S ribosomal protein S19 OS=Canis lupus familiaris OX=9615 GN=RPS19 PE=3 SV=1	858	VLQALEGLK	G1A	1
0.251	66	991.449	991.462	0.0123	A0A8C0M6L4	CANLF	Cytosol aminopeptidase	Cytosol aminopeptidase OS=Canis lupus familiaris OX=9615 GN=LAP3 PE=3 SV=1	1309	AAANMDLMR	G3A	3
0.256	19	930.452	930.516	0.0638	A0A8C0PLP5	CANLF	Plectin	Plectin OS=Canis lupus familiaris OX=9615 GN=PLEC PE=4 SV=1	4148	LAAISEATR	G2A	2
0.258	1	1494.83	1494.78	0.0436	A0A8C0N8E3	CANLF	IF rod domain-containing protein	IF rod domain-containing protein OS=Canis lupus familiaris OX=9615 GN=VIM PE=3 SV=1	20959	TYSLGSALRPSTSR	G2A	2
0.264	243	1006.65	1006.61	0.0378	A0A8C0NQB7	CANLF	60S ribosomal protein L18a	60S ribosomal protein L18a OS=Canis lupus familiaris OX=9615 GN=RPL18A PE=3 SV=1	395	IKFPLPHR	G2B	2
0.264	316	2215	2215.14	0.139	A0A8C0N9Q2	CANLF	Ras-related protein Rab-7a	Ras-related protein Rab-7a OS=Canis lupus familiaris OX=9615 GN=RAB7A PE=4 SV=1	306	DPENFPFVVLGNKIDLENR	G2A	2
0.265	112	1045.65	1045.6	0.0514	A0A8C0Z1U8	CANLF	Collagen type VI alpha 1 chain	Collagen type VI alpha 1 chain OS=Canis lupus familiaris OX=9615 GN=COL6A1 PE=4 SV=1	834	VPSYQALLR	G1B	1
0.266	153	1465.63	1465.68	0.0533	A0A8C0NUP7	CANLF	Prothymosin alpha OS=Canis lupus familiaris	Prothymosin alpha OS=Canis lupus familiaris OX=9615 GN=PTMA PE=3 SV=1	594	SDAAVDTSSEITTK	G2B	2
0.267	1206	1210.64	1210.62	0.018	A0A8C0M571	CANLF	Protein kinase C and casein kinase substrate in neurons 2	Protein kinase C and casein kinase substrate in neurons 2 OS=Canis lupus familiaris OX=9615 PE=3 SV=1	51	ADPSLNPEQLK	G2B	2
0.269	816	913.452	913.472	0.0195	A0A8C0NW49	CANLF	Endonuclease domain containing 1	Endonuclease domain containing 1 OS=Canis lupus familiaris OX=9615 PE=4 SV=1	94	FATLYSGR	G2A	2
0.269	141	885.454	885.496	0.0414	A0A8C0QPV2	CANLF	RRM domain-containing protein	RRM domain-containing protein OS=Canis lupus familiaris OX=9615 PE=4 SV=1	628	AVVIVDDR	G2A	2
0.273	1017	1654.82	1654.79	0.0312	A0A8C0NHA1	CANLF	FMR1 autosomal homolog 2	FMR1 autosomal homolog 2 OS=Canis lupus familiaris OX=9615 PE=3 SV=1	69	SYLEFSEDSVQVPR	G3A	3
0.274	414	2216	2216.2	0.2016	A0A8C0NEF6	CANLF	Coiled-coil domain-containing protein 22	Coiled-coil domain-containing protein 22 OS=Canis lupus familiaris OX=9615 GN=CCDC22 PE=3 SV=1	228	EFQASPLLLPAPTQVPQPAGR	G3A	3
0.275	63	772.458	772.447	0.0109	A0A6S4Q341	CANLF	DLA class I alpha chain	DLA class I alpha chain OS=Canis lupus familiaris OX=9615 GN=DLA88 PE=3 SV=1	1204	VGLDTLR	G3B	3
0.275	6	1705.82	1705.82	0.0043	A0A8P0TN04	CANLF	PDZ domain-containing protein	PDZ domain-containing protein OS=Canis lupus familiaris OX=9615 GN=AHNAK PE=4 SV=1	8719	VDIDTPDVDIHGPEGK	G1B	1
0.275	594	1044.65	1044.62	0.0249	A0A8C0NQI1	CANLF	Annexin OS=Canis lupus familiaris	Annexin OS=Canis lupus familiaris OX=9615 PE=3 SV=1	148	TLISILTER	G2B	2
0.275	698	1493.63	1493.67	0.0415	A0A8C0P568	CANLF	Cytosolic fatty-acid binding proteins domain-containing protein	Cytosolic fatty-acid binding proteins domain-containing protein OS=Canis lupus familiaris OX=9615 PE=3 SV=1	119	LGQEFDEVTADDR	G1A	1
0.276	420	1069.65	1069.63	0.0179	A0A8C0LYM6	CANLF	Actin-related protein 2/3 complex subunit 5	Actin-related protein 2/3 complex subunit 5 OS=Canis lupus familiaris OX=9615 GN=ARPC5 PE=3 SV=1	226	ALAAGGVGSIVR	G2B	2
0.279	378	1197.64	1197.64	0.0009	A0A8C0T1U3	CANLF	60S ribosomal protein L13a	60S ribosomal protein L13a OS=Canis lupus familiaris OX=9615 GN=RPL13A PE=3 SV=1	249	AEGQVLVLDGR	G2A	2
0.286	136	2088	2088.01	0.0068	A0A8C0SIZ0	CANLF	F-actin-capping protein subunit alpha	F-actin-capping protein subunit alpha OS=Canis lupus familiaris OX=9615 GN=CAPZA1 PE=3 SV=1	650	FITHAPPGEFNEVFNDVR	G3A	3
0.288	1535	866.454	866.537	0.0826	A0A8C0NAN9	CANLF	Integrin subunit alpha 6	Integrin subunit alpha 6 OS=Canis lupus familiaris OX=9615 PE=3 SV=1	34	AVALPLQR	G2A	2
0.289	405	1080.45	1080.51	0.0611	A0A8C0PF16	CANLF	Transferrin-like domain-containing protein	Transferrin-like domain-containing protein OS=Canis lupus familiaris OX=9615 GN=LTF PE=3 SV=1	233	YFGYTGAFR	G3B	3
0.289	141	1635.82	1635.82	0.0033	A0A8C0NGA6	CANLF	Non-POU domain containing octamer binding	Non-POU domain containing octamer binding OS=Canis lupus familiaris OX=9615 GN=NONO PE=4 SV=1	557	RQQEGFKGTFPDAR	G3A	3
0.289	114	2056.01	2056.08	0.0709	A0A8C0NXB1	CANLF	KH-type splicing regulatory protein	KH-type splicing regulatory protein OS=Canis lupus familiaris OX=9615 PE=4 SV=1	817	LASQGDSISSQLGPIHPPPR	G2A	2
0.29	63	830.456	830.453	0.003	A0A6S4Q314	CANLF	DLA class I alpha chain	DLA class I alpha chain OS=Canis lupus familiaris OX=9615 GN=DLA88 PE=2 SV=1	1397	VDLDTLR	G2B	2
0.29	955	1222.64	1222.63	0.0114	A0A8C0NJU0	CANLF	Pre-mRNA 3~-end-processing factor FIP1	Pre-mRNA 3~-end-processing factor FIP1 OS=Canis lupus familiaris OX=9615 PE=3 SV=1	75	AEFTSPPSLFK	G3B	3
0.291	43	1832.81	1832.78	0.0324	A0A8C0M536	CANLF	Heat shock protein 90 alpha family class A member 1	Heat shock protein 90 alpha family class A member 1 OS=Canis lupus familiaris OX=9615 PE=3 SV=1	1726	NPDDITNEEYGEFYK	G2A	2
0.293	222	2217	2217.02	0.0236	A0A8C0MPT3	CANLF	F-actin-capping protein subunit beta	F-actin-capping protein subunit beta OS=Canis lupus familiaris OX=9615 GN=CAPZB PE=3 SV=1	414	SPWSNKYDPPLEDGAMPSAR	G2A	2
0.294	5	868.454	868.473	0.0187	MYH2	CANLF	Myosin-2	Myosin-2 OS=Canis lupus familiaris OX=9615 GN=MYH2 PE=3 SV=1	11617	ILYADFK	G1B	1
0.295	1446	2133	2133.11	0.105	A0A8C0NB32	CANLF	ATP-dependent RNA helicase	ATP-dependent RNA helicase OS=Canis lupus familiaris OX=9615 GN=DDX1 PE=3 SV=1	39	EAQTSFLHLGYLPNQLFR	G2A	2
0.296	36	836.456	836.391	0.0652	A0A8C0TID4	CANLF	Heterogeneous nuclear ribonucleoprotein M	Heterogeneous nuclear ribonucleoprotein M OS=Canis lupus familiaris OX=9615 GN=HNRNPM PE=4 SV=1	2609	MGLVMDR	G1B	1
0.296	150	1107.64	1107.6	0.0436	A0A8C0P762	CANLF	Anaphylatoxin-like domain-containing protein	Anaphylatoxin-like domain-containing protein OS=Canis lupus familiaris OX=9615 PE=4 SV=1	602	YVLPNFEVK	G3B	3
0.296	51	2040.01	2039.98	0.0227	A0A8C0NPN5	CANLF	14-3-3 domain-containing protein	14-3-3 domain-containing protein OS=Canis lupus familiaris OX=9615 PE=3 SV=1	1678	GIVDQSQQAYQEAFEISK	G3B	3
0.299	51	2131	2130.99	0.0064	A0A8C0NPN5	CANLF	14-3-3 domain-containing protein	14-3-3 domain-containing protein OS=Canis lupus familiaris OX=9615 PE=3 SV=1	1678	TAFDEAIAELDTLSEESYK	G2B	2
0.3	193	818.456	818.436	0.0201	A0A8C0MGY1	CANLF	T-complex protein 1 subunit beta	T-complex protein 1 subunit beta OS=Canis lupus familiaris OX=9615 GN=CCT2 PE=3 SV=1	469	VLVDMSR	G3A	3
0.3	52	867.454	867.478	0.0234	A0A8C0NK63	CANLF	Pyruvate kinase	Pyruvate kinase OS=Canis lupus familiaris OX=9615 GN=PARP6 PE=3 SV=1	1637	MQHLIAR	G1A	1
0.989	19	1148.64	1148.62	0.0173	A0A8C0PLP5	CANLF	Plectin	Plectin OS=Canis lupus familiaris OX=9615 GN=PLEC PE=4 SV=1	4148	AGLVGPELHEK	G3A	3
0.986	363	1149.64	1149.65	0.0127	A0A8C0NQ71	CANLF	WAS/WASL interacting protein family member 1	WAS/WASL interacting protein family member 1 OS=Canis lupus familiaris OX=9615 PE=4 SV=1	259	ALPATPQLPSR	G1A	1
0.978	408	1163.64	1163.59	0.0473	A0A8C0MPI8	CANLF	SWI/SNF related, matrix associated, actin dependent regulator of chromatin, subfamily a, member 5	SWI/SNF related, matrix associated, actin dependent regulator of chromatin, subfamily a, member 5 OS=Canis lupus familiaris OX=9615 GN=SMARCA5 PE=3 SV=1	232	QNLLSVGDYR	G2A	2
0.978	1635	1138.64	1138.62	0.0266	A0A8C0M3C8	CANLF	Aminopeptidase	Aminopeptidase OS=Canis lupus familiaris OX=9615 PE=3 SV=1	30	LNLGTVGFYR	G2A	2
0.976	1296	1164.64	1164.62	0.0255	A0A8C0PDB7	CANLF	Lysosomal associated membrane protein 1	Lysosomal associated membrane protein 1 OS=Canis lupus familiaris OX=9615 GN=LAMP1 PE=3 SV=1	46	ALQATIGNSYK	G1A	1
0.974	6	1141.64	1141.64	0.0039	A0A8P0TN04	CANLF	PDZ domain-containing protein	PDZ domain-containing protein OS=Canis lupus familiaris OX=9615 GN=AHNAK PE=4 SV=1	8719	VKGDVDVSVPK	G2A	2
0.959	128	1139.64	1139.65	0.0023	A0A8C0PP72	CANLF	Ribosomal protein L18	Ribosomal protein L18 OS=Canis lupus familiaris OX=9615 GN=RPL18 PE=3 SV=1	724	TNRPPLSLSR	G1A	1
0.958	7	1154.64	1154.66	0.0179	A0A8C0MNE2	CANLF	Myosin-9	Myosin-9 OS=Canis lupus familiaris OX=9615 GN=MYH9 PE=3 SV=1	8891	RGDLPFVVPR	G1B	1
0.957	26	1150.64	1150.59	0.0513	A0A8C0NY99	CANLF	Keratin, type II cytoskeletal 1	Keratin, type II cytoskeletal 1 OS=Canis lupus familiaris OX=9615 GN=KRT1 PE=3 SV=1	2037	YEELQITAGK	G2A	2
0.954	111	1215.64	1215.63	0.0108	A0A8C0PLW8	CANLF	60S ribosomal protein L7a	60S ribosomal protein L7a OS=Canis lupus familiaris OX=9615 GN=RPL7A PE=3 SV=1	835	NFGIGQDIQPK	G3A	3
0.946	471	1128.44	1128.51	0.0691	A0A8C0RFT9	CANLF	Carbonic anhydrase	Carbonic anhydrase OS=Canis lupus familiaris OX=9615 GN=CA3 PE=3 SV=1	196	VVFDDTYDR	G1A	1
0.944	283	883.454	883.48	0.0255	A0A8C0MXC8	CANLF	Myosin binding protein C, slow type	Myosin binding protein C, slow type OS=Canis lupus familiaris OX=9615 GN=MYBPC1 PE=4 SV=1	344	VAIVDDPR	G1B	1
0.937	831	1192.64	1192.64	0.0001	A0A8C0P1Y0	CANLF	Dihydrolipoyl dehydrogenase	Dihydrolipoyl dehydrogenase OS=Canis lupus familiaris OX=9615 GN=DLD PE=3 SV=1	91	VGKFPFAANSR	G3A	3
0.936	36	1116.44	1116.48	0.0408	A0A8C0TID4	CANLF	Heterogeneous nuclear ribonucleoprotein M	Heterogeneous nuclear ribonucleoprotein M OS=Canis lupus familiaris OX=9615 GN=HNRNPM PE=4 SV=1	2609	MGAGLGHGMDR	G2B	2
0.936	1484	1127.64	1127.64	0.0069	A0A8C0M4B9	CANLF	Acetyl-CoA carboxylase kinase	Acetyl-CoA carboxylase kinase OS=Canis lupus familiaris OX=9615 PE=3 SV=1	36	VPFLVAETPR	G2A	2
0.935	30	1216.64	1216.63	0.0115	A0A8C0MIT4	CANLF	78 kDa glucose-regulated protein	78 kDa glucose-regulated protein OS=Canis lupus familiaris OX=9615 PE=3 SV=1	3033	DAGTIAGLNVMR	G3A	3
0.935	1483	1126.64	1126.64	0.0041	A0A8C0MIJ2	CANLF	EF-hand domain-containing protein	EF-hand domain-containing protein OS=Canis lupus familiaris OX=9615 PE=4 SV=1	36	LSPQAVNSIAK	G2A	2
0.93	84	1165.64	1165.64	0.0028	A0A8C0SV20	CANLF	Lumican	Lumican OS=Canis lupus familiaris OX=9615 GN=LUM PE=4 SV=1	1014	RFNGLQYLR	G3B	3
0.926	7	998.449	998.559	0.1094	A0A8C0MNE2	CANLF	Myosin-9	Myosin-9 OS=Canis lupus familiaris OX=9615 GN=MYH9 PE=3 SV=1	8891	GDLPFVVPR	G3A	3
0.925	301	1204.64	1204.63	0.0123	A0A8C0NR61	CANLF	RNA-binding protein 14	RNA-binding protein 14 OS=Canis lupus familiaris OX=9615 GN=LOC610648 PE=4 SV=1	324	AQPSASLGVGYR	G1B	1
0.918	956	1214.64	1214.63	0.009	A0A8C0RH82	CANLF	Tyrosine-protein kinase	Tyrosine-protein kinase OS=Canis lupus familiaris OX=9615 GN=CSK PE=3 SV=1	75	LSLMPWFHGK	G2B	2
0.914	63	1241.64	1241.65	0.0111	A0A6S4Q8B0	CANLF	DLA class I alpha chain	DLA class I alpha chain OS=Canis lupus familiaris OX=9615 GN=DLA88 PE=3 SV=1	1228	TFKETAQVYR	G2A	2
0.912	2	997.449	997.482	0.033	ACTB	CANLF	Actin, cytoplasmic 1	Actin, cytoplasmic 1 OS=Canis lupus familiaris OX=9615 GN=ACTB PE=2 SV=3	15866	DLTDYLMK	G3A	3
0.911	5	1123.64	1123.61	0.0308	A0A8C0M7Z7	CANLF	Myosin-1	Myosin-1 OS=Canis lupus familiaris OX=9615 GN=MYH1 PE=3 SV=1	10528	SALAHALQSAR	G3A	3
0.908	580	1142.44	1142.59	0.1422	A0A8C0Z3I7	CANLF	Ribosomal protein L37a	Ribosomal protein L37a OS=Canis lupus familiaris OX=9615 GN=RPL37A PE=3 SV=1	154	YGTRYGASLR	G2B	2
0.908	130	1102.44	1102.51	0.0707	A0A8C0MFH9	CANLF	Transforming growth factor beta induced	Transforming growth factor beta induced OS=Canis lupus familiaris OX=9615 PE=4 SV=1	690	YGTLFTMDR	G3A	3
0.904	1140	1278.64	1278.63	0.0089	A0A8C0NZG4	CANLF	Adducin 3	Adducin 3 OS=Canis lupus familiaris OX=9615 GN=ADD3 PE=3 SV=1	57	VGEIEFEGLMR	G2A	2
0.903	131	1217.64	1217.64	0.0045	A0A8C0NAG1	CANLF	ELAV-like protein	ELAV-like protein OS=Canis lupus familiaris OX=9615 PE=3 SV=1	678	DANLYISGLPR	G2B	2
0.899	1369	1243.64	1243.63	0.0125	A0A8C0MDE2	CANLF	Coiled-coil domain-containing protein 43	Coiled-coil domain-containing protein 43 OS=Canis lupus familiaris OX=9615 PE=3 SV=1	42	NTNVEDVLNAR	G2B	2
0.894	1395	1375.63	1375.7	0.0687	A0A8C0N1F3	CANLF	Pleckstrin homology domain containing A2	Pleckstrin homology domain containing A2 OS=Canis lupus familiaris OX=9615 GN=PLEKHA2 PE=4 SV=1	41	LGESSTSGVLPSSR	G2B	2
0.892	854	1242.64	1242.65	0.0108	A0A8C0SSF9	CANLF	Ly1 antibody reactive	Ly1 antibody reactive OS=Canis lupus familiaris OX=9615 GN=LYAR PE=4 SV=1	88	VLAVGTNDPTEK	G2A	2
0.882	171	1231.64	1231.64	0.0056	A0A8C0Q0M7	CANLF	EF-hand domain family member D2	EF-hand domain family member D2 OS=Canis lupus familiaris OX=9615 PE=4 SV=1	540	ATDELASKLSR	G1A	1
0.872	1523	1124.64	1124.65	0.0023	A0A8C0M0I8	CANLF	Prefoldin subunit 1	Prefoldin subunit 1 OS=Canis lupus familiaris OX=9615 PE=3 SV=1	35	AAPVDLELKK	G2B	2
0.869	129	1053.45	1053.53	0.0818	A0A8C0MWQ8	CANLF	Hematopoietic cell-specific Lyn substrate 1	Hematopoietic cell-specific Lyn substrate 1 OS=Canis lupus familiaris OX=9615 PE=4 SV=1	710	GFGGQYGIQK	G2B	2
0.868	1652	1101.64	1101.59	0.0567	A0A8C0P3G6	CANLF	Rho GTPase activating protein 17	Rho GTPase activating protein 17 OS=Canis lupus familiaris OX=9615 PE=4 SV=1	29	LVLDWDSVR	G3A	3
0.866	716	1100.65	1100.64	0.0032	A0A8C0PIK7	CANLF	GTPase, IMAP family member 4	GTPase, IMAP family member 4 OS=Canis lupus familiaris OX=9615 GN=GIMAP4 PE=3 SV=1	116	MQLLTLVQR	G3A	3
0.864	1463	806.457	806.432	0.0248	A0A8C0NYT0	CANLF	Stromal interaction molecule 1	Stromal interaction molecule 1 OS=Canis lupus familiaris OX=9615 GN=STIM1 PE=4 SV=1	38	LSFDAVR	G2B	2
0.863	236	873.454	873.495	0.0408	A0A8C0MY55	CANLF	Wiskott-Aldrich syndrome protein family member	Wiskott-Aldrich syndrome protein family member OS=Canis lupus familiaris OX=9615 GN=WASF2 PE=3 SV=1	400	SDLLSAIR	G2B	2
0.858	572	845.255	845.478	0.2231	A0A8C0QGH7	CANLF	Fatty acid synthase	Fatty acid synthase OS=Canis lupus familiaris OX=9615 PE=4 SV=1	157	AGLYGLPR	G1A	1
0.857	1224	1155.44	1155.56	0.121	A0A8C0MTB6	CANLF	Ubiquitin carboxyl-terminal hydrolase	Ubiquitin carboxyl-terminal hydrolase OS=Canis lupus familiaris OX=9615 GN=UCHL3 PE=3 SV=1	50	YLENYDAIR	G2B	2
0.856	3	844.255	844.505	0.2499	A0A8C0TVM6	CANLF	Histone H2B OS=Canis lupus familiaris	Histone H2B OS=Canis lupus familiaris OX=9615 PE=3 SV=1	15338	SGVSLAALK	G3A	3
0.856	10	1354.63	1354.66	0.0223	A0A8C0MNX2	CANLF	Tubulin beta chain	Tubulin beta chain OS=Canis lupus familiaris OX=9615 GN=LOC478701 PE=3 SV=1	5037	INVYYNEAAGNK	G2A	2
0.854	747	1213.64	1213.63	0.0098	A0A8C0PJI4	CANLF	Acetyl-coenzyme A synthetase	Acetyl-coenzyme A synthetase OS=Canis lupus familiaris OX=9615 PE=3 SV=1	108	EPAAFWGPLAR	G2B	2
0.853	1657	1075.45	1075.47	0.0194	A0A8C0M0M8	CANLF	LSM14A mRNA processing body assembly factor	LSM14A mRNA processing body assembly factor OS=Canis lupus familiaris OX=9615 GN=LSM14A PE=3 SV=1	29	EFADFEYR	G2B	2
0.852	1261	1219.64	1219.64	0.0043	A0A8C0NRL7	CANLF	LIM domain containing preferred translocation partner in lipoma	LIM domain containing preferred translocation partner in lipoma OS=Canis lupus familiaris OX=9615 GN=LPP PE=4 SV=1	47	STGEPLGHVPAR	G3B	3
0.844	250	987.449	987.489	0.0399	A0A8C0T1Z7	CANLF	ATPase H+ transporting V1 subunit E1	ATPase H+ transporting V1 subunit E1 OS=Canis lupus familiaris OX=9615 GN=ATP6V1E1 PE=3 SV=1	385	ALSDADVQK	G2A	2
0.842	7	1115.44	1115.57	0.129	A0A8C0MNE2	CANLF	Myosin-9	Myosin-9 OS=Canis lupus familiaris OX=9615 GN=MYH9 PE=3 SV=1	8891	DLGEELEALK	G3B	3
0.838	19	999.449	999.539	0.0895	A0A8C0PLP5	CANLF	Plectin	Plectin OS=Canis lupus familiaris OX=9615 GN=PLEC PE=4 SV=1	4148	QAEAELALR	G2B	2
0.837	1494	1355.63	1355.66	0.0223	A0A8C0NGE2	CANLF	DEK proto-oncogene	DEK proto-oncogene OS=Canis lupus familiaris OX=9615 PE=4 SV=1	36	NVGQFSGFPFEK	G2B	2
0.836	66	1193.64	1193.63	0.0112	A0A8C0M6L4	CANLF	Cytosol aminopeptidase	Cytosol aminopeptidase OS=Canis lupus familiaris OX=9615 GN=LAP3 PE=3 SV=1	1309	GITFDSGGISIK	G2B	2
0.827	191	1220.64	1220.63	0.0047	A0A8C0SBE5	CANLF	40S ribosomal protein S4	40S ribosomal protein S4 OS=Canis lupus familiaris OX=9615 GN=RPS4X PE=3 SV=1	475	HPGSFDVVHVK	G2A	2
0.824	1141	1038.45	1038.49	0.0382	A0A8C0PFQ2	CANLF	V-type proton ATPase subunit F	V-type proton ATPase subunit F OS=Canis lupus familiaris OX=9615 GN=ATP6V1F PE=3 SV=1	57	GMFTAEDLR	G2B	2
0.823	433	919.452	919.447	0.0052	A0A8C0N0Z2	CANLF	Receptor for activated C kinase 1	Receptor for activated C kinase 1 OS=Canis lupus familiaris OX=9615 GN=RACK1 PE=3 SV=1	219	TEQMTLR	G2A	2
0.822	134	1103.44	1103.53	0.0879	A0A8C0MHZ2	CANLF	Elastin microfibril interfacer 1	Elastin microfibril interfacer 1 OS=Canis lupus familiaris OX=9615 GN=EMILIN1 PE=4 SV=1	659	SEPGTVPFDR	G2A	2
0.82	19	1077.45	1077.51	0.0668	A0A8C0PLP5	CANLF	Plectin	Plectin OS=Canis lupus familiaris OX=9615 GN=PLEC PE=4 SV=1	4148	LAEDEAFQR	G2B	2
0.818	32	1117.44	1117.55	0.1091	A0A8C0MLN7	CANLF	Histone H2A	Histone H2A OS=Canis lupus familiaris OX=9615 GN=H2AFV PE=3 SV=1	593	GDEELDSLIK	G3B	3
0.815	896	1233.64	1233.64	0.0011	A0A8C0M7N9	CANLF	Rad60/SUMO-like domain-containing protein	Rad60/SUMO-like domain-containing protein OS=Canis lupus familiaris OX=9615 GN=SUMO2 PE=4 SV=1	82	VAGQDGSVVQFK	G2A	2
0.811	42	1166.64	1166.65	0.0034	A0A8C0S817	CANLF	IF rod domain-containing protein	IF rod domain-containing protein OS=Canis lupus familiaris OX=9615 GN=KRT13 PE=3 SV=1	1223	VVSTHEQVLR	G3A	3
0.806	566	1280.64	1280.66	0.0223	A0A8C0NPG3	CANLF	Actin related protein 3	Actin related protein 3 OS=Canis lupus familiaris OX=9615 PE=3 SV=1	159	NIVLSGGSTMFR	G2A	2
0.803	39	1353.63	1353.68	0.0483	A0A8C0NPX9	CANLF	Protein disulfide-isomerase	Protein disulfide-isomerase OS=Canis lupus familiaris OX=9615 GN=PDIA3 PE=3 SV=1	2354	EATNPPVIQEEK	G2B	2
0.799	1420	1182.64	1182.61	0.031	A0A8C0RI14	CANLF	Transcription factor A, mitochondrial	Transcription factor A, mitochondrial OS=Canis lupus familiaris OX=9615 GN=TFAM PE=4 SV=1	40	SAYNIFIAER	G2A	2
0.797	80	1208.44	1208.57	0.1288	A0A8C0NCH8	CANLF	Matrin 3	Matrin 3 OS=Canis lupus familiaris OX=9615 GN=MATR3 PE=4 SV=1	1060	TEEGPTLSYGR	G2A	2
0.796	82	1010.45	1010.54	0.0891	A0A8C0NKZ2	CANLF	RNA helicase	RNA helicase OS=Canis lupus familiaris OX=9615 PE=3 SV=1	1031	LMQLVDHR	G2B	2
0.789	19	863.454	863.454	0.0004	A0A8C0PLP5	CANLF	Plectin	Plectin OS=Canis lupus familiaris OX=9615 GN=PLEC PE=4 SV=1	4148	FAEQTLR	G3A	3
0.788	295	758.259	758.421	0.162	A0A8C0NFF4	CANLF	60S ribosomal protein L21	60S ribosomal protein L21 OS=Canis lupus familiaris OX=9615 PE=3 SV=1	326	GDIVDIK	G2A	2
0.785	297	858.455	858.487	0.032	A0A8C0NIR4	CANLF	Myosin IF	Myosin IF OS=Canis lupus familiaris OX=9615 PE=3 SV=1	325	GSGDLAVLK	G2B	2
0.781	13	988.449	988.574	0.1245	A0A8C0TQ44	CANLF	Histone H4	Histone H4 OS=Canis lupus familiaris OX=9615 GN=LOC483167 PE=3 SV=1	6181	VFLENVIR	G1A	1
0.779	342	1183.64	1183.66	0.0234	A0A8C0LZY0	CANLF	40S ribosomal protein S17	40S ribosomal protein S17 OS=Canis lupus familiaris OX=9615 PE=3 SV=1	273	VIIEKYYTR	G1B	1
0.777	94	760.259	760.42	0.1607	A0A8C0NCX3	CANLF	Dihydropyrimidine dehydrogenase [NADP(+)]	Dihydropyrimidine dehydrogenase [NADP(+)] OS=Canis lupus familiaris OX=9615 PE=3 SV=1	937	IAELMGK	G3A	3
0.775	1008	1114.64	1114.63	0.0158	A0A8C0MQK8	CANLF	U2A~/phosphoprotein 32 family A C-terminal domain-containing protein	U2A~/phosphoprotein 32 family A C-terminal domain-containing protein OS=Canis lupus familiaris OX=9615 PE=3 SV=1	69	ISGGLEVLAEK	G2B	2
0.775	508	1109.64	1109.64	0.0042	A0A8C0PAY4	CANLF	Dyskerin pseudouridine synthase 1	Dyskerin pseudouridine synthase 1 OS=Canis lupus familiaris OX=9615 GN=DKC1 PE=3 SV=1	181	ADAEVLILPK	G2A	2
0.771	141	1227.64	1227.64	0.003	A0A8C0NGA6	CANLF	Non-POU domain containing octamer binding	Non-POU domain containing octamer binding OS=Canis lupus familiaris OX=9615 GN=NONO PE=4 SV=1	557	AAPGAEFAPNKR	G1A	1
0.768	141	1098.65	1098.62	0.0275	A0A8C0QPV2	CANLF	RRM domain-containing protein	RRM domain-containing protein OS=Canis lupus familiaris OX=9615 PE=4 SV=1	628	AVVIVDDRGR	G1B	1
0.757	390	782.458	782.504	0.046	A0A8C0PAL6	CANLF	RRM domain-containing protein	RRM domain-containing protein OS=Canis lupus familiaris OX=9615 GN=RALY PE=3 SV=1	242	VTVPLVR	G3A	3
0.741	42	1064.45	1064.52	0.0704	A0A8C0PK81	CANLF	IF rod domain-containing protein	IF rod domain-containing protein OS=Canis lupus familiaris OX=9615 GN=KRT18 PE=3 SV=1	115	AQYDELAQK	G1A	1
0.74	60	1050.45	1050.52	0.0727	A0A8C0NHS9	CANLF	Transitional endoplasmic reticulum ATPase	Transitional endoplasmic reticulum ATPase OS=Canis lupus familiaris OX=9615 GN=VCP PE=3 SV=1	1504	MDELQLFR	G3A	3
0.737	47	1191.64	1191.64	0.0028	A0A8C0NRA6	CANLF	Ribosomal protein L24	Ribosomal protein L24 OS=Canis lupus familiaris OX=9615 GN=RPL24 PE=3 SV=1	1823	QINWTVLYR	G2A	2
0.736	660	941.451	941.428	0.0236	A0A8C0NYY6	CANLF	Sad1 and UNC84 domain containing 2	Sad1 and UNC84 domain containing 2 OS=Canis lupus familiaris OX=9615 PE=4 SV=1	130	ESYFGSPR	G2A	2
0.735	141	832.456	832.441	0.0157	A0A8C0NGA6	CANLF	Non-POU domain containing octamer binding	Non-POU domain containing octamer binding OS=Canis lupus familiaris OX=9615 GN=NONO PE=4 SV=1	557	ALIEMEK	G2A	2
0.734	1405	935.451	935.493	0.0418	A0A8C0LZ39	CANLF	ERCC excision repair 8, CSA ubiquitin ligase complex subunit	ERCC excision repair 8, CSA ubiquitin ligase complex subunit OS=Canis lupus familiaris OX=9615 GN=ERCC8 PE=4 SV=1	40	MLGFLSAR	G2A	2
0.733	42	1143.44	1143.49	0.0497	A0A8C0S817	CANLF	IF rod domain-containing protein	IF rod domain-containing protein OS=Canis lupus familiaris OX=9615 GN=KRT13 PE=3 SV=1	1223	DAEDWFFSK	G1A	1
0.733	161	1496.83	1496.86	0.0365	A0A8C0QBX2	CANLF	Adenosylhomocysteinase	Adenosylhomocysteinase OS=Canis lupus familiaris OX=9615 PE=3 SV=1	568	LKVPAINVNDSVTK	G2B	2
0.729	6	899.453	899.474	0.0205	A0A8P0TN04	CANLF	PDZ domain-containing protein	PDZ domain-containing protein OS=Canis lupus familiaris OX=9615 GN=AHNAK PE=4 SV=1	8719	GNLDVSAPK	G1A	1
0.728	26	1011.45	1011.5	0.0556	A0A8C0T114	CANLF	Keratin 75	Keratin 75 OS=Canis lupus familiaris OX=9615 PE=3 SV=1	977	SGFSSVSVSR	G3A	3
0.728	1587	1076.45	1076.61	0.1685	A0A8C0PUF7	CANLF	Nucleobindin 2	Nucleobindin 2 OS=Canis lupus familiaris OX=9615 PE=3 SV=1	32	LVTLDEFLK	G2B	2
0.728	838	1112.64	1112.65	0.0059	A0A8C0TE44	CANLF	Methyl-CpG-binding protein 2	Methyl-CpG-binding protein 2 OS=Canis lupus familiaris OX=9615 PE=4 SV=1	89	SVQETVLPIK	G2A	2
0.712	88	1024.45	1024.5	0.0529	A0A8C0Q5H2	CANLF	Myosin light chain 6	Myosin light chain 6 OS=Canis lupus familiaris OX=9615 GN=MYL6 PE=4 SV=1	648	EAFQLFDR	G2B	2
0.71	580	1048.65	1048.61	0.0399	A0A8C0Z3I7	CANLF	Ribosomal protein L37a	Ribosomal protein L37a OS=Canis lupus familiaris OX=9615 GN=RPL37A PE=3 SV=1	154	VGIVGKYGTR	G1B	1
0.708	54	1054.45	1054.54	0.0897	A0A8C0MES4	CANLF	Peptidyl-prolyl cis-trans isomerase	Peptidyl-prolyl cis-trans isomerase OS=Canis lupus familiaris OX=9615 PE=3 SV=1	1607	VSFELFADK	G3A	3
0.707	8	879.454	879.438	0.0167	A0A8C0NV01	CANLF	Albumin	Albumin OS=Canis lupus familiaris OX=9615 GN=ALB PE=4 SV=1	7315	ADFAEISK	G3B	3
0.705	275	1290.64	1290.64	0.0037	A0A8C0LYF2	CANLF	Caveolae associated protein 1	Caveolae associated protein 1 OS=Canis lupus familiaris OX=9615 PE=3 SV=1	351	SFTPDHVVYAR	G2A	2
0.704	92	1167.64	1167.63	0.0136	A0A8C0PAU8	CANLF	Lamin B1	Lamin B1 OS=Canis lupus familiaris OX=9615 PE=3 SV=1	938	ASAPATPLSPTR	G2A	2
0.704	1300	757.259	757.411	0.152	A0A8C0PZN0	CANLF	NADH dehydrogenase [ubiquinone] 1 alpha subcomplex subunit 2	NADH dehydrogenase [ubiquinone] 1 alpha subcomplex subunit 2 OS=Canis lupus familiaris OX=9615 GN=NDUFA2 PE=3 SV=1	46	AGAAASLR	G1A	1
0.702	1083	1194.64	1194.64	0.0005	A0A8C0P334	CANLF	non-specific serine/threonine protein kinase	non-specific serine/threonine protein kinase OS=Canis lupus familiaris OX=9615 GN=RPS6KA3 PE=3 SV=1	63	NQSPVLEPVGR	G2A	2
0.7	385	974.45	974.524	0.0733	A0A8C0MPB4	CANLF	Dynactin subunit 2	Dynactin subunit 2 OS=Canis lupus familiaris OX=9615 GN=DCTN2 PE=3 SV=1	244	YADLPGIAR	G2A	2
