# Supplementary material for: Immuno-oncologic profiling by stage-dependent transcriptome and proteome analyses of spontaneously regressing canine cutaneous histiocytoma
Source: PeerJ. 2024 Nov 26;12:e18444. doi: 10.7717/peerj.18444 (PMC11606323; doi:10.7717/peerj.18444)
Supplement: Supplemental Information 7 [file peerj-12-18444-s007.xlsx]

## Sheet: Overview
Overview
		2a vs 1			3 vs 2b
		up	down	total	up	down	total
DEG (FC 1)	manuscript	191	58	249	7	9	16
gProfiler		26	16	42	ns	ns	ns
DEG (FC 0.5)	additional anlysis for review	510	254	764	49	37	86
gProfiler		73	5	83	1	ns	1
Geneontology/ PATHER		216	8	188	ns	ns	ns
		ns:	no significant results
Legent for pathway lists:	does not fit with the tissue
	might be immuno-oncologically relevant, but also appear with our original threshholds

## Sheet: DEG log2FC 0.5
p adj ≤ 0.05, log2(FC) ≤ -0.5 or ≥ 0.5
2a vs 1				3 vs 2b
Gene	log2(FC)	adjusted p- value		Gene	log2(FC)	adjusted p- value
LOC111098258	7.77351	0.000110575		ANXA8L1	2.17922	0.0134746
LOC607624	5.4725	0.00245821		PTPRF	1.46278	0.0110608
TFPI	4.50101	0.00135217		DOP1B	1.34312	0.00017539
CCL17	4.03025	0.0189335		NUGGC	1.122	0.0417912
LOC119869021	3.71556	0.00998108		TINAGL1	1.00355	0.0335109
LOC119869063	3.13806	0.00937445		ZNF346	0.929361	0.00831339
LOC119869020	3.01449	0.0237048		SHC1	0.905123	3.98598e-05
NOM1	2.8753	4.75263e-05		ABHD17C	0.850213	0.00831339
LOC607582	2.72475	0.0218403		NDUFAF8	0.848091	0.000151536
POLN	2.67377	0.0247395		G6PD	0.845321	7.69016e-05
ST7L	2.66309	0.00235119		GPX4	0.836692	0.0211139
THSD7A	2.53837	0.00208452		E2F1	0.82569	0.0371951
LOC119874749	2.46595	0.0251324		HSD17B7	0.821861	0.0278299
LOC119864069	2.44727	0.0206581		HSPB1	0.821292	0.0356451
LOC100686502	2.41398	0.000619986		LOC100684252	0.793609	0.00425191
PPP1R27	2.33745	0.034754		GBGT1	0.766646	0.0087938
LOC119869019	2.29265	0.0371974		TOP3B	0.756659	0.00276543
MAOA	2.21989	0.0448817		KAT8	0.72237	0.00831339
CPE	2.14475	0.0285036		CDC42EP4	0.695312	0.0164447
LOC102156332	2.1329	0.0052236		CNPPD1	0.673501	0.0171983
LOC111098018	2.12189	0.0115423		RAD23A	0.672319	4.09652e-07
LOC119878265	2.09228	0.00496316		CHCHD2	0.663769	6.14264e-09
NME1	2.07607	0.00961508		JMJD8	0.662036	0.000341208
LOC489252	2.02845	0.000257571		TACC3	0.649958	0.00245009
LOC119866970	2.01735	0.0262987		H1-0	0.638754	0.0498526
LYZ	1.9951	0.0449271		UBL5	0.621021	0.00425191
LOC119868024	1.98652	0.0177439		C18H11orf68	0.616264	0.0251359
CCDC171	1.93615	0.017929		LARP1	0.608711	7.94697e-11
PLEC	1.93414	3.50487e-06		SCARB1	0.599596	0.00217018
DLA-79	1.9017	0.00822943		GLOD4	0.586908	0.00100998
BRD8	1.87245	0.0112893		LOC607300	0.572558	0.0229627
LOC608573	1.85669	0.00161749		FMNL1	0.569985	0.0288656
NR3C1	1.84823	0.00179154		PCIF1	0.561684	0.0342505
TCF7L2	1.83249	0.000431274		LOC607207	0.556552	0.000224194
LMNB1	1.83227	0.00400115		C1QBP	0.55364	0.00831339
SCX	1.82627	0.0376666		TADA2A	0.549164	0.024802
CASP12	1.80747	0.0245303		FAF1	0.540514	0.044157
LOC119878795	1.77522	0.00685026		BCAP31	0.539469	7.07432e-05
EDEM3	1.76817	0.0274653		CFL1	0.53551	0.000195749
RAB1A	1.74075	0.00517761		PSMD3	0.523343	0.0052641
PLCE1	1.73365	0.013696		ERG28	0.522164	0.00897543
UBN2	1.72608	8.62865e-05		CCNY	0.517499	0.00409833
LOC102153227	1.71015	0.00120485		CDK2AP2	0.513447	0.0164447
SPECC1L	1.69924	0.00440547		DCTN3	0.511965	0.000558962
LOC111097402	1.69309	0.0367149		RRNAD1	0.507021	0.00863808
LRRC71	1.69221	0.0387693		MCRS1	0.50529	0.0243294
LOC102151760	1.68994	0.0468506		OS9	0.504242	0.0052641
TNFRSF11A	1.68245	0.00683043		NDUFS2	0.503702	0.0335109
IQGAP1	1.65608	3.50487e-06		GPS1	0.500639	0.00831339
SYCP2	1.61842	0.00164345		DOCK11	-0.504609	0.00730784
LOC607470	1.61532	7.85572e-06		ZNF292	-0.510439	0.0419359
ARID5B	1.61008	7.85572e-06		ZFC3H1	-0.51783	0.0180321
CXCL10	1.59888	0.0172551		ILF2	-0.554774	0.0413702
UTP25	1.58653	0.0395967		TET3	-0.577938	0.0176832
SHISAL1	1.58449	0.00306411		USF3	-0.602214	0.0243294
LOC119871388	1.57621	0.0140748		PNRC1	-0.613147	0.0360284
LOC119874670	1.57301	0.0315043		MFSD14B	-0.637079	0.02102
GAPDH	1.57047	0.013089		MEF2C	-0.672926	0.0362665
ATP13A3	1.56155	0.000891542		DENND4A	-0.691393	0.00729538
STAU2	1.56086	0.000270917		TMEM123	-0.693875	0.0373351
TNRC18	1.55213	1.79082e-05		SIKE1	-0.711269	0.00388526
TNFSF10	1.54142	0.00322543		ZBTB41	-0.736611	0.0108287
ATM	1.53934	0.0110876		KDM3B	-0.748458	0.00409833
ASPM	1.53696	0.000771924		OTUD3	-0.772411	0.0243294
THEM4	1.53604	0.0188013		FAM126A	-0.830625	0.00831339
CD302	1.52515	0.00113656		RPIA	-0.913701	0.0012924
PDE9A	1.51956	0.044901		CCNH	-0.970593	0.00717012
RPS6KA5	1.51787	0.00131636		ABCA1	-1.03059	0.0398722
SERPINE1	1.51097	0.0211432		STXBP4	-1.09794	0.0211139
UTRN	1.50834	1.79082e-05		ATR	-1.10588	0.0483132
LOC119879275	1.50698	0.00179154		BIRC3	-1.1759	0.0108956
GRAMD1B	1.50387	0.00885917		CSRP2	-1.22905	0.0176535
LOC119878256	1.50314	0.00179154		LOC119877202	-1.96542	1.01787e-10
LOC119878309	1.50311	0.00179154		LOC119878310	-1.98458	7.94697e-11
LOC119878304	1.50311	0.00179154		LOC119879511	-1.98466	8.08797e-11
LOC119878211	1.50311	0.00179154		LOC119878422	-1.98601	7.94697e-11
LOC119878421	1.5031	0.00179154		LOC119878212	-1.98613	7.94697e-11
LOC119879332	1.50293	0.00179154		LOC119878299	-1.98613	7.94697e-11
LOC119878329	1.50286	0.00179154		LOC119878305	-1.98613	7.94697e-11
LOC119878346	1.50283	0.00179154		LOC119879273	-1.98632	7.94697e-11
LOC119878321	1.50283	0.00179154		LOC119878330	-1.98633	7.94697e-11
LOC119878273	1.50283	0.00179154		LOC119878294	-1.98641	7.94697e-11
LOC119879510	1.50265	0.00179154		LOC119878274	-1.98642	7.94697e-11
LOC119878298	1.50243	0.00179154		LOC119878322	-1.98656	7.94697e-11
LOC119878293	1.50101	0.00184358		LOC119878257	-1.9867	7.94697e-11
HMMR	1.49222	0.00683841		RN7SL1	-2.60879	6.51262e-06
FMN1	1.47595	0.00822943
SHTN1	1.46579	0.0123563
AKAP8	1.46531	0.00683841
TMTC3	1.45459	8.27397e-05
TGFB2	1.45423	0.00547388
CYBB	1.4509	0.0243523
LOC119876090	1.44567	0.01819
NOC3L	1.44197	0.00539755
CDC73	1.41171	0.0129714
DDX59	1.41037	0.00557589
DIAPH3	1.39367	0.014538
LOC119871705	1.39177	0.035545
LOC102156760	1.39118	0.00453458
NVL	1.37897	0.00703501
EGR2	1.37881	0.00556666
LOC612100	1.37741	0.0034599
LOC102154724	1.37426	0.0124334
STX3	1.37344	0.017929
LOC106558650	1.37096	0.000430417
CBLB	1.36849	0.0147678
LOC119870566	1.36593	0.00552077
PDIA3	1.35817	7.85572e-06
ARHGAP35	1.35325	0.00932298
LOC106557777	1.34809	0.0365786
LOC119879477	1.34463	1.61303e-05
TRAF5	1.32916	0.011577
CD38	1.32834	0.0321169
HYOU1	1.31399	0.0460065
LOC119866380	1.30919	0.0111663
LOC111090723	1.30086	0.0073669
CENPE	1.28958	0.000537532
LOC607206	1.28906	0.0110876
CENPF	1.28888	0.000791764
DDX52	1.28757	2.57107e-05
LOC119877369	1.28155	0.00120644
DLA-DRA	1.27544	0.0127809
EPB41	1.25877	0.00393292
ATAD5	1.25833	0.00123221
PRKDC	1.25558	0.00184358
EHBP1	1.2512	0.0148686
CFAP251	1.24761	0.0262991
GALNT6	1.23922	0.03203
ETV6	1.23865	8.62865e-05
MEGF8	1.22454	0.0493677
RAB8A	1.21254	0.0292821
PPAN	1.20949	0.0426426
KCNK6	1.20696	0.00812832
LOC111091725	1.19767	0.0495441
LOC119865018	1.19588	0.00808663
APBB1IP	1.19514	0.00330563
TMC8	1.19354	0.0335711
UBE2N	1.19196	0.00659951
POLD2	1.18518	0.0154099
AKAP9	1.17965	0.00015862
CIP2A	1.17677	0.000771924
CEP135	1.17397	0.00301893
MPHOSPH8	1.16389	0.00513503
UBA6	1.16082	0.01819
LOC102155141	1.15998	0.0116827
UGCG	1.1563	0.000107454
BHLHE41	1.14968	0.0114636
SPCS2	1.14079	0.0279012
ZMYM4	1.13211	0.00514199
NKTR	1.13067	0.000176476
JAK2	1.12835	0.0057316
TIMP2	1.11291	0.0156841
ACTN1	1.10982	0.00116604
USP34	1.10581	0.0201749
TRAPPC3L	1.10275	0.0243523
MTBP	1.093	0.0147012
MLLT10	1.09108	0.0277968
MIER1	1.08496	0.000183946
MITD1	1.08457	0.0183181
BTF3	1.08453	0.0312721
PUF60	1.08352	0.012014
ATRX	1.08249	0.000239285
TRAF3	1.0806	0.00389468
CENPJ	1.08051	0.00811701
CEP295	1.07953	0.000242387
BAZ1B	1.07805	5.37604e-05
ZC3HAV1	1.07781	0.00252239
CASP4	1.07393	0.0224412
KIF20B	1.07118	0.0026971
LOC111094426	1.07087	0.00881833
LOC102156243	1.06945	0.00783561
EIF5B	1.06605	3.50487e-06
TAF4B	1.06603	0.0473547
RAD54L2	1.06304	0.013917
ZFP41	1.05939	0.0352551
FTSJ3	1.05309	0.00179154
CEP290	1.05173	0.00932298
NOP14	1.05138	0.00306411
MED14	1.05071	0.0198514
LENG8	1.04891	8.12388e-05
GOLGB1	1.04575	8.12388e-05
PPIG	1.04494	5.37604e-05
TMEM150B	1.04403	0.0307301
CCDC18	1.04164	0.00932298
ZBTB1	1.04161	0.0269215
LGALS8	1.03831	0.000559651
DTX3L	1.03622	0.00729793
LOC102154192	1.03425	0.0115554
DCAF13	1.0323	0.0468506
GIGYF2	1.02928	0.000692775
LOC119877534	1.02488	0.00996067
BOD1L1	1.02353	0.000200425
CEP89	1.0227	0.0340474
TMED3	1.02225	0.0172951
LOC119878294	1.02139	0.00350244
LOC119878274	1.02105	0.00350244
LOC119878305	1.02103	0.00350244
LOC119878299	1.02103	0.00350244
LOC119878212	1.02103	0.00350244
LOC119879273	1.02092	0.00350244
LOC119878422	1.02085	0.00350244
LOC119878322	1.02024	0.00350244
LOC119878330	1.02022	0.00350244
LOC119878257	1.02008	0.00350244
LOC100856727	1.01896	0.0229267
RAD50	1.01866	0.00098796
LOC119878310	1.01856	0.00352065
LOC119877202	1.01765	0.00352065
ZFP36	1.01764	0.0021206
LOC119879511	1.01413	0.00371648
AMDHD2	1.00321	0.0201749
UPF2	0.998697	0.000618839
ZFC3H1	0.998532	3.50487e-06
LOC119865688	0.998075	0.0232776
KIF13B	0.997309	0.00167501
FAM111B	0.993843	0.0283345
RIF1	0.992391	4.67908e-05
LOC119877921	0.988713	0.0140636
SAFB2	0.980317	7.85572e-06
CASP8AP2	0.977131	0.00474212
SCAPER	0.976155	0.012014
ICAM3	0.96748	0.0105981
C2CD6	0.960352	0.037609
SMC4	0.958897	0.00123816
SKP1	0.958589	0.0262467
SPART	0.957558	0.00708851
HERC1	0.955028	0.00387681
EIF4G3	0.953387	0.00152103
LOC119873902	0.945851	0.0393797
THOC2	0.944504	0.00123221
IMP3	0.93999	0.000559651
THOC1	0.937174	0.0110876
PTEN	0.936489	0.0172951
LOC479773	0.936415	0.00683841
FAM172A	0.929322	0.00352915
LOC612587	0.925838	0.000631918
ANKRD11	0.922866	0.000771924
RRBP1	0.918792	0.000380688
BAZ2B	0.917801	0.00208452
RLF	0.915707	0.000537532
LOC119876318	0.910575	0.0446655
MLEC	0.902873	0.0116547
N4BP2L2	0.898609	0.00150035
SRFBP1	0.891884	0.0198514
LOC476397	0.890898	0.012479
PIBF1	0.883704	0.0258867
LACC1	0.875043	0.00064319
SMC6	0.871788	0.00116604
MTR	0.870329	0.0134788
INO80	0.868282	0.00131262
BRWD1	0.865318	0.0129714
ARID4B	0.863988	0.00330563
LOC119873547	0.862777	0.0498692
LOC119879300	0.85548	0.018915
CENPC	0.854208	0.00411582
LOC102155521	0.853448	0.0468506
VPS13C	0.851096	0.00123221
GNL3	0.850443	0.020837
GOLGA4	0.846308	0.00179154
ANKRD12	0.844644	1.5803e-05
PRRC2C	0.844237	4.8341e-06
TCERG1	0.843982	0.000395392
IL18RAP	0.842065	0.036512
DYNC1H1	0.840094	0.000182142
PHIP	0.834924	0.000771924
TBC1D14	0.834161	0.0148686
CCDC66	0.833594	0.0100322
ANKRD49	0.82856	0.00371151
RALBP1	0.826551	0.00124235
ACIN1	0.824226	0.00123221
CCND1	0.822815	0.0253194
LOC119870186	0.821519	0.0235964
PABPN1	0.821329	8.12388e-05
RARS1	0.821056	0.00710103
SRRM1	0.821035	0.000537532
NUCB2	0.817191	0.000584349
ARID4A	0.814904	0.00820997
YLPM1	0.814096	0.00178367
CLSPN	0.81089	0.0484616
PAOX	0.808958	0.036512
PCF11	0.808163	0.00120159
GLG1	0.807932	0.000352281
SMARCA4	0.807808	0.0034599
ADAM17	0.807047	0.0235527
LOC119877673	0.804273	0.020837
SWT1	0.804109	0.0211432
LOC102152706	0.803836	0.0110876
PHF14	0.803656	0.0329775
REST	0.801911	0.00105439
ZC3HC1	0.801274	0.0205967
DNAJC2	0.79918	0.00140762
PKN2	0.796911	0.00812832
TCEA1	0.795093	0.00683841
CCNYL1	0.795072	0.0347069
SFSWAP	0.794613	0.0147678
NOP58	0.793671	0.00265617
SYK	0.789926	0.00769449
SLC41A1	0.788458	0.0325115
MAP7D3	0.786473	0.00794806
LUC7L	0.785919	0.00123816
CRCP	0.785679	0.0391962
NSRP1	0.784609	0.00116604
LARP1B	0.784528	0.0279969
HSP90B1	0.780845	0.00937445
RBM25	0.780007	0.000771924
GTF2F1	0.776349	0.00123221
LOC119878487	0.774381	0.0488663
CEP152	0.773884	0.0308717
THRAP3	0.772378	0.000344985
LOC111090992	0.771702	0.0446655
SORL1	0.770365	0.022269
SETD5	0.767552	0.000771924
PCNT	0.76701	0.00601103
EFTUD2	0.765097	0.0410328
TENT5A	0.763073	0.0292821
RSF1	0.760574	0.00683841
SP100	0.760537	0.0170658
TELO2	0.758506	0.036512
DBF4	0.757162	0.0201749
SRSF11	0.756784	0.00249378
BRCA2	0.75446	0.0210104
PNISR	0.753007	0.000225615
ROCK1	0.751501	2.24339e-05
CWF19L2	0.750391	0.020252
ELOA	0.748716	0.00993608
ZC3H13	0.748359	0.00113134
FRA10AC1	0.746356	0.00703501
CWC22	0.74545	0.00582797
SUZ12	0.743414	0.021694
LARP7	0.74308	0.000222808
AGO2	0.74219	0.00073763
KIAA2026	0.741714	0.0234442
GIN1	0.738103	0.010292
SYNE2	0.73734	0.0174407
PIK3R1	0.734997	0.00683841
RBBP6	0.734219	0.000619986
GNAI2	0.731413	0.00885917
TRA2A	0.730439	0.0124334
SNRNP48	0.730104	0.00885917
CHD1	0.729762	0.00257947
ZRANB2	0.729458	0.00769449
CHD9	0.728892	0.00680005
ST13	0.728403	0.012665
ITPR2	0.726544	0.00404477
RUFY3	0.724302	0.0110876
BRWD3	0.723738	0.00178367
CWC15	0.723624	0.000865437
NMT1	0.723614	0.00659951
TTF1	0.723084	0.00530534
DDX46	0.722938	0.000222808
RAB2A	0.722706	0.0155718
ETAA1	0.720191	0.0129785
UTP3	0.720125	0.00857711
LOC119878183	0.719789	0.036512
TNRC6B	0.719106	0.00101776
CPLANE1	0.716825	0.00450791
DIS3	0.715203	0.00633965
RAD18	0.715093	0.0165928
CEBPZ	0.714915	0.00120485
TOPORS	0.714488	0.00119543
DNMT3A	0.712491	0.0143367
LOC100685053	0.711826	0.0425719
DDX55	0.711812	0.000584349
RABL6	0.706749	0.01819
CCAR1	0.705361	0.00145789
B2M	0.704921	0.0228504
PDCD11	0.702005	0.00179154
NIPBL	0.701562	0.00179154
DDX6	0.701357	0.0228504
ATXN2	0.699754	0.0198783
MKI67	0.699425	0.0279969
MTIF2	0.69927	0.0283964
FAAP100	0.698402	0.0198514
MRPL24	0.697966	0.00610118
LOC119879180	0.695825	0.0204093
TAF3	0.695335	0.0071788
MTIF3	0.693815	0.00698848
ATXN7L1	0.693149	0.00683841
DDX27	0.691909	0.0118765
ASH1L	0.689745	0.00313235
POLR2K	0.688459	0.0126155
SREK1	0.688384	0.00041284
CWC25	0.688218	0.0495441
CYLD	0.687914	0.0437596
KDM5A	0.686196	0.00350701
RBM19	0.685356	0.0127809
LOC119872642	0.684083	0.0118827
DNTTIP2	0.68404	0.00352065
SMARCC1	0.683636	0.0108999
SON	0.683263	0.000216126
GGNBP2	0.676297	0.00024129
KTN1	0.673148	0.00192524
AP2B1	0.672958	0.0223223
HELZ	0.672387	0.00846288
MPHOSPH10	0.671892	0.0419885
MED1	0.669925	0.00683841
PRPF6	0.666015	0.00322543
UTP20	0.665643	0.0206581
ZNF394	0.664146	0.0161406
LOC119876147	0.661911	0.0387693
RALGAPA1	0.661071	0.00683841
MGA	0.659291	0.0116207
HPS5	0.657715	0.00937445
ZNF609	0.655411	0.0218401
KIF15	0.65526	0.019775
ASXL2	0.653926	0.0178164
ITSN2	0.65354	0.0438311
LUC7L3	0.65018	0.00414261
FXR1	0.649101	0.0211432
EDC3	0.645226	0.0446655
SMPD2	0.642066	0.0395807
NKAP	0.641795	0.00454576
PIK3R5	0.637862	0.00336205
CCNH	0.637218	0.0428493
KMT2E	0.636642	0.000431274
RB1CC1	0.634908	0.020837
ILF3	0.633975	0.001378
SPRY4	0.632876	0.0484978
PSMC5	0.632737	0.0146893
PPP1R12A	0.632696	0.00683841
OGFOD1	0.632464	0.0119604
ZFP91	0.631428	0.00601103
TNPO3	0.629788	0.00781262
CHD7	0.627971	0.0189602
ZNF281	0.625654	0.00322543
OTUD3	0.623532	0.0448467
USP24	0.621789	0.000257571
PNN	0.620741	0.00601632
LOC476436	0.618844	0.0275441
NOL7	0.61535	0.0148563
SSB	0.615202	0.0453599
TIPIN	0.614574	0.0305625
SPEN	0.612843	0.00171455
PHF20L1	0.611255	0.00857711
NOL10	0.60964	0.0205199
MUS81	0.608982	0.00857711
MIS18BP1	0.604894	0.0144217
BPTF	0.604842	0.014538
LRRCC1	0.602808	0.0493677
TMEM131L	0.602639	0.0285109
ILKAP	0.595111	0.00956879
CEP350	0.593022	0.0100322
AIF1	0.590641	0.0244259
CRNKL1	0.589865	0.0124334
KLF7	0.585159	0.0322919
CIR1	0.585112	0.0206073
EIF3J	0.583654	0.032911
FNBP4	0.582261	0.010292
MTDH	0.581744	0.00414636
SLX1A	0.580591	0.00838365
ANP32E	0.577593	0.0170848
CDC5L	0.577078	0.0240351
GCC2	0.576506	0.00683841
MTF1	0.576165	0.0251734
TSR1	0.575009	0.0238579
TTC3	0.572852	0.0100317
CHD2	0.570775	0.00685026
LYST	0.570161	0.0210972
PSMD11	0.569983	0.00895119
YTHDC2	0.567715	0.0146684
SASH3	0.567559	0.001378
BCLAF1	0.567285	0.00484709
ATP5PO	0.567037	0.0162214
RBM27	0.56623	0.0156304
NUDT18	0.565838	0.0292821
CEP120	0.565183	0.0157539
ABCF1	0.564004	0.0308717
SRRM2	0.562676	0.00303121
BRD7	0.561928	0.00131262
RPS6KB1	0.561794	0.00777805
COIL	0.560727	0.0257624
TMEM256	0.560724	0.0468263
PABPC4	0.560177	0.022269
GCN1	0.558648	0.0165928
WFS1	0.557313	0.0286556
PTPN2	0.555467	0.018915
PSPC1	0.555373	0.0173254
NCBP3	0.55496	0.012911
RDX	0.554605	0.0473547
ANKRD17	0.55212	0.00844991
IWS1	0.551001	0.0157539
MACF1	0.550141	0.0110876
NRDC	0.545761	0.000798037
BDP1	0.544929	0.0102502
UBR5	0.543715	0.0161065
VPS11	0.538975	0.0360558
TSSC4	0.53876	0.0446097
DENND4A	0.538037	0.0228504
EIF5	0.535546	0.00926846
R3HDM2	0.533063	0.0204093
APC	0.53186	0.0223223
SLTM	0.530845	0.0111663
RBM39	0.530573	0.00601103
EP400	0.529377	0.0144217
GPATCH2	0.526868	0.0198783
SETX	0.526313	0.0458787
LOC609365	0.525296	0.0204093
PRR14L	0.523441	0.0380459
EEF1AKMT2	0.522683	0.034754
SENP6	0.520969	0.036861
OGT	0.515131	0.0483319
RFC1	0.514957	0.0488603
DDX21	0.513102	0.0228504
ATAD2B	0.512882	0.0475987
MED10	0.512494	0.00335297
PRPF4B	0.510908	0.0178164
HIVEP1	0.509065	0.0482854
CCDC91	0.508455	0.0431308
RSL1D1	0.504654	0.0153718
SLC6A6	0.503547	0.0266339
BOLA3	-0.503263	0.0354672
SCOC	-0.505582	0.0343193
TOR1AIP1	-0.507859	0.0283303
PGD	-0.50898	0.0363378
ENOPH1	-0.50943	0.0451427
NDUFA2	-0.510406	7.85572e-06
BBLN	-0.510822	0.00894165
RNF146	-0.513607	0.036861
STMP1	-0.513925	0.0414674
HEBP1	-0.515235	0.013089
LOC119867231	-0.515788	0.0427751
GNA13	-0.516716	0.0061769
IFT20	-0.517812	0.0463874
AP3S1	-0.518303	0.0293856
C15H1orf122	-0.519958	0.00961508
TM2D1	-0.520552	0.0381329
REEP3	-0.522172	0.0381726
ZDHHC12	-0.523936	0.0305625
NNT	-0.524376	0.0462093
MRPL43	-0.526134	0.0138605
SLC38A2	-0.526144	0.00592198
TSPAN3	-0.526339	0.0155804
DGCR2	-0.52638	0.0314836
COPA	-0.527084	0.0134788
PLXNC1	-0.527648	0.00966644
SNX4	-0.528887	0.00206499
YAP1	-0.529208	0.0465397
ANAPC16	-0.530285	0.0140691
MTCH1	-0.531497	0.00434364
CLNS1A	-0.53268	0.0304403
TMED2	-0.532904	0.0320381
SHISA5	-0.53301	0.0252246
HBP1	-0.533796	0.0148563
TSEN15	-0.534395	0.0343559
RAB5B	-0.534842	0.00371151
CDIPT	-0.540347	0.00670067
TRIM7	-0.545593	0.0332688
FAM177A1	-0.545956	0.0387693
LOC119877777	-0.548006	0.0266834
PLD2	-0.548261	0.0437596
RAB11A	-0.548698	0.00547388
STK24	-0.549184	0.0157539
BLOC1S4	-0.55021	0.0379599
ALG6	-0.550784	0.0285171
YPEL5	-0.550884	0.0201749
CIAPIN1	-0.551738	0.0453599
TRAM1	-0.552908	0.00376924
LOC111095154	-0.554885	0.0389115
RAP1A	-0.557231	0.00464833
ERMP1	-0.557461	0.0328025
TBC1D7	-0.560709	0.020837
CTNND1	-0.564256	0.00514199
LOC119877050	-0.566917	0.0468263
KLHL9	-0.567288	0.0451664
EMC4	-0.567305	0.0136734
LOC102154691	-0.568318	0.0375807
PLEKHB2	-0.569121	0.00546385
MARCHF2	-0.571104	0.0446655
ARFIP1	-0.571761	0.0273638
GABARAPL2	-0.571949	0.0459592
PPP1R8	-0.572253	0.0198514
MAST3	-0.575705	0.0495441
SNAP23	-0.57613	0.0251946
LOC106558633	-0.576524	0.0292113
EIF4E	-0.577574	0.00180316
SYAP1	-0.577588	0.0291247
BRK1	-0.578254	0.00273255
SLC25A17	-0.581134	0.0468506
PIGH	-0.581243	0.0484616
AEBP2	-0.58257	0.00441066
LOC119864508	-0.58395	0.0412749
USP22	-0.585547	0.0112893
ARL2BP	-0.587222	0.00356344
CBX4	-0.587699	0.0468263
TMEM167B	-0.592267	0.00894165
LOC119877015	-0.592509	0.00729793
LOC119877588	-0.594123	0.00592198
CRBN	-0.594758	0.0335707
UBE2J1	-0.59485	0.00208452
CCDC122	-0.595049	0.0117308
TNKS2	-0.602193	0.0201749
DPF2	-0.605051	0.0202336
TAF12	-0.608055	0.014538
SCAMP2	-0.608456	0.00698848
OAT	-0.609479	0.022478
ATXN10	-0.612179	0.0228504
SFXN3	-0.613152	0.034754
LOC607874	-0.614069	0.00678116
GTF3A	-0.615203	0.00225593
PREPL	-0.615501	0.0218403
SDHAF1	-0.61698	0.0147012
ING4	-0.617675	0.0369154
LOC119878016	-0.617838	0.0222617
MBLAC2	-0.618028	0.0277968
SH3BP5	-0.620542	0.037326
ABHD2	-0.62335	0.0251947
LOC119873560	-0.624906	0.0223177
RAB12	-0.625787	0.0106851
SHC1	-0.626643	0.00683841
PPP2CB	-0.627008	0.00434364
ADK	-0.629463	0.0421782
NATD1	-0.63068	0.0419885
COBLL1	-0.630912	0.0419885
CTTN	-0.631229	0.0112893
PITHD1	-0.633966	0.0194886
PDP2	-0.637147	0.0395967
CD99	-0.639631	0.0107846
TPGS2	-0.640414	0.00685026
LOC119873934	-0.646707	0.00961508
DYNLRB1	-0.650207	0.00335667
ZNF664	-0.650505	0.00389049
LOC100685381	-0.654735	0.0147678
LOC119876275	-0.6565	0.0170848
SPCS1	-0.65784	2.57107e-05
DGKA	-0.658055	0.00120485
UBQLN4	-0.661428	0.0468506
UBL3	-0.661687	0.0115423
SERINC1	-0.662045	0.0159339
AKIRIN1	-0.662911	0.00453458
SEPTIN2	-0.664461	0.000331945
GNG10	-0.665736	0.000747166
AP1M1	-0.665991	0.018192
TGDS	-0.66638	0.0429005
DOP1B	-0.668739	0.0415829
PAM16	-0.670336	0.00301893
RPL31	-0.670426	0.00778396
TMEM60	-0.677602	0.00961508
DPH3	-0.678474	0.0438311
RP2	-0.678546	0.0123456
EBPL	-0.67933	0.0412708
ZNF580	-0.680246	0.0264967
PKIG	-0.687626	0.0498692
TPM4	-0.689605	0.00640468
C12H6orf226	-0.692806	0.0426103
LOC106558391	-0.695306	0.0167936
CIAO2B	-0.696259	0.00335667
LOC106559504	-0.697265	0.0384851
SEC24D	-0.700301	0.0305625
C12H6orf120	-0.705732	0.00759993
HINT3	-0.706652	0.0274879
FBN1	-0.710208	0.0392485
MED4	-0.710341	0.00505989
TSPYL1	-0.71095	0.0138671
AKT1	-0.71589	0.00109233
ARPC5	-0.727044	0.000664427
LOC111097709	-0.727541	0.00592198
TMEM179B	-0.730519	0.001378
ARPIN	-0.743212	0.00565739
LOC100683001	-0.744631	0.0129714
TGFBR3	-0.751204	0.00601103
BCAS3	-0.75443	0.0136734
NCKAP1	-0.756006	0.0112893
GCLC	-0.75652	0.00352571
LOC106557880	-0.759562	0.00398294
ITM2B	-0.759735	0.00123221
ADCY7	-0.76088	0.0073669
LOC119875963	-0.763875	0.0210104
C4H1orf198	-0.766432	0.00683841
CDR2L	-0.77227	0.0485521
LOC106560120	-0.772939	0.0244691
PIK3R2	-0.775712	0.0325336
LOC119869157	-0.780937	0.000771924
PLPP1	-0.781634	0.0238579
ADD3	-0.783334	0.00630644
LOC111095093	-0.783432	0.000771924
MAPRE3	-0.7871	0.0395967
WASHC3	-0.790405	0.00376924
NTPCR	-0.792149	0.000465478
SH3GLB2	-0.796877	0.0070644
TGFBR2	-0.796945	0.000979912
BMI1	-0.798054	0.0175965
CAV2	-0.805314	0.0451365
CBFB	-0.807744	0.00335667
KIAA1191	-0.824426	0.000102776
POSTN	-0.830181	0.0277968
MAP1LC3B	-0.836731	5.37604e-05
TP53INP1	-0.84105	0.0121519
TMEM168	-0.842157	0.00929601
ANKRD10	-0.851409	0.0078614
HTATIP2	-0.891644	0.000344985
SESN2	-0.895199	0.0225988
SCARA3	-0.895691	0.0235798
FAM25A	-0.89771	0.0392485
SCARA5	-0.924595	0.0304403
RNF11	-0.941671	8.27397e-05
LARP6	-0.945334	0.0392485
ITFG1	-0.945567	0.000620842
CCDC92	-0.960236	0.00356239
MREG	-0.964455	0.0273638
LOC611719	-0.968074	0.00102654
CNOT8	-0.974659	0.00235119
TRIM32	-0.983117	0.0180066
TMEM30B	-0.99096	0.0435338
LDOC1	-0.992019	0.0121519
LPAR1	-0.995193	0.0110876
PYGO1	-1.016	0.0474588
ABI3BP	-1.01727	0.0312636
FHL1	-1.02783	0.0305625
H2BC21	-1.03952	0.00179154
GOLGA7	-1.03979	8.12388e-05
ZMAT3	-1.04753	0.0147012
ACP3	-1.05887	0.00683841
NQO1	-1.06645	0.0305625
MYH11	-1.07195	0.0479667
IRX3	-1.07803	0.0400895
OLFML1	-1.08053	0.00352065
LOC119869674	-1.09032	0.00937445
EPDR1	-1.09354	0.0235798
XG	-1.10174	0.00163266
HSPB1	-1.12128	0.00168747
MCAM	-1.13676	0.01819
PLAC9	-1.14262	0.0211432
LAMTOR2	-1.17147	0.0106043
DDR1	-1.17441	0.0419652
F2RL2	-1.21218	0.0178731
GAS6	-1.23658	0.0178164
C9H17orf58	-1.24683	0.037326
PPT2	-1.2633	0.000741962
GPR153	-1.28335	0.0112893
CHL1	-1.28602	0.03203
ME1	-1.29	0.00683841
GJA1	-1.30394	0.00432872
LOC106557731	-1.30622	0.00589053
PPL	-1.31544	0.0232436
NECTIN1	-1.33203	0.00900785
DGAT2	-1.35864	0.00932298
NIBAN3	-1.38437	0.0448467
CRABP2	-1.39112	0.0285109
CDNF	-1.42528	0.0451365
CD244	-1.43151	0.00948776
JUP	-1.43651	0.00875044
CES1	-1.50146	0.0484616
FGF2	-1.50291	0.0073669
MPIG6B	-1.50643	0.0413491
LOC102151128	-1.51337	0.0484978
TNK1	-1.53068	0.0148563
S100A16	-1.5384	0.0110427
ANXA8L1	-1.54922	0.0325336
PDZK1IP1	-1.56416	0.0366361
FRMD3	-1.5834	0.0454955
FAM89A	-1.60055	0.0448467
GPX3	-1.65248	0.0305625
ARL4D	-1.65701	0.0205967
NKAIN1	-1.6662	0.017929
LRAT	-1.75442	0.0371974
CSTA	-1.79411	0.0172026
LOC100855449	-2.00207	0.000380688
CYS1	-2.02028	0.00423586
ESRP2	-2.10528	0.0205967
F13A1	-2.155	0.000530885
LOC119873228	-2.16097	0.0052236
PON3	-2.50897	0.00589053
TNFAIP8L3	-2.86823	0.000695223
ADTRP	-4.64885	0.0121821

## Sheet: 2avs1 up
g:Pofiler 08.09.24, 2a vs. 1 up
source	term_name	term_id	adjusted_p_value	term_size	query_size	intersection_size	effective_domain_size	intersections
GO:MF	ATP-dependent activity	GO:0140657	0.0000027066615392546535	530	423	38	16834	ATP13A3,DDX59,NVL,HYOU1,CENPE,DDX52,ATAD5,UBA6,ATRX,KIF20B,RAD54L2,RAD50,KIF13B,SMC4,SMC6,INO80,DYNC1H1,RALBP1,SMARCA4,HSP90B1,CHD1,CHD9,DDX46,DDX55,DDX6,DDX27,HELZ,KIF15,PSMC5,CHD7,BPTF,CHD2,YTHDC2,ABCF1,SETX,RFC1,DDX21,ATAD2B
GO:MF	histone binding	GO:0042393	0.00009563042476937488	150	423	17	16834	MPHOSPH8,JAK2,MLLT10,ATRX,BAZ1B,DTX3L,PHIP,SMARCA4,PHF14,DNAJC2,CHD1,KDM5A,KMT2E,ANP32E,CHD2,BRD7,ATAD2B
GO:MF	histone kinase activity	GO:0035173	0.00009873167236391388	20	120	5	16834	ATM,RPS6KA5,PRKDC,JAK2,BAZ1B
GO:MF	ATP-dependent chromatin remodeler activity	GO:0140658	0.00032727314072354495	35	376	8	16834	ATRX,RAD54L2,INO80,SMARCA4,CHD1,CHD9,CHD7,CHD2
GO:MF	catalytic activity, acting on a nucleic acid	GO:0140640	0.00038692361260345663	493	422	32	16834	POLN,DDX59,DDX52,ATAD5,ATRX,RAD54L2,FTSJ3,RAD50,INO80,RARS1,SMARCA4,AGO2,CHD1,CHD9,DDX46,DIS3,DNMT3A,DDX55,NIPBL,DDX6,DDX27,POLR2K,HELZ,CHD7,MUS81,BPTF,SLX1A,CHD2,YTHDC2,SETX,RFC1,DDX21
GO:MF	histone H2AX kinase activity	GO:0141003	0.0005761368488145022	4	120	3	16834	ATM,PRKDC,BAZ1B
GO:MF	enzyme binding	GO:0019899	0.0008211519798563408	1358	260	44	16834	PPP1R27,NR3C1,TCF7L2,LMNB1,PLCE1,IQGAP1,SERPINE1,UTRN,AKAP8,DIAPH3,EGR2,TRAF5,BHLHE41,JAK2,MIER1,TRAF3,NOP14,ZBTB1,DTX3L,ZFP36,SPART,PTEN,MLEC,SMC6,GOLGA4,TCERG1,RALBP1,PCF11,SMARCA4,ZC3HC1,PKN2,CCNYL1,NOP58,SYK,HSP90B1,GTF2F1,CEP152,SORL1,SP100,TELO2,ROCK1,AGO2,PIK3R1,RBBP6
GO:MF	helicase activity	GO:0004386	0.0011328425326284394	124	422	14	16834	DDX59,DDX52,RAD50,SMARCA4,CHD9,DDX46,DDX55,DDX6,DDX27,HELZ,CHD7,YTHDC2,SETX,DDX21
GO:MF	catalytic activity, acting on DNA	GO:0140097	0.0019641483692521685	187	376	16	16834	POLN,ATAD5,ATRX,RAD54L2,RAD50,INO80,SMARCA4,CHD1,CHD9,DNMT3A,NIPBL,CHD7,MUS81,BPTF,SLX1A,CHD2
GO:MF	ATP-dependent activity, acting on DNA	GO:0008094	0.004544376834823639	104	421	12	16834	ATAD5,ATRX,RAD54L2,RAD50,INO80,SMARCA4,CHD1,CHD9,CHD7,BPTF,CHD2,RFC1
GO:MF	DNA-dependent protein kinase activity	GO:0004677	0.009606389657642956	2	82	2	16834	ATM,PRKDC
GO:MF	modification-dependent protein binding	GO:0140030	0.021643572866024745	140	423	13	16834	MPHOSPH8,ATRX,ZBTB1,PHIP,SMARCA4,DNAJC2,CHD1,RAD18,KDM5A,KMT2E,PHF20L1,BRD7,ATAD2B
GO:MF	mRNA binding	GO:0003729	0.02549418159702115	195	397	15	16834	ZFP36,GNL3,PCF11,LUC7L,NSRP1,RBM25,AGO2,LUC7L3,FXR1,EDC3,NKAP,ILF3,SSB,PABPC4,NCBP3
GO:MF	protein-containing complex binding	GO:0044877	0.026450890597720482	1015	420	46	16834	PLEC,TNRC18,ATM,UTRN,NVL,EGR2,CENPF,DLA-DRA,MPHOSPH8,ACTN1,MLLT10,ATRX,LGALS8,ZFP36,ICAM3,SMC4,PTEN,CLSPN,ADAM17,DNAJC2,NOP58,SYK,GTF2F1,SORL1,TELO2,SUZ12,GNAI2,RAD18,DNMT3A,NIPBL,MTIF3,ASH1L,SMARCC1,MED1,PRPF6,ZNF609,NKAP,CHD7,AIF1,CIR1,GCN1,ANKRD17,TSSC4,APC,EP400,OGT
GO:MF	histone H2AXS139 kinase activity	GO:0035979	0.028727853481886667	3	82	2	16834	ATM,PRKDC
GO:MF	chromo shadow domain binding	GO:0070087	0.04032084271061875	6	291	3	16834	ATRX,SP100,NIPBL
GO:BP	cell cycle process	GO:0022402	0.000002518448488134064	808	410	49	17277	PLEC,ATM,ASPM,AKAP8,DIAPH3,CENPE,CENPF,ATAD5,PRKDC,CEP135,MTBP,MITD1,ATRX,CENPJ,CEP295,BAZ1B,KIF20B,DTX3L,DCAF13,GIGYF2,SMC4,THOC1,PTEN,PIBF1,SMC6,INO80,CENPC,DYNC1H1,CLSPN,ADAM17,PKN2,CEP152,PCNT,ETAA1,RAD18,NIPBL,SON,MED1,CCNH,KMT2E,PPP1R12A,TIPIN,AIF1,CDC5L,CEP120,BRD7,RPS6KB1,ANKRD17,APC
GO:BP	positive regulation of nucleobase-containing compound metabolic process	GO:0045935	0.000004203889885085954	1367	381	65	17277	BRD8,NR3C1,TCF7L2,ARID5B,ATM,RPS6KA5,TGFB2,EGR2,ATAD5,PRKDC,ETV6,JAK2,ACTN1,MLLT10,ATRX,BAZ1B,ZC3HAV1,TAF4B,CEP290,DTX3L,GIGYF2,RAD50,ZFP36,RIF1,THOC1,INO80,GNL3,PHIP,ANKRD49,ARID4A,SMARCA4,DNAJC2,GTF2F1,THRAP3,SP100,ROCK1,LARP7,AGO2,PIK3R1,TNRC6B,CEBPZ,TOPORS,CCAR1,NIPBL,TAF3,ASH1L,KDM5A,SMARCC1,MED1,PRPF6,MGA,ZNF609,ASXL2,FXR1,KMT2E,ILF3,PPP1R12A,CHD7,ZNF281,BPTF,KLF7,SLX1A,CDC5L,MTF1,BCLAF1
GO:BP	positive regulation of RNA metabolic process	GO:0051254	0.0000048738208959142254	1247	381	61	17277	BRD8,NR3C1,TCF7L2,ARID5B,ATM,RPS6KA5,TGFB2,EGR2,PRKDC,ETV6,JAK2,ACTN1,MLLT10,ATRX,BAZ1B,ZC3HAV1,TAF4B,CEP290,DTX3L,GIGYF2,ZFP36,THOC1,INO80,GNL3,PHIP,ANKRD49,ARID4A,SMARCA4,DNAJC2,GTF2F1,THRAP3,SP100,ROCK1,LARP7,AGO2,PIK3R1,TNRC6B,CEBPZ,TOPORS,CCAR1,NIPBL,TAF3,ASH1L,KDM5A,SMARCC1,MED1,PRPF6,MGA,ZNF609,ASXL2,FXR1,KMT2E,ILF3,PPP1R12A,CHD7,ZNF281,BPTF,KLF7,CDC5L,MTF1,BCLAF1
GO:BP	positive regulation of cellular biosynthetic process	GO:0031328	0.000010296376486025563	1775	426	83	17277	BRD8,NR3C1,TCF7L2,RAB1A,ARID5B,ATM,RPS6KA5,SERPINE1,TGFB2,EGR2,TRAF5,ATAD5,PRKDC,ETV6,JAK2,ACTN1,MLLT10,ATRX,TRAF3,BAZ1B,TAF4B,CEP290,DTX3L,ZFP36,RIF1,THOC1,PIBF1,LACC1,INO80,GNL3,PHIP,ANKRD49,ARID4A,PAOX,SMARCA4,ADAM17,DNAJC2,SYK,LARP1B,GTF2F1,THRAP3,SORL1,SP100,ROCK1,LARP7,AGO2,PIK3R1,CEBPZ,TOPORS,CCAR1,B2M,NIPBL,TAF3,ASH1L,KDM5A,SMARCC1,MED1,PRPF6,MGA,ZNF609,ASXL2,FXR1,KMT2E,ILF3,PPP1R12A,CHD7…
GO:BP	positive regulation of nitrogen compound metabolic process	GO:0051173	0.000012970132580304655	1845	426	85	17277	BRD8,NR3C1,TCF7L2,RAB1A,ARID5B,ATM,RPS6KA5,TMTC3,TGFB2,EGR2,CBLB,ATAD5,PRKDC,ETV6,AKAP9,JAK2,ACTN1,MLLT10,ATRX,CEP295,BAZ1B,ZC3HAV1,TAF4B,CEP290,DTX3L,GIGYF2,RAD50,ZFP36,RIF1,THOC1,PTEN,PIBF1,INO80,GNL3,PHIP,ANKRD49,RALBP1,ARID4A,PAOX,SMARCA4,DNAJC2,SYK,GTF2F1,THRAP3,SORL1,SP100,ROCK1,LARP7,AGO2,PIK3R1,TNRC6B,CEBPZ,TOPORS,CCAR1,NIPBL,TAF3,ASH1L,KDM5A,SMARCC1,MED1,PRPF6,MGA,ZNF609,ASXL2,FXR1,KMT2E…
GO:BP	positive regulation of macromolecule metabolic process	GO:0010604	0.000014242354314206926	2160	426	95	17277	BRD8,NR3C1,TCF7L2,RAB1A,ARID5B,ATM,RPS6KA5,SERPINE1,TMTC3,TGFB2,EGR2,CBLB,TRAF5,ATAD5,PRKDC,ETV6,AKAP9,JAK2,ACTN1,MLLT10,ATRX,TRAF3,CEP295,BAZ1B,ZC3HAV1,TAF4B,CEP290,DTX3L,GIGYF2,RAD50,ZFP36,RIF1,THOC1,PTEN,PIBF1,LACC1,INO80,GNL3,PHIP,ANKRD49,RALBP1,ARID4A,SMARCA4,ADAM17,DNAJC2,SYK,LARP1B,GTF2F1,THRAP3,SORL1,SP100,ROCK1,LARP7,AGO2,PIK3R1,TNRC6B,CEBPZ,TOPORS,CCAR1,B2M,NIPBL,TAF3,ASH1L,KDM5A,SMARCC…
GO:BP	positive regulation of macromolecule biosynthetic process	GO:0010557	0.000014319740108531589	1727	426	81	17277	BRD8,NR3C1,TCF7L2,RAB1A,ARID5B,ATM,RPS6KA5,SERPINE1,TGFB2,EGR2,TRAF5,ATAD5,PRKDC,ETV6,JAK2,ACTN1,MLLT10,ATRX,TRAF3,BAZ1B,TAF4B,CEP290,DTX3L,ZFP36,RIF1,THOC1,PIBF1,LACC1,INO80,GNL3,PHIP,ANKRD49,ARID4A,SMARCA4,ADAM17,DNAJC2,SYK,LARP1B,GTF2F1,THRAP3,SORL1,SP100,ROCK1,LARP7,AGO2,PIK3R1,CEBPZ,TOPORS,CCAR1,B2M,NIPBL,TAF3,ASH1L,KDM5A,SMARCC1,MED1,PRPF6,MGA,ZNF609,ASXL2,FXR1,KMT2E,ILF3,PPP1R12A,CHD7,ZNF2…
GO:BP	positive regulation of biosynthetic process	GO:0009891	0.000014781674447952012	1789	426	83	17277	BRD8,NR3C1,TCF7L2,RAB1A,ARID5B,ATM,RPS6KA5,SERPINE1,TGFB2,EGR2,TRAF5,ATAD5,PRKDC,ETV6,JAK2,ACTN1,MLLT10,ATRX,TRAF3,BAZ1B,TAF4B,CEP290,DTX3L,ZFP36,RIF1,THOC1,PIBF1,LACC1,INO80,GNL3,PHIP,ANKRD49,ARID4A,PAOX,SMARCA4,ADAM17,DNAJC2,SYK,LARP1B,GTF2F1,THRAP3,SORL1,SP100,ROCK1,LARP7,AGO2,PIK3R1,CEBPZ,TOPORS,CCAR1,B2M,NIPBL,TAF3,ASH1L,KDM5A,SMARCC1,MED1,PRPF6,MGA,ZNF609,ASXL2,FXR1,KMT2E,ILF3,PPP1R12A,CHD7…
GO:BP	cell cycle	GO:0007049	0.000014912369029043054	1077	399	56	17277	PLEC,BRD8,SPECC1L,IQGAP1,ATM,ASPM,AKAP8,DIAPH3,CENPE,CENPF,EPB41,ATAD5,PRKDC,CEP135,MTBP,MITD1,ATRX,CENPJ,CEP295,BAZ1B,KIF20B,DTX3L,DCAF13,GIGYF2,RIF1,SMC4,THOC1,PTEN,PIBF1,SMC6,INO80,CENPC,DYNC1H1,CLSPN,ADAM17,PKN2,CCNYL1,CEP152,PCNT,ETAA1,RAD18,NIPBL,MKI67,CYLD,SON,MED1,CCNH,KMT2E,PPP1R12A,TIPIN,AIF1,CDC5L,CEP120,BRD7,RPS6KB1,ANKRD17
GO:BP	regulation of nitrogen compound metabolic process	GO:0051171	0.000017890523143284724	3392	426	132	17277	BRD8,NR3C1,TCF7L2,RAB1A,ARID5B,ATM,RPS6KA5,SERPINE1,TMTC3,TGFB2,EGR2,CBLB,TRAF5,CENPF,ATAD5,PRKDC,ETV6,AKAP9,MPHOSPH8,BHLHE41,JAK2,ACTN1,MTBP,MLLT10,MIER1,PUF60,ATRX,TRAF3,CEP295,BAZ1B,ZC3HAV1,EIF5B,TAF4B,CEP290,MED14,ZBTB1,DTX3L,GIGYF2,RAD50,ZFP36,RIF1,THOC1,PTEN,FAM172A,RLF,PIBF1,LACC1,INO80,BRWD1,GNL3,TCERG1,PHIP,ANKRD49,RALBP1,ARID4A,PAOX,GLG1,SMARCA4,PHF14,DNAJC2,CCNYL1,SYK,NSRP1,LARP1B,RBM2…
GO:BP	regulation of cell cycle process	GO:0010564	0.00002389492185086164	457	410	33	17277	ATM,CENPE,CENPF,ATAD5,PRKDC,MTBP,ATRX,CEP295,BAZ1B,KIF20B,DTX3L,GIGYF2,SMC4,THOC1,PTEN,SMC6,INO80,DYNC1H1,CLSPN,ADAM17,PKN2,ETAA1,RAD18,MED1,CCNH,KMT2E,TIPIN,AIF1,CDC5L,CEP120,BRD7,ANKRD17,APC
GO:BP	non-membrane-bounded organelle assembly	GO:0140694	0.000028164085632985935	246	193	16	17277	PLEC,ASPM,DIAPH3,CENPE,PRKDC,CEP135,CENPJ,CEP295,EIF5B,DCAF13,PTEN,PIBF1,INO80,CENPC,PRRC2C,DYNC1H1
GO:BP	positive regulation of cellular metabolic process	GO:0031325	0.00003519944339328456	2136	426	93	17277	BRD8,NR3C1,TCF7L2,RAB1A,ARID5B,ATM,RPS6KA5,SERPINE1,TGFB2,EGR2,TRAF5,ATAD5,PRKDC,ETV6,AKAP9,JAK2,ACTN1,MLLT10,ATRX,TRAF3,BAZ1B,ZC3HAV1,TAF4B,CEP290,DTX3L,GIGYF2,RAD50,ZFP36,RIF1,THOC1,PIBF1,LACC1,INO80,GNL3,PHIP,ANKRD49,RALBP1,ARID4A,PAOX,SMARCA4,ADAM17,DNAJC2,SYK,LARP1B,GTF2F1,THRAP3,SORL1,SP100,ROCK1,LARP7,AGO2,PIK3R1,TNRC6B,CEBPZ,TOPORS,CCAR1,B2M,NIPBL,TAF3,ASH1L,KDM5A,SMARCC1,MED1,PRPF6,MGA,Z…
GO:BP	positive regulation of metabolic process	GO:0009893	0.00005238967700123329	2346	426	99	17277	BRD8,NR3C1,TCF7L2,RAB1A,ARID5B,ATM,RPS6KA5,SERPINE1,TMTC3,TGFB2,EGR2,CBLB,TRAF5,ATAD5,PRKDC,ETV6,AKAP9,JAK2,ACTN1,MLLT10,ATRX,TRAF3,CEP295,BAZ1B,ZC3HAV1,TAF4B,CEP290,DTX3L,GIGYF2,RAD50,ZFP36,RIF1,THOC1,PTEN,PIBF1,LACC1,INO80,GNL3,DYNC1H1,PHIP,ANKRD49,RALBP1,ARID4A,PAOX,SMARCA4,ADAM17,DNAJC2,SYK,LARP1B,GTF2F1,THRAP3,SORL1,SP100,ROCK1,LARP7,AGO2,PIK3R1,TNRC6B,CEBPZ,TOPORS,CCAR1,B2M,NIPBL,TAF3,ASH1L…
GO:BP	positive regulation of DNA-templated transcription	GO:0045893	0.00007466626071979678	1152	381	55	17277	BRD8,NR3C1,TCF7L2,ARID5B,ATM,RPS6KA5,TGFB2,EGR2,PRKDC,ETV6,JAK2,ACTN1,MLLT10,ATRX,BAZ1B,TAF4B,CEP290,DTX3L,THOC1,INO80,GNL3,PHIP,ANKRD49,ARID4A,SMARCA4,DNAJC2,GTF2F1,THRAP3,SP100,LARP7,AGO2,PIK3R1,CEBPZ,TOPORS,CCAR1,NIPBL,TAF3,ASH1L,KDM5A,SMARCC1,MED1,PRPF6,MGA,ZNF609,ASXL2,KMT2E,ILF3,PPP1R12A,CHD7,ZNF281,BPTF,KLF7,CDC5L,MTF1,BCLAF1
GO:BP	regulation of RNA metabolic process	GO:0051252	0.00007525040882273887	2428	426	101	17277	BRD8,NR3C1,TCF7L2,ARID5B,ATM,RPS6KA5,TGFB2,EGR2,TRAF5,CENPF,PRKDC,ETV6,MPHOSPH8,BHLHE41,JAK2,ACTN1,MLLT10,MIER1,PUF60,ATRX,TRAF3,BAZ1B,ZC3HAV1,TAF4B,CEP290,MED14,ZBTB1,DTX3L,GIGYF2,ZFP36,RIF1,THOC1,FAM172A,RLF,INO80,BRWD1,GNL3,TCERG1,PHIP,ANKRD49,ARID4A,SMARCA4,PHF14,DNAJC2,NSRP1,LARP1B,RBM25,GTF2F1,THRAP3,SETD5,SP100,ROCK1,SUZ12,LARP7,AGO2,PIK3R1,TNRC6B,CEBPZ,TOPORS,DNMT3A,CCAR1,NIPBL,TAF3,ASH1L…
GO:BP	positive regulation of RNA biosynthetic process	GO:1902680	0.00007913500943764676	1154	381	55	17277	BRD8,NR3C1,TCF7L2,ARID5B,ATM,RPS6KA5,TGFB2,EGR2,PRKDC,ETV6,JAK2,ACTN1,MLLT10,ATRX,BAZ1B,TAF4B,CEP290,DTX3L,THOC1,INO80,GNL3,PHIP,ANKRD49,ARID4A,SMARCA4,DNAJC2,GTF2F1,THRAP3,SP100,LARP7,AGO2,PIK3R1,CEBPZ,TOPORS,CCAR1,NIPBL,TAF3,ASH1L,KDM5A,SMARCC1,MED1,PRPF6,MGA,ZNF609,ASXL2,KMT2E,ILF3,PPP1R12A,CHD7,ZNF281,BPTF,KLF7,CDC5L,MTF1,BCLAF1
GO:BP	regulation of nucleobase-containing compound metabolic process	GO:0019219	0.00008028655016853777	2628	426	107	17277	BRD8,NR3C1,TCF7L2,ARID5B,ATM,RPS6KA5,TGFB2,EGR2,TRAF5,CENPF,ATAD5,PRKDC,ETV6,MPHOSPH8,BHLHE41,JAK2,ACTN1,MLLT10,MIER1,PUF60,ATRX,TRAF3,BAZ1B,ZC3HAV1,TAF4B,CEP290,MED14,ZBTB1,DTX3L,GIGYF2,RAD50,ZFP36,RIF1,THOC1,FAM172A,RLF,LACC1,INO80,BRWD1,GNL3,TCERG1,PHIP,ANKRD49,ARID4A,SMARCA4,PHF14,DNAJC2,NSRP1,LARP1B,RBM25,GTF2F1,THRAP3,SETD5,SP100,ROCK1,SUZ12,LARP7,AGO2,PIK3R1,RBBP6,TNRC6B,CEBPZ,TOPORS,DNMT3…
GO:BP	regulation of primary metabolic process	GO:0080090	0.00010681679405583267	3491	426	132	17277	BRD8,NR3C1,TCF7L2,RAB1A,ARID5B,ATM,RPS6KA5,SERPINE1,TMTC3,TGFB2,EGR2,CBLB,TRAF5,CENPF,ATAD5,PRKDC,ETV6,AKAP9,MPHOSPH8,BHLHE41,JAK2,ACTN1,MTBP,MLLT10,MIER1,PUF60,ATRX,TRAF3,CEP295,BAZ1B,ZC3HAV1,EIF5B,TAF4B,CEP290,MED14,ZBTB1,DTX3L,GIGYF2,RAD50,ZFP36,RIF1,THOC1,PTEN,FAM172A,RLF,PIBF1,LACC1,INO80,BRWD1,GNL3,TCERG1,PHIP,ANKRD49,RALBP1,ARID4A,PAOX,GLG1,SMARCA4,PHF14,DNAJC2,CCNYL1,SYK,NSRP1,LARP1B,RBM2…
GO:BP	positive regulation of cellular process	GO:0048522	0.000109134000154922	3674	429	138	17277	BRD8,NR3C1,TCF7L2,RAB1A,PLCE1,TNFRSF11A,IQGAP1,ARID5B,CXCL10,TNFSF10,ATM,ASPM,RPS6KA5,SERPINE1,UTRN,FMN1,SHTN1,TGFB2,EGR2,PDIA3,ARHGAP35,TRAF5,DLA-DRA,EPB41,ATAD5,PRKDC,ETV6,APBB1IP,AKAP9,CEP135,MPHOSPH8,JAK2,ACTN1,USP34,MTBP,MLLT10,ATRX,TRAF3,CENPJ,CEP295,BAZ1B,ZC3HAV1,KIF20B,TAF4B,CEP290,ZBTB1,DTX3L,GIGYF2,RAD50,ZFP36,RIF1,SMC4,THOC1,PIBF1,LACC1,SMC6,INO80,GNL3,GOLGA4,IL18RAP,DYNC1H1,PHIP,ANKRD…
GO:BP	positive regulation of cell cycle process	GO:0090068	0.0001119581578510708	168	399	18	17277	ATAD5,MTBP,ATRX,CEP295,KIF20B,SMC4,THOC1,SMC6,INO80,DYNC1H1,ADAM17,PKN2,RAD18,MED1,KMT2E,AIF1,CEP120,ANKRD17
GO:BP	protein-DNA complex organization	GO:0071824	0.00015341368075595833	504	422	34	17277	NR3C1,RPS6KA5,CENPE,MPHOSPH8,JAK2,MIER1,ATRX,BAZ1B,RAD54L2,ZBTB1,DTX3L,DCAF13,RIF1,INO80,CENPC,ARID4A,SMARCA4,SETD5,SUZ12,CHD1,CHD9,DNMT3A,NIPBL,TAF3,ASH1L,KDM5A,SMARCC1,CHD7,BPTF,CHD2,BRD7,IWS1,UBR5,DDX21
GO:BP	regulation of cell cycle	GO:0051726	0.00023659723135374943	684	410	40	17277	BRD8,IQGAP1,ATM,ASPM,CENPE,CENPF,ATAD5,PRKDC,MTBP,ATRX,CEP295,BAZ1B,KIF20B,DTX3L,GIGYF2,SMC4,THOC1,PTEN,SMC6,INO80,DYNC1H1,CLSPN,ADAM17,PKN2,CCNYL1,ETAA1,RAD18,CYLD,SON,MED1,CCNH,KMT2E,TIPIN,AIF1,CDC5L,CEP120,BRD7,RPS6KB1,ANKRD17,APC
GO:BP	chromatin remodeling	GO:0006338	0.00025203855879468864	396	422	29	17277	RPS6KA5,MPHOSPH8,JAK2,MIER1,ATRX,BAZ1B,RAD54L2,ZBTB1,DTX3L,DCAF13,RIF1,INO80,ARID4A,SMARCA4,SETD5,SUZ12,CHD1,CHD9,DNMT3A,NIPBL,ASH1L,SMARCC1,CHD7,BPTF,CHD2,BRD7,IWS1,UBR5,DDX21
GO:BP	chromosome segregation	GO:0007059	0.00026923246699349953	253	193	15	17277	ATM,ASPM,AKAP8,DIAPH3,CENPE,CENPF,BAZ1B,DCAF13,SMC4,PTEN,PIBF1,SMC6,INO80,CENPC,DYNC1H1
GO:BP	regulation of mRNA metabolic process	GO:1903311	0.000364405304692929	195	412	19	17277	TRAF5,PUF60,ZC3HAV1,GIGYF2,ZFP36,FAM172A,NSRP1,LARP1B,RBM25,THRAP3,ROCK1,LARP7,AGO2,TNRC6B,SON,FXR1,PABPC4,IWS1,RBM39
GO:BP	mitotic cell cycle	GO:0000278	0.00037752349339663187	539	410	34	17277	IQGAP1,ATM,AKAP8,CENPE,CENPF,ATAD5,PRKDC,MTBP,MITD1,BAZ1B,KIF20B,GIGYF2,SMC4,PTEN,PIBF1,INO80,CENPC,DYNC1H1,CLSPN,ADAM17,PKN2,PCNT,NIPBL,CYLD,SON,CCNH,KMT2E,PPP1R12A,TIPIN,AIF1,BRD7,RPS6KB1,ANKRD17,APC
GO:BP	regulation of cell cycle phase transition	GO:1901987	0.00045055428316682867	260	410	22	17277	ATM,CENPE,CENPF,ATAD5,PRKDC,MTBP,DTX3L,GIGYF2,THOC1,PTEN,INO80,CLSPN,ADAM17,ETAA1,CCNH,KMT2E,TIPIN,AIF1,CDC5L,BRD7,ANKRD17,APC
GO:BP	chromatin organization	GO:0006325	0.0007441984236727318	465	422	31	17277	NR3C1,RPS6KA5,MPHOSPH8,JAK2,MIER1,ATRX,BAZ1B,RAD54L2,ZBTB1,DTX3L,DCAF13,RIF1,INO80,ARID4A,SMARCA4,SETD5,SUZ12,CHD1,CHD9,DNMT3A,NIPBL,ASH1L,KDM5A,SMARCC1,CHD7,BPTF,CHD2,BRD7,IWS1,UBR5,DDX21
GO:BP	regulation of G1/S transition of mitotic cell cycle	GO:2000045	0.0009275882770564769	83	410	12	17277	PRKDC,MTBP,GIGYF2,PTEN,INO80,ADAM17,CCNH,KMT2E,AIF1,BRD7,ANKRD17,APC
GO:BP	DNA damage response	GO:0006974	0.0011846102284624853	603	421	36	17277	POLN,BRD8,ATM,ATAD5,PRKDC,POLD2,ATRX,BAZ1B,ZBTB1,DTX3L,GIGYF2,BOD1L1,RAD50,RIF1,THOC1,SMC6,INO80,CLSPN,SP100,PIK3R1,RBBP6,ETAA1,RAD18,TOPORS,NIPBL,FAAP100,TIPIN,MUS81,SLX1A,CDC5L,CHD2,BCLAF1,UBR5,APC,SETX,RFC1
GO:BP	positive regulation of cell cycle	GO:0045787	0.0015442486213849153	221	399	19	17277	ATAD5,MTBP,ATRX,CEP295,KIF20B,SMC4,THOC1,SMC6,INO80,DYNC1H1,ADAM17,PKN2,RAD18,MED1,KMT2E,AIF1,CEP120,RPS6KB1,ANKRD17
GO:BP	positive regulation of biological process	GO:0048518	0.0016545088559941474	4021	404	136	17277	BRD8,NR3C1,TCF7L2,RAB1A,PLCE1,TNFRSF11A,IQGAP1,ARID5B,CXCL10,TNFSF10,ATM,ASPM,RPS6KA5,SERPINE1,UTRN,FMN1,SHTN1,TMTC3,TGFB2,EGR2,CBLB,PDIA3,ARHGAP35,TRAF5,DLA-DRA,EPB41,ATAD5,PRKDC,ETV6,APBB1IP,AKAP9,CEP135,MPHOSPH8,JAK2,ACTN1,USP34,MTBP,MLLT10,ATRX,TRAF3,CENPJ,CEP295,BAZ1B,ZC3HAV1,KIF20B,TAF4B,CEP290,ZBTB1,DTX3L,GIGYF2,RAD50,ZFP36,RIF1,SMC4,THOC1,PTEN,PIBF1,LACC1,SMC6,INO80,GNL3,GOLGA4,IL18RAP,DY…
GO:BP	cell cycle phase transition	GO:0044770	0.0020525535278182456	330	410	24	17277	ATM,AKAP8,CENPE,CENPF,ATAD5,PRKDC,MTBP,DTX3L,GIGYF2,THOC1,PTEN,INO80,CLSPN,ADAM17,ETAA1,CCNH,KMT2E,TIPIN,AIF1,CDC5L,BRD7,RPS6KB1,ANKRD17,APC
GO:BP	mitotic cell cycle process	GO:1903047	0.0021313941560394192	452	410	29	17277	ATM,AKAP8,CENPE,CENPF,ATAD5,PRKDC,MTBP,MITD1,BAZ1B,KIF20B,GIGYF2,SMC4,PTEN,PIBF1,INO80,DYNC1H1,CLSPN,ADAM17,PCNT,NIPBL,SON,CCNH,KMT2E,TIPIN,AIF1,BRD7,RPS6KB1,ANKRD17,APC
GO:BP	DNA-templated transcription	GO:0006351	0.00273628089958374	2348	426	93	17277	BRD8,NR3C1,TCF7L2,ARID5B,ATM,RPS6KA5,TGFB2,CDC73,EGR2,CENPF,PRKDC,ETV6,MPHOSPH8,BHLHE41,JAK2,ACTN1,MLLT10,MIER1,ATRX,TRAF3,BAZ1B,TAF4B,CEP290,MED14,ZBTB1,DTX3L,ZFP36,RIF1,THOC1,RLF,INO80,BRWD1,GNL3,TCERG1,PHIP,ANKRD49,ARID4A,PCF11,SMARCA4,PHF14,DNAJC2,TCEA1,CRCP,GTF2F1,THRAP3,SETD5,SP100,ELOA,SUZ12,LARP7,AGO2,PIK3R1,CEBPZ,TOPORS,DNMT3A,CCAR1,NIPBL,TAF3,ASH1L,POLR2K,KDM5A,SMARCC1,MED1,PRPF6,ZNF394…
GO:BP	positive regulation of organelle organization	GO:0010638	0.0028712324769385143	337	198	16	17277	TNFSF10,ATM,FMN1,ARHGAP35,AKAP9,CEP135,MPHOSPH8,ATRX,CENPJ,CEP295,RAD50,SMC4,INO80,GNL3,DYNC1H1,RALBP1
GO:BP	nuclear chromosome segregation	GO:0098813	0.0034352013890583755	196	193	12	17277	ATM,ASPM,AKAP8,CENPE,CENPF,BAZ1B,DCAF13,SMC4,PTEN,PIBF1,INO80,DYNC1H1
GO:BP	G1/S transition of mitotic cell cycle	GO:0000082	0.0036916956988341295	111	410	13	17277	PRKDC,MTBP,GIGYF2,PTEN,INO80,ADAM17,CCNH,KMT2E,AIF1,BRD7,RPS6KB1,ANKRD17,APC
GO:BP	transcription by RNA polymerase II	GO:0006366	0.0037992366748246017	1496	426	66	17277	BRD8,NR3C1,TCF7L2,ARID5B,ATM,RPS6KA5,CDC73,EGR2,PRKDC,ETV6,BHLHE41,JAK2,MLLT10,ATRX,TAF4B,MED14,ZBTB1,ZFP36,RIF1,RLF,INO80,BRWD1,PHIP,ARID4A,PCF11,SMARCA4,PHF14,TCEA1,GTF2F1,THRAP3,SP100,ELOA,SUZ12,LARP7,AGO2,PIK3R1,CEBPZ,DNMT3A,NIPBL,TAF3,ASH1L,SMARCC1,MED1,PRPF6,ZNF609,ASXL2,NKAP,CCNH,PSMC5,PPP1R12A,CHD7,ZNF281,SPEN,BPTF,KLF7,CIR1,CDC5L,MTF1,BRD7,PTPN2,IWS1,SETX,OGT,DDX21,MED10,HIVEP1
GO:BP	RNA biosynthetic process	GO:0032774	0.003801061940601068	2366	426	93	17277	BRD8,NR3C1,TCF7L2,ARID5B,ATM,RPS6KA5,TGFB2,CDC73,EGR2,CENPF,PRKDC,ETV6,MPHOSPH8,BHLHE41,JAK2,ACTN1,MLLT10,MIER1,ATRX,TRAF3,BAZ1B,TAF4B,CEP290,MED14,ZBTB1,DTX3L,ZFP36,RIF1,THOC1,RLF,INO80,BRWD1,GNL3,TCERG1,PHIP,ANKRD49,ARID4A,PCF11,SMARCA4,PHF14,DNAJC2,TCEA1,CRCP,GTF2F1,THRAP3,SETD5,SP100,ELOA,SUZ12,LARP7,AGO2,PIK3R1,CEBPZ,TOPORS,DNMT3A,CCAR1,NIPBL,TAF3,ASH1L,POLR2K,KDM5A,SMARCC1,MED1,PRPF6,ZNF394…
GO:BP	chromosome organization	GO:0051276	0.004539495598850514	370	187	16	17277	TCF7L2,ATM,AKAP8,CENPE,PRKDC,MPHOSPH8,ATRX,BAZ1B,RAD50,RIF1,SMC4,PIBF1,SMC6,INO80,CENPC,GNL3
GO:BP	regulation of cell cycle G1/S phase transition	GO:1902806	0.005063086843531487	97	410	12	17277	PRKDC,MTBP,GIGYF2,PTEN,INO80,ADAM17,CCNH,KMT2E,AIF1,BRD7,ANKRD17,APC
GO:BP	regulation of mitotic cell cycle	GO:0007346	0.0058566222379082275	303	410	22	17277	IQGAP1,ATM,CENPE,CENPF,ATAD5,PRKDC,MTBP,GIGYF2,PTEN,INO80,CLSPN,ADAM17,PKN2,CYLD,CCNH,KMT2E,TIPIN,AIF1,BRD7,RPS6KB1,ANKRD17,APC
GO:BP	regulation of mitotic cell cycle phase transition	GO:1901990	0.0068566761611081025	195	410	17	17277	ATM,CENPE,CENPF,ATAD5,PRKDC,MTBP,GIGYF2,PTEN,INO80,CLSPN,ADAM17,CCNH,KMT2E,AIF1,BRD7,ANKRD17,APC
GO:BP	negative regulation of nitrogen compound metabolic process	GO:0051172	0.007647380878938496	1282	396	55	17277	NR3C1,TCF7L2,ARID5B,ATM,RPS6KA5,SERPINE1,TRAF5,CENPF,ETV6,MPHOSPH8,BHLHE41,ZBTB1,GIGYF2,RAD50,ZFP36,RIF1,THOC1,PTEN,PIBF1,ARID4A,GLG1,SMARCA4,PHF14,DNAJC2,LARP1B,THRAP3,SORL1,SETD5,SP100,ROCK1,SUZ12,LARP7,AGO2,TNRC6B,DNMT3A,CCAR1,NIPBL,TAF3,SMARCC1,GGNBP2,MED1,FXR1,NKAP,ILF3,PSMC5,ZNF281,SPEN,PHF20L1,BPTF,KLF7,CIR1,BCLAF1,BRD7,PTPN2,PSPC1
GO:BP	regulation of macromolecule metabolic process	GO:0060255	0.009453125833386684	4138	426	142	17277	BRD8,NR3C1,TCF7L2,RAB1A,IQGAP1,ARID5B,ATM,RPS6KA5,SERPINE1,AKAP8,TMTC3,TGFB2,EGR2,CBLB,TRAF5,CENPF,ATAD5,PRKDC,ETV6,AKAP9,MPHOSPH8,BHLHE41,JAK2,ACTN1,MTBP,MLLT10,MIER1,PUF60,ATRX,TRAF3,CEP295,BAZ1B,ZC3HAV1,EIF5B,TAF4B,CEP290,MED14,ZBTB1,DTX3L,DCAF13,GIGYF2,RAD50,ZFP36,UPF2,RIF1,THOC1,PTEN,FAM172A,RLF,PIBF1,LACC1,INO80,BRWD1,GNL3,TCERG1,PHIP,ANKRD49,RALBP1,ARID4A,GLG1,SMARCA4,ADAM17,PHF14,DNAJC2,C…
GO:BP	regulation of macromolecule biosynthetic process	GO:0010556	0.009498292188234506	3598	426	127	17277	BRD8,NR3C1,TCF7L2,RAB1A,IQGAP1,ARID5B,ATM,RPS6KA5,SERPINE1,AKAP8,TGFB2,EGR2,TRAF5,CENPF,ATAD5,PRKDC,ETV6,MPHOSPH8,BHLHE41,JAK2,ACTN1,MLLT10,MIER1,PUF60,ATRX,TRAF3,BAZ1B,ZC3HAV1,EIF5B,TAF4B,CEP290,MED14,ZBTB1,DTX3L,DCAF13,GIGYF2,ZFP36,UPF2,RIF1,THOC1,FAM172A,RLF,PIBF1,LACC1,INO80,BRWD1,GNL3,TCERG1,PHIP,ANKRD49,ARID4A,GLG1,SMARCA4,ADAM17,PHF14,DNAJC2,SYK,NSRP1,LARP1B,RBM25,GTF2F1,THRAP3,SORL1,SETD5…
GO:BP	regulation of gene expression	GO:0010468	0.010691329591666267	3535	426	125	17277	BRD8,NR3C1,TCF7L2,RAB1A,IQGAP1,ARID5B,ATM,RPS6KA5,SERPINE1,AKAP8,TGFB2,EGR2,TRAF5,CENPF,ATAD5,PRKDC,ETV6,MPHOSPH8,BHLHE41,JAK2,ACTN1,MLLT10,MIER1,PUF60,ATRX,TRAF3,BAZ1B,ZC3HAV1,EIF5B,TAF4B,CEP290,MED14,ZBTB1,DTX3L,DCAF13,GIGYF2,ZFP36,UPF2,RIF1,THOC1,FAM172A,RLF,PIBF1,LACC1,INO80,BRWD1,GNL3,TCERG1,PHIP,ANKRD49,ARID4A,GLG1,SMARCA4,ADAM17,PHF14,DNAJC2,SYK,NSRP1,LARP1B,RBM25,GTF2F1,THRAP3,SORL1,SETD5…
GO:BP	mRNA catabolic process	GO:0006402	0.011862621002438001	169	392	15	17277	ATM,TRAF5,ZC3HAV1,GIGYF2,ZFP36,UPF2,LARP1B,THRAP3,ROCK1,AGO2,TNRC6B,FXR1,EDC3,SSB,PABPC4
GO:BP	meiotic spindle organization	GO:0000212	0.012310476958765386	14	166	4	17277	ASPM,ATRX,DCAF13,PTEN
GO:BP	response to lipid	GO:0033993	0.01301082589165241	416	57	9	17277	TFPI,NR3C1,TNFRSF11A,CXCL10,ATM,SERPINE1,GRAMD1B,AKAP8,TGFB2
GO:BP	regulation of cellular biosynthetic process	GO:0031326	0.01651365873814986	3673	426	128	17277	BRD8,NR3C1,TCF7L2,RAB1A,IQGAP1,ARID5B,ATM,RPS6KA5,SERPINE1,AKAP8,TGFB2,EGR2,TRAF5,CENPF,ATAD5,PRKDC,ETV6,MPHOSPH8,BHLHE41,JAK2,ACTN1,MLLT10,MIER1,PUF60,ATRX,TRAF3,BAZ1B,ZC3HAV1,EIF5B,TAF4B,CEP290,MED14,ZBTB1,DTX3L,DCAF13,GIGYF2,ZFP36,UPF2,RIF1,THOC1,FAM172A,RLF,PIBF1,LACC1,INO80,BRWD1,GNL3,TCERG1,PHIP,ANKRD49,ARID4A,PAOX,GLG1,SMARCA4,ADAM17,PHF14,DNAJC2,SYK,NSRP1,LARP1B,RBM25,GTF2F1,THRAP3,SORL1,…
GO:BP	regulation of DNA-templated transcription	GO:0006355	0.01729737466847218	2218	426	86	17277	BRD8,NR3C1,TCF7L2,ARID5B,ATM,RPS6KA5,TGFB2,EGR2,CENPF,PRKDC,ETV6,MPHOSPH8,BHLHE41,JAK2,ACTN1,MLLT10,MIER1,ATRX,TRAF3,BAZ1B,TAF4B,CEP290,MED14,ZBTB1,DTX3L,ZFP36,RIF1,THOC1,RLF,INO80,BRWD1,GNL3,TCERG1,PHIP,ANKRD49,ARID4A,SMARCA4,PHF14,DNAJC2,GTF2F1,THRAP3,SETD5,SP100,SUZ12,LARP7,AGO2,PIK3R1,CEBPZ,TOPORS,DNMT3A,CCAR1,NIPBL,TAF3,ASH1L,KDM5A,SMARCC1,MED1,PRPF6,ZNF394,MGA,ZNF609,ASXL2,NKAP,CCNH,KMT2E,I…
GO:BP	organelle assembly	GO:0070925	0.017467800900558935	636	413	34	17277	PLEC,RAB1A,ASPM,DIAPH3,ARHGAP35,CENPE,PRKDC,CEP135,CENPJ,CEP295,EIF5B,CEP290,DCAF13,CEP89,PTEN,PIBF1,INO80,CENPC,PRRC2C,DYNC1H1,CCDC66,CEP152,PCNT,SYNE2,CPLANE1,CYLD,FXR1,RB1CC1,OGFOD1,CEP350,CEP120,RDX,EIF5,EP400
GO:BP	cell cycle G1/S phase transition	GO:0044843	0.018085033422425373	128	410	13	17277	PRKDC,MTBP,GIGYF2,PTEN,INO80,ADAM17,CCNH,KMT2E,AIF1,BRD7,RPS6KB1,ANKRD17,APC
GO:BP	regulation of RNA biosynthetic process	GO:2001141	0.018860353145865812	2223	426	86	17277	BRD8,NR3C1,TCF7L2,ARID5B,ATM,RPS6KA5,TGFB2,EGR2,CENPF,PRKDC,ETV6,MPHOSPH8,BHLHE41,JAK2,ACTN1,MLLT10,MIER1,ATRX,TRAF3,BAZ1B,TAF4B,CEP290,MED14,ZBTB1,DTX3L,ZFP36,RIF1,THOC1,RLF,INO80,BRWD1,GNL3,TCERG1,PHIP,ANKRD49,ARID4A,SMARCA4,PHF14,DNAJC2,GTF2F1,THRAP3,SETD5,SP100,SUZ12,LARP7,AGO2,PIK3R1,CEBPZ,TOPORS,DNMT3A,CCAR1,NIPBL,TAF3,ASH1L,KDM5A,SMARCC1,MED1,PRPF6,ZNF394,MGA,ZNF609,ASXL2,NKAP,CCNH,KMT2E,I…
GO:BP	telomere maintenance	GO:0000723	0.01902338200129391	101	241	9	17277	ATM,PRKDC,ATRX,RAD50,RIF1,SMC6,INO80,GNL3,SP100
GO:BP	rRNA metabolic process	GO:0016072	0.02102812796678341	142	319	12	17277	UTP25,NVL,DDX52,PRKDC,PPAN,FTSJ3,DCAF13,SMARCA4,DIS3,PDCD11,MPHOSPH10,UTP20
GO:BP	telomere organization	GO:0032200	0.02231668775570772	103	241	9	17277	ATM,PRKDC,ATRX,RAD50,RIF1,SMC6,INO80,GNL3,SP100
GO:BP	positive regulation of neuron migration	GO:2001224	0.022907562233204982	9	324	4	17277	SHTN1,KIF20B,NIPBL,ZNF609
GO:BP	regulation of biosynthetic process	GO:0009889	0.023262519405151675	3698	426	128	17277	BRD8,NR3C1,TCF7L2,RAB1A,IQGAP1,ARID5B,ATM,RPS6KA5,SERPINE1,AKAP8,TGFB2,EGR2,TRAF5,CENPF,ATAD5,PRKDC,ETV6,MPHOSPH8,BHLHE41,JAK2,ACTN1,MLLT10,MIER1,PUF60,ATRX,TRAF3,BAZ1B,ZC3HAV1,EIF5B,TAF4B,CEP290,MED14,ZBTB1,DTX3L,DCAF13,GIGYF2,ZFP36,UPF2,RIF1,THOC1,FAM172A,RLF,PIBF1,LACC1,INO80,BRWD1,GNL3,TCERG1,PHIP,ANKRD49,ARID4A,PAOX,GLG1,SMARCA4,ADAM17,PHF14,DNAJC2,SYK,NSRP1,LARP1B,RBM25,GTF2F1,THRAP3,SORL1,…
GO:BP	DNA metabolic process	GO:0006259	0.023838968523584546	674	296	28	17277	POLN,BRD8,TCF7L2,ATM,ATAD5,PRKDC,POLD2,MPHOSPH8,ATRX,ZBTB1,DTX3L,BOD1L1,RAD50,RIF1,THOC1,RLF,SMC6,INO80,GNL3,ARID4A,DNAJC2,SP100,GIN1,RBBP6,ETAA1,RAD18,DNMT3A,FAAP100
GO:BP	microtubule-based process	GO:0007017	0.02445085095508105	652	340	30	17277	RAB1A,ASPM,DIAPH3,CENPE,CFAP251,AKAP9,CEP135,ATRX,CENPJ,CEP295,KIF20B,DCAF13,KIF13B,PTEN,PIBF1,INO80,DYNC1H1,CCDC66,CCNYL1,MAP7D3,CEP152,PCNT,ROCK1,SYNE2,ASH1L,CYLD,SON,KTN1,KIF15,PPP1R12A
GO:BP	extrinsic apoptotic signaling pathway	GO:0097191	0.02452973526346979	160	336	13	17277	TNFSF10,SERPINE1,TGFB2,PDIA3,TMC8,JAK2,PHIP,ZC3HC1,SP100,PIK3R1,CYLD,DNTTIP2,RB1CC1
GO:BP	organelle organization	GO:0006996	0.02496940426131369	2274	198	48	17277	PLEC,TCF7L2,LMNB1,RAB1A,TNFSF10,ATM,ASPM,THEM4,FMN1,SHTN1,AKAP8,DIAPH3,ARHGAP35,CENPE,EPB41,PRKDC,AKAP9,CEP135,MPHOSPH8,ZMYM4,ACTN1,MTBP,ATRX,CENPJ,CEP295,BAZ1B,EIF5B,CEP290,DCAF13,GIGYF2,CEP89,RAD50,RIF1,SMC4,SPART,PTEN,PIBF1,SMC6,INO80,BRWD1,CENPC,VPS13C,GNL3,PRRC2C,DYNC1H1,PHIP,CCDC66,RALBP1
GO:BP	positive regulation of chromosome organization	GO:2001252	0.02675961219363893	75	187	7	17277	ATM,MPHOSPH8,ATRX,RAD50,SMC4,INO80,GNL3
GO:BP	RNA catabolic process	GO:0006401	0.028426187067456577	204	392	16	17277	ATM,TRAF5,ZC3HAV1,GIGYF2,ZFP36,UPF2,LARP1B,THRAP3,ROCK1,AGO2,TNRC6B,DIS3,FXR1,EDC3,SSB,PABPC4
GO:BP	regulation of cellular metabolic process	GO:0031323	0.031021093916113168	4192	426	141	17277	BRD8,NR3C1,TCF7L2,RAB1A,IQGAP1,ARID5B,ATM,RPS6KA5,SERPINE1,AKAP8,TGFB2,EGR2,TRAF5,CENPF,ATAD5,PRKDC,ETV6,AKAP9,MPHOSPH8,BHLHE41,JAK2,ACTN1,MLLT10,MIER1,PUF60,ATRX,TRAF3,BAZ1B,ZC3HAV1,EIF5B,TAF4B,CEP290,MED14,ZBTB1,DTX3L,DCAF13,GIGYF2,RAD50,ZFP36,UPF2,RIF1,HERC1,THOC1,PTEN,FAM172A,RLF,PIBF1,LACC1,INO80,BRWD1,VPS13C,GNL3,TCERG1,PHIP,ANKRD49,RALBP1,ARID4A,PAOX,GLG1,SMARCA4,ADAM17,PHF14,DNAJC2,CCNYL1…
GO:BP	regulation of transcription by RNA polymerase II	GO:0006357	0.032619422105208566	1407	426	60	17277	BRD8,NR3C1,TCF7L2,ARID5B,ATM,RPS6KA5,EGR2,PRKDC,ETV6,BHLHE41,JAK2,MLLT10,ATRX,TAF4B,MED14,ZBTB1,ZFP36,RIF1,RLF,INO80,BRWD1,PHIP,ARID4A,SMARCA4,PHF14,GTF2F1,THRAP3,SP100,SUZ12,LARP7,AGO2,PIK3R1,CEBPZ,DNMT3A,NIPBL,TAF3,ASH1L,SMARCC1,MED1,PRPF6,ZNF609,ASXL2,NKAP,CCNH,PSMC5,PPP1R12A,CHD7,ZNF281,SPEN,BPTF,KLF7,CIR1,CDC5L,MTF1,BRD7,PTPN2,SETX,OGT,MED10,HIVEP1
GO:BP	signal transduction in response to DNA damage	GO:0042770	0.038460361580251616	130	371	12	17277	ATM,ATAD5,PRKDC,ATRX,DTX3L,GIGYF2,THOC1,CLSPN,SP100,ETAA1,TIPIN,CDC5L
GO:BP	nucleobase-containing compound biosynthetic process	GO:0034654	0.03965250355212578	2677	426	98	17277	POLN,NME1,BRD8,NR3C1,TCF7L2,ARID5B,ATM,RPS6KA5,TGFB2,CDC73,EGR2,CENPF,PRKDC,ETV6,POLD2,MPHOSPH8,BHLHE41,JAK2,ACTN1,MLLT10,MIER1,ATRX,TRAF3,BAZ1B,TAF4B,CEP290,MED14,ZBTB1,DTX3L,RAD50,ZFP36,RIF1,THOC1,RLF,INO80,BRWD1,GNL3,TCERG1,PHIP,ANKRD49,ARID4A,PCF11,SMARCA4,PHF14,DNAJC2,TCEA1,CRCP,GTF2F1,THRAP3,SETD5,SP100,ELOA,SUZ12,LARP7,AGO2,PIK3R1,CEBPZ,TOPORS,DNMT3A,CCAR1,NIPBL,TAF3,ASH1L,POLR2K,KDM5A,SMA…
GO:BP	microtubule cytoskeleton organization	GO:0000226	0.04269750538731235	430	258	19	17277	ASPM,DIAPH3,CENPE,AKAP9,CEP135,ATRX,CENPJ,CEP295,DCAF13,PTEN,PIBF1,INO80,DYNC1H1,CCDC66,MAP7D3,CEP152,PCNT,ROCK1,SYNE2
GO:CC	nucleoplasm	GO:0005654	9.70857e-07	2772	427	151	17694	POLN,BRD8,NR3C1,TCF7L2,LMNB1,UBN2,TNRC18,ATM,RPS6KA5,UTRN,AKAP8,NOC3L,CDC73,NVL,EGR2,CBLB,CENPF,EPB41,PRKDC,EHBP1,POLD2,MPHOSPH8,JAK2,MLLT10,MIER1,PUF60,ATRX,BAZ1B,KIF20B,TAF4B,FTSJ3,NOP14,PPIG,ZBTB1,DTX3L,DCAF13,BOD1L1,RIF1,SAFB2,SCAPER,SMC4,THOC1,PTEN,ANKRD11,SMC6,INO80,ARID4B,CENPC,GNL3,GOLGA4,ANKRD12,TCERG1,RALBP1,ACIN1,RARS1,SRRM1,ARID4A,YLPM1,CLSPN,PCF11,SMARCA4,ZC3HC1,PKN2,NOP58,NSRP1,RBM2…
GO:CC	nuclear lumen	GO:0031981	1.20199	3735	427	170	17694	NOM1,POLN,BRD8,NR3C1,TCF7L2,LMNB1,UBN2,UTP25,TNRC18,ATM,RPS6KA5,UTRN,AKAP8,NOC3L,CDC73,LOC119871705,NVL,EGR2,CBLB,LOC119870566,CENPF,EPB41,PRKDC,EHBP1,ETV6,PPAN,POLD2,MPHOSPH8,JAK2,MLLT10,MIER1,PUF60,ATRX,BAZ1B,KIF20B,TAF4B,FTSJ3,NOP14,PPIG,ZBTB1,DTX3L,DCAF13,BOD1L1,RIF1,SAFB2,SCAPER,SMC4,THOC1,PTEN,ANKRD11,SMC6,INO80,BRWD1,ARID4B,CENPC,GNL3,GOLGA4,ANKRD12,TCERG1,RALBP1,ACIN1,RARS1,SRRM1,ARID4A,Y…
GO:CC	intracellular organelle lumen	GO:0070013	0.813947	4007	427	176	17694	NOM1,POLN,BRD8,NR3C1,TCF7L2,LMNB1,UBN2,UTP25,TNRC18,ATM,RPS6KA5,UTRN,AKAP8,NOC3L,CDC73,LOC119871705,NVL,EGR2,CBLB,LOC119870566,PDIA3,CENPF,EPB41,PRKDC,EHBP1,ETV6,PPAN,POLD2,MPHOSPH8,JAK2,MLLT10,MIER1,PUF60,ATRX,BAZ1B,KIF20B,TAF4B,FTSJ3,NOP14,PPIG,ZBTB1,DTX3L,DCAF13,BOD1L1,RIF1,SAFB2,SCAPER,SMC4,THOC1,PTEN,ANKRD11,SMC6,INO80,BRWD1,ARID4B,CENPC,GNL3,GOLGA4,ANKRD12,TCERG1,RALBP1,ACIN1,RARS1,SRRM1,AR…
GO:CC	membrane-enclosed lumen	GO:0031974	0.813947	4007	427	176	17694	NOM1,POLN,BRD8,NR3C1,TCF7L2,LMNB1,UBN2,UTP25,TNRC18,ATM,RPS6KA5,UTRN,AKAP8,NOC3L,CDC73,LOC119871705,NVL,EGR2,CBLB,LOC119870566,PDIA3,CENPF,EPB41,PRKDC,EHBP1,ETV6,PPAN,POLD2,MPHOSPH8,JAK2,MLLT10,MIER1,PUF60,ATRX,BAZ1B,KIF20B,TAF4B,FTSJ3,NOP14,PPIG,ZBTB1,DTX3L,DCAF13,BOD1L1,RIF1,SAFB2,SCAPER,SMC4,THOC1,PTEN,ANKRD11,SMC6,INO80,BRWD1,ARID4B,CENPC,GNL3,GOLGA4,ANKRD12,TCERG1,RALBP1,ACIN1,RARS1,SRRM1,AR…
GO:CC	organelle lumen	GO:0043233	0.813947	4007	427	176	17694	NOM1,POLN,BRD8,NR3C1,TCF7L2,LMNB1,UBN2,UTP25,TNRC18,ATM,RPS6KA5,UTRN,AKAP8,NOC3L,CDC73,LOC119871705,NVL,EGR2,CBLB,LOC119870566,PDIA3,CENPF,EPB41,PRKDC,EHBP1,ETV6,PPAN,POLD2,MPHOSPH8,JAK2,MLLT10,MIER1,PUF60,ATRX,BAZ1B,KIF20B,TAF4B,FTSJ3,NOP14,PPIG,ZBTB1,DTX3L,DCAF13,BOD1L1,RIF1,SAFB2,SCAPER,SMC4,THOC1,PTEN,ANKRD11,SMC6,INO80,BRWD1,ARID4B,CENPC,GNL3,GOLGA4,ANKRD12,TCERG1,RALBP1,ACIN1,RARS1,SRRM1,AR…
GO:CC	nuclear body	GO:0016604	493.47	633	426	53	17694	NR3C1,NOC3L,EPB41,ATRX,PPIG,ZBTB1,SAFB2,SCAPER,SMC4,THOC1,PTEN,SMC6,INO80,CENPC,GNL3,RALBP1,SRRM1,YLPM1,PKN2,NOP58,NSRP1,RBM25,THRAP3,EFTUD2,SP100,TELO2,DBF4,SRSF11,PNISR,CWC22,RBBP6,DDX46,RAD18,TOPORS,SREK1,CWC25,SON,PRPF6,LUC7L3,KMT2E,PNN,CIR1,CDC5L,BCLAF1,COIL,PSPC1,NCBP3,SLTM,RBM39,GPATCH2,SETX,PRPF4B,HIVEP1
GO:CC	nuclear speck	GO:0016607	74716.6	282	425	32	17694	NR3C1,NOC3L,PPIG,SCAPER,SMC4,THOC1,SRRM1,YLPM1,NSRP1,RBM25,THRAP3,EFTUD2,SRSF11,PNISR,CWC22,RBBP6,DDX46,TOPORS,SREK1,CWC25,SON,PRPF6,LUC7L3,PNN,CIR1,CDC5L,BCLAF1,PSPC1,NCBP3,RBM39,GPATCH2,PRPF4B
GO:CC	microtubule cytoskeleton	GO:0015630	0.0000049915817501915775	976	412	52	17694	PLEC,NR3C1,SPECC1L,IQGAP1,STAU2,ATM,ASPM,HMMR,SHTN1,DIAPH3,ARHGAP35,TRAF5,CENPE,CENPF,EPB41,AKAP9,CEP135,CENPJ,CEP295,KIF20B,CEP290,DCAF13,CEP89,KIF13B,RIF1,SKP1,PIBF1,SMC6,DYNC1H1,CCDC66,GLG1,PKN2,MAP7D3,CEP152,PCNT,RBBP6,GNAI2,RAD18,TOPORS,RABL6,CYLD,KIF15,ITSN2,PIK3R5,PPP1R12A,CEP350,CIR1,LYST,CEP120,MACF1,APC,RBM39
GO:CC	nucleus	GO:0005634	0.0000070270104954052065	7434	427	235	17694	NOM1,POLN,LOC119864069,LOC119866970,BRD8,NR3C1,TCF7L2,LMNB1,UBN2,IQGAP1,SYCP2,UTP25,LOC119871388,TNRC18,ATM,ASPM,RPS6KA5,UTRN,FMN1,AKAP8,NOC3L,CDC73,DIAPH3,LOC119871705,NVL,EGR2,CBLB,LOC119870566,CENPE,CENPF,EPB41,ATAD5,PRKDC,EHBP1,ETV6,PPAN,TMC8,POLD2,MPHOSPH8,JAK2,MLLT10,MIER1,PUF60,ATRX,BAZ1B,KIF20B,TAF4B,RAD54L2,FTSJ3,CEP290,NOP14,MED14,PPIG,ZBTB1,DTX3L,DCAF13,BOD1L1,RAD50,ZFP36,UPF2,ZFC3H1,R…
GO:CC	intracellular non-membrane-bounded organelle	GO:0043232	0.000015838297460080683	4303	422	151	17694	NOM1,PLEC,BRD8,NR3C1,TCF7L2,LMNB1,SPECC1L,IQGAP1,SYCP2,UTP25,STAU2,ATM,ASPM,HMMR,FMN1,SHTN1,AKAP8,NOC3L,DIAPH3,LOC119871705,NVL,LOC119870566,ARHGAP35,TRAF5,CENPE,LOC607206,CENPF,EPB41,ATAD5,PRKDC,ETV6,RAB8A,PPAN,POLD2,AKAP9,CEP135,MPHOSPH8,JAK2,ACTN1,MTBP,ATRX,CENPJ,CEP295,BAZ1B,KIF20B,TAF4B,FTSJ3,CEP290,NOP14,DCAF13,GIGYF2,CEP89,RAD50,ZFP36,UPF2,KIF13B,RIF1,SMC4,SKP1,SPART,THOC2,IMP3,THOC1,PIBF1…
GO:CC	non-membrane-bounded organelle	GO:0043228	0.00001608822940906571	4304	422	151	17694	NOM1,PLEC,BRD8,NR3C1,TCF7L2,LMNB1,SPECC1L,IQGAP1,SYCP2,UTP25,STAU2,ATM,ASPM,HMMR,FMN1,SHTN1,AKAP8,NOC3L,DIAPH3,LOC119871705,NVL,LOC119870566,ARHGAP35,TRAF5,CENPE,LOC607206,CENPF,EPB41,ATAD5,PRKDC,ETV6,RAB8A,PPAN,POLD2,AKAP9,CEP135,MPHOSPH8,JAK2,ACTN1,MTBP,ATRX,CENPJ,CEP295,BAZ1B,KIF20B,TAF4B,FTSJ3,CEP290,NOP14,DCAF13,GIGYF2,CEP89,RAD50,ZFP36,UPF2,KIF13B,RIF1,SMC4,SKP1,SPART,THOC2,IMP3,THOC1,PIBF1…
GO:CC	microtubule organizing center	GO:0005815	0.00001977488121203287	602	412	37	17694	NR3C1,ATM,HMMR,DIAPH3,ARHGAP35,TRAF5,CENPF,AKAP9,CEP135,CENPJ,CEP295,KIF20B,CEP290,DCAF13,CEP89,SKP1,PIBF1,DYNC1H1,CCDC66,GLG1,PKN2,CEP152,PCNT,RBBP6,GNAI2,RAD18,TOPORS,RABL6,CYLD,ITSN2,PIK3R5,PPP1R12A,CEP350,CIR1,CEP120,APC,RBM39
GO:CC	midbody	GO:0030496	0.00003577604992711301	140	306	14	17694	IQGAP1,ASPM,CENPE,CENPF,MITD1,KIF20B,SPART,CENPC,GNL3,CCDC66,PKN2,HSP90B1,GNAI2,CYLD
GO:CC	spindle	GO:0005819	0.00008804924262530991	258	152	13	17694	NR3C1,SPECC1L,ATM,ASPM,HMMR,DIAPH3,CENPE,CENPF,EPB41,CEP295,KIF20B,CEP89,RIF1
GO:CC	centrosome	GO:0005813	0.0001114594924168246	513	412	32	17694	NR3C1,ATM,HMMR,TRAF5,CENPF,AKAP9,CEP135,CEP295,KIF20B,CEP290,DCAF13,CEP89,SKP1,PIBF1,DYNC1H1,CCDC66,PKN2,CEP152,PCNT,RBBP6,GNAI2,RAD18,RABL6,CYLD,ITSN2,PIK3R5,PPP1R12A,CEP350,CIR1,CEP120,APC,RBM39
GO:CC	cytosol	GO:0005829	0.00024412223902824202	2539	427	98	17694	PLEC,NR3C1,PLCE1,TNFRSF11A,TNRC18,THEM4,HMMR,CBLB,TRAF5,CENPF,EPB41,EHBP1,ETV6,APBB1IP,CIP2A,MPHOSPH8,BTF3,CEP295,ZC3HAV1,KIF20B,CEP290,PPIG,LGALS8,DTX3L,DCAF13,GIGYF2,CEP89,ZFP36,UPF2,SCAPER,SMC4,SKP1,SPART,PTEN,ANKRD11,MTR,INO80,BRWD1,ARID4B,VPS13C,ANKRD12,PRRC2C,CCDC66,ACIN1,RARS1,ADAM17,DNAJC2,PKN2,NOP58,SYK,HSP90B1,PCNT,EFTUD2,TELO2,PNISR,CWC22,LARP7,AGO2,PIK3R1,GNAI2,SNRNP48,CHD9,NMT1,ETAA1…
GO:CC	chromosomal region	GO:0098687	0.00028911649723026056	235	185	13	17694	ATM,CENPE,CENPF,MTBP,ATRX,BAZ1B,RAD50,RIF1,SMC4,THOC2,THOC1,SMC6,CENPC
GO:CC	chromosome	GO:0005694	0.00031536291153679675	969	422	48	17694	BRD8,TCF7L2,SYCP2,ATM,AKAP8,CENPE,CENPF,ATAD5,PRKDC,POLD2,MPHOSPH8,MTBP,ATRX,BAZ1B,FTSJ3,RAD50,RIF1,SMC4,THOC2,THOC1,SMC6,INO80,CENPC,GNL3,SMARCA4,SETD5,SUZ12,CHD1,ETAA1,RAD18,DNMT3A,NIPBL,FAAP100,SMARCC1,KMT2E,PPP1R12A,TIPIN,MUS81,BPTF,SLX1A,ANP32E,CDC5L,ANKRD17,APC,SETX,OGT,RFC1,DDX21
GO:CC	cytoskeleton	GO:0005856	0.0006906912794174451	1586	261	47	17694	PLEC,NR3C1,LMNB1,SPECC1L,IQGAP1,STAU2,ATM,ASPM,HMMR,FMN1,SHTN1,DIAPH3,ARHGAP35,TRAF5,CENPE,LOC607206,CENPF,EPB41,RAB8A,AKAP9,CEP135,JAK2,ACTN1,CENPJ,CEP295,KIF20B,CEP290,DCAF13,CEP89,KIF13B,RIF1,SKP1,PIBF1,SMC6,DYNC1H1,CCDC66,GLG1,ADAM17,LOC102152706,PKN2,MAP7D3,CEP152,PCNT,ROCK1,SYNE2,RBBP6,GNAI2
GO:CC	catalytic complex	GO:1902494	0.002850255525456957	1291	425	56	17694	BRD8,ATM,CYBB,CDC73,NVL,ATAD5,PRKDC,POLD2,SPCS2,BAZ1B,TAF4B,DCAF13,BOD1L1,ZFC3H1,SKP1,MLEC,SMC6,INO80,DYNC1H1,RARS1,SRRM1,SMARCA4,CRCP,GTF2F1,EFTUD2,CWC22,SUZ12,AGO2,PIK3R1,DIS3,TOPORS,DNMT3A,TAF3,CWC25,DNTTIP2,SMARCC1,PRPF6,MGA,PIK3R5,CCNH,RB1CC1,PSMC5,PPP1R12A,PNN,MUS81,BPTF,CRNKL1,ANP32E,CDC5L,PSMD11,APC,EP400,OGT,RFC1,DDX21,PRPF4B
GO:CC	polymeric cytoskeletal fiber	GO:0099513	0.003319105929089617	426	76	10	17694	PLEC,LMNB1,IQGAP1,STAU2,ASPM,FMN1,SHTN1,DIAPH3,CENPE,LOC607206
GO:CC	condensed chromosome	GO:0000793	0.006820715914404651	187	185	10	17694	AKAP8,CENPE,CENPF,MTBP,ATRX,BAZ1B,RIF1,SMC4,SMC6,CENPC
GO:CC	chromosome, telomeric region	GO:0000781	0.006953292317586604	87	179	7	17694	ATM,ATRX,RAD50,RIF1,THOC2,THOC1,SMC6
GO:CC	catalytic step 2 spliceosome	GO:0071013	0.016940207123481366	58	425	8	17694	SRRM1,EFTUD2,CWC22,PRPF6,PNN,CRNKL1,CDC5L,PRPF4B
GO:CC	centriole	GO:0005814	0.025707732110721835	106	385	10	17694	CEP135,CENPJ,CEP295,CEP290,CEP89,CEP152,PCNT,TOPORS,CEP350,CEP120
GO:CC	preribosome	GO:0030684	0.026774039351637007	61	319	7	17694	PRKDC,FTSJ3,NOP14,NOP58,UTP3,MPHOSPH10,UTP20
GO:CC	supramolecular fiber	GO:0099512	0.03666837003888237	567	76	10	17694	PLEC,LMNB1,IQGAP1,STAU2,ASPM,FMN1,SHTN1,DIAPH3,CENPE,LOC607206
GO:CC	supramolecular complex	GO:0099080	0.03789070494730667	802	150	18	17694	PLEC,LMNB1,IQGAP1,STAU2,ASPM,FMN1,SHTN1,DIAPH3,CENPE,LOC607206,CENPF,ACTN1,MTBP,CEP295,GIGYF2,ZFP36,UPF2,KIF13B
GO:CC	supramolecular polymer	GO:0099081	0.040510589379602016	574	76	10	17694	PLEC,LMNB1,IQGAP1,STAU2,ASPM,FMN1,SHTN1,DIAPH3,CENPE,LOC607206
GO:CC	pronucleus	GO:0045120	0.04070206189831937	13	152	3	17694	AKAP8,CENPF,RIF1

## Sheet: 2avs1 down
g:Pofiler 08.09.24, 2a vs. 1 down
source	term_name	term_id	adjusted_p_value	term_size	query_size	intersection_size	effective_domain_size	intersections
GO:BP	negative regulation of cilium assembly	GO:1902018	0.022922959310437373	16	169	4	17277	YAP1,TBC1D7,AKT1,LPAR1
GO:BP	regulation of cilium assembly	GO:1902017	0.030045051571250942	60	46	4	17277	IFT20,YAP1,RAB11A,TBC1D7
GO:BP	post-Golgi vesicle-mediated transport	GO:0006892	0.0309680031550914	56	173	6	17277	AP3S1,PREPL,DOP1B,PAM16,RP2,GOLGA7
GO:BP	intracellular transport	GO:0046907	0.038369007000761575	862	189	24	17277	IFT20,AP3S1,COPA,SNX4,MTCH1,TMED2,RAB11A,BLOC1S4,TRAM1,ARFIP1,UBE2J1,PREPL,CTTN,AP1M1,DOP1B,PAM16,SEC24D,AKT1,PIK3R2,HTATIP2,MREG,TMEM30B,HSPB1,GAS6
GO:BP	localization within membrane	GO:0051668	0.04272477230247245	444	48	8	17277	IFT20,SNX4,MTCH1,TMED2,RAB11A,TRAM1,RAP1A,EMC4
GO:CC	organelle subcompartment	GO:0031984	0.006172331349983817	719	118	16	17694	TMED2,RAB11A,ALG6,TRAM1,EMC4,ARFIP1,PIGH,UBE2J1,SCAMP2,PREPL,MBLAC2,SPCS1,UBQLN4,PAM16,EBPL,SEC24D
GO:CC	endomembrane system	GO:0012505	0.0202729903197279	2571	111	32	17694	TOR1AIP1,IFT20,ZDHHC12,COPA,SNX4,TMED2,SHISA5,RAB5B,RAB11A,ALG6,TRAM1,EMC4,MARCHF2,ARFIP1,SNAP23,SYAP1,PIGH,TMEM167B,UBE2J1,TNKS2,SCAMP2,PREPL,MBLAC2,ABHD2,CTTN,SPCS1,UBQLN4,AP1M1,DOP1B,PAM16,RP2,EBPL
GO:CC	organelle membrane	GO:0031090	0.02992113148945304	1918	111	26	17694	TOR1AIP1,NDUFA2,COPA,SNX4,TMED2,RAB11A,ALG6,TRAM1,TBC1D7,EMC4,MARCHF2,ARFIP1,SLC25A17,PIGH,TMEM167B,UBE2J1,SCAMP2,SFXN3,MBLAC2,SH3BP5,SPCS1,UBQLN4,AP1M1,DOP1B,PAM16,EBPL
GO:CC	trans-Golgi network membrane	GO:0032588	0.04071762823578753	26	71	3	17694	RAB11A,ARFIP1,SCAMP2

## Sheet: 2avs1 total
g:Pofiler 08.09.24, 2a vs. 1 total
source	term_name	term_id	adjusted_p_value	term_size	query_size	intersection_size	effective_domain_size	intersections
GO:MF	ATP-dependent activity	GO:0140657	0.0000030019337071733427	530	423	38	16834	ATP13A3,DDX59,NVL,HYOU1,CENPE,DDX52,ATAD5,UBA6,ATRX,KIF20B,RAD54L2,RAD50,KIF13B,SMC4,SMC6,INO80,DYNC1H1,RALBP1,SMARCA4,HSP90B1,CHD1,CHD9,DDX46,DDX55,DDX6,DDX27,HELZ,KIF15,PSMC5,CHD7,BPTF,CHD2,YTHDC2,ABCF1,SETX,RFC1,DDX21,ATAD2B
GO:MF	histone binding	GO:0042393	0.000036150504392049684	150	598	21	16834	MPHOSPH8,JAK2,MLLT10,ATRX,BAZ1B,DTX3L,PHIP,SMARCA4,PHF14,DNAJC2,CHD1,KDM5A,KMT2E,ANP32E,CHD2,BRD7,ATAD2B,CBX4,DPF2,BCAS3,PYGO1
GO:MF	histone kinase activity	GO:0035173	0.00010950240025815902	20	120	5	16834	ATM,RPS6KA5,PRKDC,JAK2,BAZ1B
GO:MF	ATP-dependent chromatin remodeler activity	GO:0140658	0.00036297566516611346	35	376	8	16834	ATRX,RAD54L2,INO80,SMARCA4,CHD1,CHD9,CHD7,CHD2
GO:MF	catalytic activity, acting on a nucleic acid	GO:0140640	0.00042913346125110643	493	422	32	16834	POLN,DDX59,DDX52,ATAD5,ATRX,RAD54L2,FTSJ3,RAD50,INO80,RARS1,SMARCA4,AGO2,CHD1,CHD9,DDX46,DIS3,DNMT3A,DDX55,NIPBL,DDX6,DDX27,POLR2K,HELZ,CHD7,MUS81,BPTF,SLX1A,CHD2,YTHDC2,SETX,RFC1,DDX21
GO:MF	histone H2AX kinase activity	GO:0141003	0.0006389881414124479	4	120	3	16834	ATM,PRKDC,BAZ1B
GO:MF	enzyme binding	GO:0019899	0.0009107321958406688	1358	260	44	16834	PPP1R27,NR3C1,TCF7L2,LMNB1,PLCE1,IQGAP1,SERPINE1,UTRN,AKAP8,DIAPH3,EGR2,TRAF5,BHLHE41,JAK2,MIER1,TRAF3,NOP14,ZBTB1,DTX3L,ZFP36,SPART,PTEN,MLEC,SMC6,GOLGA4,TCERG1,RALBP1,PCF11,SMARCA4,ZC3HC1,PKN2,CCNYL1,NOP58,SYK,HSP90B1,GTF2F1,CEP152,SORL1,SP100,TELO2,ROCK1,AGO2,PIK3R1,RBBP6
GO:MF	helicase activity	GO:0004386	0.0012564253543697237	124	422	14	16834	DDX59,DDX52,RAD50,SMARCA4,CHD9,DDX46,DDX55,DDX6,DDX27,HELZ,CHD7,YTHDC2,SETX,DDX21
GO:MF	catalytic activity, acting on DNA	GO:0140097	0.0021784191004433143	187	376	16	16834	POLN,ATAD5,ATRX,RAD54L2,RAD50,INO80,SMARCA4,CHD1,CHD9,DNMT3A,NIPBL,CHD7,MUS81,BPTF,SLX1A,CHD2
GO:MF	modification-dependent protein binding	GO:0140030	0.0035856832334607825	140	526	16	16834	MPHOSPH8,ATRX,ZBTB1,PHIP,SMARCA4,DNAJC2,CHD1,RAD18,KDM5A,KMT2E,PHF20L1,BRD7,ATAD2B,CBX4,DPF2,UBQLN4
GO:MF	ATP-dependent activity, acting on DNA	GO:0008094	0.005040127034986217	104	421	12	16834	ATAD5,ATRX,RAD54L2,RAD50,INO80,SMARCA4,CHD1,CHD9,CHD7,BPTF,CHD2,RFC1
GO:MF	DNA-dependent protein kinase activity	GO:0004677	0.010654359438476731	2	82	2	16834	ATM,PRKDC
GO:MF	mRNA binding	GO:0003729	0.028275365043968912	195	397	15	16834	ZFP36,GNL3,PCF11,LUC7L,NSRP1,RBM25,AGO2,LUC7L3,FXR1,EDC3,NKAP,ILF3,SSB,PABPC4,NCBP3
GO:MF	protein-containing complex binding	GO:0044877	0.029336442299289986	1015	420	46	16834	PLEC,TNRC18,ATM,UTRN,NVL,EGR2,CENPF,DLA-DRA,MPHOSPH8,ACTN1,MLLT10,ATRX,LGALS8,ZFP36,ICAM3,SMC4,PTEN,CLSPN,ADAM17,DNAJC2,NOP58,SYK,GTF2F1,SORL1,TELO2,SUZ12,GNAI2,RAD18,DNMT3A,NIPBL,MTIF3,ASH1L,SMARCC1,MED1,PRPF6,ZNF609,NKAP,CHD7,AIF1,CIR1,GCN1,ANKRD17,TSSC4,APC,EP400,OGT
GO:MF	histone H2AXS139 kinase activity	GO:0035979	0.03186180113445612	3	82	2	16834	ATM,PRKDC
GO:MF	proline-rich region binding	GO:0070064	0.043424439410238276	10	453	4	16834	GIGYF2,TCERG1,CYLD,YAP1
GO:MF	chromo shadow domain binding	GO:0070087	0.0447194800972317	6	291	3	16834	ATRX,SP100,NIPBL
GO:MF	acetylation-dependent protein binding	GO:0140033	0.0465082730943092	17	498	5	16834	PHIP,SMARCA4,BRD7,ATAD2B,DPF2
GO:MF	lysine-acetylated histone binding	GO:0070577	0.0465082730943092	17	498	5	16834	PHIP,SMARCA4,BRD7,ATAD2B,DPF2
GO:BP	cell cycle process	GO:0022402	0.0000028915519678576297	808	410	49	17277	PLEC,ATM,ASPM,AKAP8,DIAPH3,CENPE,CENPF,ATAD5,PRKDC,CEP135,MTBP,MITD1,ATRX,CENPJ,CEP295,BAZ1B,KIF20B,DTX3L,DCAF13,GIGYF2,SMC4,THOC1,PTEN,PIBF1,SMC6,INO80,CENPC,DYNC1H1,CLSPN,ADAM17,PKN2,CEP152,PCNT,ETAA1,RAD18,NIPBL,SON,MED1,CCNH,KMT2E,PPP1R12A,TIPIN,AIF1,CDC5L,CEP120,BRD7,RPS6KB1,ANKRD17,APC
GO:BP	positive regulation of nucleobase-containing compound metabolic process	GO:0045935	0.00000482668838658017	1367	381	65	17277	BRD8,NR3C1,TCF7L2,ARID5B,ATM,RPS6KA5,TGFB2,EGR2,ATAD5,PRKDC,ETV6,JAK2,ACTN1,MLLT10,ATRX,BAZ1B,ZC3HAV1,TAF4B,CEP290,DTX3L,GIGYF2,RAD50,ZFP36,RIF1,THOC1,INO80,GNL3,PHIP,ANKRD49,ARID4A,SMARCA4,DNAJC2,GTF2F1,THRAP3,SP100,ROCK1,LARP7,AGO2,PIK3R1,TNRC6B,CEBPZ,TOPORS,CCAR1,NIPBL,TAF3,ASH1L,KDM5A,SMARCC1,MED1,PRPF6,MGA,ZNF609,ASXL2,FXR1,KMT2E,ILF3,PPP1R12A,CHD7,ZNF281,BPTF,KLF7,SLX1A,CDC5L,MTF1,BCLAF1
GO:BP	positive regulation of RNA metabolic process	GO:0051254	0.000005595868436049666	1247	381	61	17277	BRD8,NR3C1,TCF7L2,ARID5B,ATM,RPS6KA5,TGFB2,EGR2,PRKDC,ETV6,JAK2,ACTN1,MLLT10,ATRX,BAZ1B,ZC3HAV1,TAF4B,CEP290,DTX3L,GIGYF2,ZFP36,THOC1,INO80,GNL3,PHIP,ANKRD49,ARID4A,SMARCA4,DNAJC2,GTF2F1,THRAP3,SP100,ROCK1,LARP7,AGO2,PIK3R1,TNRC6B,CEBPZ,TOPORS,CCAR1,NIPBL,TAF3,ASH1L,KDM5A,SMARCC1,MED1,PRPF6,MGA,ZNF609,ASXL2,FXR1,KMT2E,ILF3,PPP1R12A,CHD7,ZNF281,BPTF,KLF7,CDC5L,MTF1,BCLAF1
GO:BP	positive regulation of cellular biosynthetic process	GO:0031328	0.000011821765595066389	1775	426	83	17277	BRD8,NR3C1,TCF7L2,RAB1A,ARID5B,ATM,RPS6KA5,SERPINE1,TGFB2,EGR2,TRAF5,ATAD5,PRKDC,ETV6,JAK2,ACTN1,MLLT10,ATRX,TRAF3,BAZ1B,TAF4B,CEP290,DTX3L,ZFP36,RIF1,THOC1,PIBF1,LACC1,INO80,GNL3,PHIP,ANKRD49,ARID4A,PAOX,SMARCA4,ADAM17,DNAJC2,SYK,LARP1B,GTF2F1,THRAP3,SORL1,SP100,ROCK1,LARP7,AGO2,PIK3R1,CEBPZ,TOPORS,CCAR1,B2M,NIPBL,TAF3,ASH1L,KDM5A,SMARCC1,MED1,PRPF6,MGA,ZNF609,ASXL2,FXR1,KMT2E,ILF3,PPP1R12A,CHD7…
GO:BP	positive regulation of nitrogen compound metabolic process	GO:0051173	0.000014891633703312752	1845	426	85	17277	BRD8,NR3C1,TCF7L2,RAB1A,ARID5B,ATM,RPS6KA5,TMTC3,TGFB2,EGR2,CBLB,ATAD5,PRKDC,ETV6,AKAP9,JAK2,ACTN1,MLLT10,ATRX,CEP295,BAZ1B,ZC3HAV1,TAF4B,CEP290,DTX3L,GIGYF2,RAD50,ZFP36,RIF1,THOC1,PTEN,PIBF1,INO80,GNL3,PHIP,ANKRD49,RALBP1,ARID4A,PAOX,SMARCA4,DNAJC2,SYK,GTF2F1,THRAP3,SORL1,SP100,ROCK1,LARP7,AGO2,PIK3R1,TNRC6B,CEBPZ,TOPORS,CCAR1,NIPBL,TAF3,ASH1L,KDM5A,SMARCC1,MED1,PRPF6,MGA,ZNF609,ASXL2,FXR1,KMT2E…
GO:BP	positive regulation of macromolecule metabolic process	GO:0010604	0.000016352332731126473	2160	426	95	17277	BRD8,NR3C1,TCF7L2,RAB1A,ARID5B,ATM,RPS6KA5,SERPINE1,TMTC3,TGFB2,EGR2,CBLB,TRAF5,ATAD5,PRKDC,ETV6,AKAP9,JAK2,ACTN1,MLLT10,ATRX,TRAF3,CEP295,BAZ1B,ZC3HAV1,TAF4B,CEP290,DTX3L,GIGYF2,RAD50,ZFP36,RIF1,THOC1,PTEN,PIBF1,LACC1,INO80,GNL3,PHIP,ANKRD49,RALBP1,ARID4A,SMARCA4,ADAM17,DNAJC2,SYK,LARP1B,GTF2F1,THRAP3,SORL1,SP100,ROCK1,LARP7,AGO2,PIK3R1,TNRC6B,CEBPZ,TOPORS,CCAR1,B2M,NIPBL,TAF3,ASH1L,KDM5A,SMARCC…
GO:BP	positive regulation of macromolecule biosynthetic process	GO:0010557	0.000016441183087573308	1727	426	81	17277	BRD8,NR3C1,TCF7L2,RAB1A,ARID5B,ATM,RPS6KA5,SERPINE1,TGFB2,EGR2,TRAF5,ATAD5,PRKDC,ETV6,JAK2,ACTN1,MLLT10,ATRX,TRAF3,BAZ1B,TAF4B,CEP290,DTX3L,ZFP36,RIF1,THOC1,PIBF1,LACC1,INO80,GNL3,PHIP,ANKRD49,ARID4A,SMARCA4,ADAM17,DNAJC2,SYK,LARP1B,GTF2F1,THRAP3,SORL1,SP100,ROCK1,LARP7,AGO2,PIK3R1,CEBPZ,TOPORS,CCAR1,B2M,NIPBL,TAF3,ASH1L,KDM5A,SMARCC1,MED1,PRPF6,MGA,ZNF609,ASXL2,FXR1,KMT2E,ILF3,PPP1R12A,CHD7,ZNF2…
GO:BP	positive regulation of biosynthetic process	GO:0009891	0.000016971552143944905	1789	426	83	17277	BRD8,NR3C1,TCF7L2,RAB1A,ARID5B,ATM,RPS6KA5,SERPINE1,TGFB2,EGR2,TRAF5,ATAD5,PRKDC,ETV6,JAK2,ACTN1,MLLT10,ATRX,TRAF3,BAZ1B,TAF4B,CEP290,DTX3L,ZFP36,RIF1,THOC1,PIBF1,LACC1,INO80,GNL3,PHIP,ANKRD49,ARID4A,PAOX,SMARCA4,ADAM17,DNAJC2,SYK,LARP1B,GTF2F1,THRAP3,SORL1,SP100,ROCK1,LARP7,AGO2,PIK3R1,CEBPZ,TOPORS,CCAR1,B2M,NIPBL,TAF3,ASH1L,KDM5A,SMARCC1,MED1,PRPF6,MGA,ZNF609,ASXL2,FXR1,KMT2E,ILF3,PPP1R12A,CHD7…
GO:BP	cell cycle	GO:0007049	0.00001712160888519758	1077	399	56	17277	PLEC,BRD8,SPECC1L,IQGAP1,ATM,ASPM,AKAP8,DIAPH3,CENPE,CENPF,EPB41,ATAD5,PRKDC,CEP135,MTBP,MITD1,ATRX,CENPJ,CEP295,BAZ1B,KIF20B,DTX3L,DCAF13,GIGYF2,RIF1,SMC4,THOC1,PTEN,PIBF1,SMC6,INO80,CENPC,DYNC1H1,CLSPN,ADAM17,PKN2,CCNYL1,CEP152,PCNT,ETAA1,RAD18,NIPBL,MKI67,CYLD,SON,MED1,CCNH,KMT2E,PPP1R12A,TIPIN,AIF1,CDC5L,CEP120,BRD7,RPS6KB1,ANKRD17
GO:BP	regulation of nitrogen compound metabolic process	GO:0051171	0.00002054097101636394	3392	426	132	17277	BRD8,NR3C1,TCF7L2,RAB1A,ARID5B,ATM,RPS6KA5,SERPINE1,TMTC3,TGFB2,EGR2,CBLB,TRAF5,CENPF,ATAD5,PRKDC,ETV6,AKAP9,MPHOSPH8,BHLHE41,JAK2,ACTN1,MTBP,MLLT10,MIER1,PUF60,ATRX,TRAF3,CEP295,BAZ1B,ZC3HAV1,EIF5B,TAF4B,CEP290,MED14,ZBTB1,DTX3L,GIGYF2,RAD50,ZFP36,RIF1,THOC1,PTEN,FAM172A,RLF,PIBF1,LACC1,INO80,BRWD1,GNL3,TCERG1,PHIP,ANKRD49,RALBP1,ARID4A,PAOX,GLG1,SMARCA4,PHF14,DNAJC2,CCNYL1,SYK,NSRP1,LARP1B,RBM2…
GO:BP	regulation of cell cycle process	GO:0010564	0.000027434910273211512	457	410	33	17277	ATM,CENPE,CENPF,ATAD5,PRKDC,MTBP,ATRX,CEP295,BAZ1B,KIF20B,DTX3L,GIGYF2,SMC4,THOC1,PTEN,SMC6,INO80,DYNC1H1,CLSPN,ADAM17,PKN2,ETAA1,RAD18,MED1,CCNH,KMT2E,TIPIN,AIF1,CDC5L,CEP120,BRD7,ANKRD17,APC
GO:BP	non-membrane-bounded organelle assembly	GO:0140694	0.00003233654276379867	246	193	16	17277	PLEC,ASPM,DIAPH3,CENPE,PRKDC,CEP135,CENPJ,CEP295,EIF5B,DCAF13,PTEN,PIBF1,INO80,CENPC,PRRC2C,DYNC1H1
GO:BP	positive regulation of cellular metabolic process	GO:0031325	0.00004041417574784524	2136	426	93	17277	BRD8,NR3C1,TCF7L2,RAB1A,ARID5B,ATM,RPS6KA5,SERPINE1,TGFB2,EGR2,TRAF5,ATAD5,PRKDC,ETV6,AKAP9,JAK2,ACTN1,MLLT10,ATRX,TRAF3,BAZ1B,ZC3HAV1,TAF4B,CEP290,DTX3L,GIGYF2,RAD50,ZFP36,RIF1,THOC1,PIBF1,LACC1,INO80,GNL3,PHIP,ANKRD49,RALBP1,ARID4A,PAOX,SMARCA4,ADAM17,DNAJC2,SYK,LARP1B,GTF2F1,THRAP3,SORL1,SP100,ROCK1,LARP7,AGO2,PIK3R1,TNRC6B,CEBPZ,TOPORS,CCAR1,B2M,NIPBL,TAF3,ASH1L,KDM5A,SMARCC1,MED1,PRPF6,MGA,Z…
GO:BP	positive regulation of metabolic process	GO:0009893	0.00006015111063104563	2346	426	99	17277	BRD8,NR3C1,TCF7L2,RAB1A,ARID5B,ATM,RPS6KA5,SERPINE1,TMTC3,TGFB2,EGR2,CBLB,TRAF5,ATAD5,PRKDC,ETV6,AKAP9,JAK2,ACTN1,MLLT10,ATRX,TRAF3,CEP295,BAZ1B,ZC3HAV1,TAF4B,CEP290,DTX3L,GIGYF2,RAD50,ZFP36,RIF1,THOC1,PTEN,PIBF1,LACC1,INO80,GNL3,DYNC1H1,PHIP,ANKRD49,RALBP1,ARID4A,PAOX,SMARCA4,ADAM17,DNAJC2,SYK,LARP1B,GTF2F1,THRAP3,SORL1,SP100,ROCK1,LARP7,AGO2,PIK3R1,TNRC6B,CEBPZ,TOPORS,CCAR1,B2M,NIPBL,TAF3,ASH1L…
GO:BP	positive regulation of cellular process	GO:0048522	0.00008509200851113048	3674	457	146	17277	BRD8,NR3C1,TCF7L2,RAB1A,PLCE1,TNFRSF11A,IQGAP1,ARID5B,CXCL10,TNFSF10,ATM,ASPM,RPS6KA5,SERPINE1,UTRN,FMN1,SHTN1,TGFB2,EGR2,PDIA3,ARHGAP35,TRAF5,DLA-DRA,EPB41,ATAD5,PRKDC,ETV6,APBB1IP,AKAP9,CEP135,MPHOSPH8,JAK2,ACTN1,USP34,MTBP,MLLT10,ATRX,TRAF3,CENPJ,CEP295,BAZ1B,ZC3HAV1,KIF20B,TAF4B,CEP290,ZBTB1,DTX3L,GIGYF2,RAD50,ZFP36,RIF1,SMC4,THOC1,PIBF1,LACC1,SMC6,INO80,GNL3,GOLGA4,IL18RAP,DYNC1H1,PHIP,ANKRD…
GO:BP	positive regulation of DNA-templated transcription	GO:0045893	0.00008572792897458149	1152	381	55	17277	BRD8,NR3C1,TCF7L2,ARID5B,ATM,RPS6KA5,TGFB2,EGR2,PRKDC,ETV6,JAK2,ACTN1,MLLT10,ATRX,BAZ1B,TAF4B,CEP290,DTX3L,THOC1,INO80,GNL3,PHIP,ANKRD49,ARID4A,SMARCA4,DNAJC2,GTF2F1,THRAP3,SP100,LARP7,AGO2,PIK3R1,CEBPZ,TOPORS,CCAR1,NIPBL,TAF3,ASH1L,KDM5A,SMARCC1,MED1,PRPF6,MGA,ZNF609,ASXL2,KMT2E,ILF3,PPP1R12A,CHD7,ZNF281,BPTF,KLF7,CDC5L,MTF1,BCLAF1
GO:BP	regulation of RNA metabolic process	GO:0051252	0.00008639861753721872	2428	426	101	17277	BRD8,NR3C1,TCF7L2,ARID5B,ATM,RPS6KA5,TGFB2,EGR2,TRAF5,CENPF,PRKDC,ETV6,MPHOSPH8,BHLHE41,JAK2,ACTN1,MLLT10,MIER1,PUF60,ATRX,TRAF3,BAZ1B,ZC3HAV1,TAF4B,CEP290,MED14,ZBTB1,DTX3L,GIGYF2,ZFP36,RIF1,THOC1,FAM172A,RLF,INO80,BRWD1,GNL3,TCERG1,PHIP,ANKRD49,ARID4A,SMARCA4,PHF14,DNAJC2,NSRP1,LARP1B,RBM25,GTF2F1,THRAP3,SETD5,SP100,ROCK1,SUZ12,LARP7,AGO2,PIK3R1,TNRC6B,CEBPZ,TOPORS,DNMT3A,CCAR1,NIPBL,TAF3,ASH1L…
GO:BP	positive regulation of RNA biosynthetic process	GO:1902680	0.00009085871453952037	1154	381	55	17277	BRD8,NR3C1,TCF7L2,ARID5B,ATM,RPS6KA5,TGFB2,EGR2,PRKDC,ETV6,JAK2,ACTN1,MLLT10,ATRX,BAZ1B,TAF4B,CEP290,DTX3L,THOC1,INO80,GNL3,PHIP,ANKRD49,ARID4A,SMARCA4,DNAJC2,GTF2F1,THRAP3,SP100,LARP7,AGO2,PIK3R1,CEBPZ,TOPORS,CCAR1,NIPBL,TAF3,ASH1L,KDM5A,SMARCC1,MED1,PRPF6,MGA,ZNF609,ASXL2,KMT2E,ILF3,PPP1R12A,CHD7,ZNF281,BPTF,KLF7,CDC5L,MTF1,BCLAF1
GO:BP	regulation of nucleobase-containing compound metabolic process	GO:0019219	0.00009218085389721005	2628	426	107	17277	BRD8,NR3C1,TCF7L2,ARID5B,ATM,RPS6KA5,TGFB2,EGR2,TRAF5,CENPF,ATAD5,PRKDC,ETV6,MPHOSPH8,BHLHE41,JAK2,ACTN1,MLLT10,MIER1,PUF60,ATRX,TRAF3,BAZ1B,ZC3HAV1,TAF4B,CEP290,MED14,ZBTB1,DTX3L,GIGYF2,RAD50,ZFP36,RIF1,THOC1,FAM172A,RLF,LACC1,INO80,BRWD1,GNL3,TCERG1,PHIP,ANKRD49,ARID4A,SMARCA4,PHF14,DNAJC2,NSRP1,LARP1B,RBM25,GTF2F1,THRAP3,SETD5,SP100,ROCK1,SUZ12,LARP7,AGO2,PIK3R1,RBBP6,TNRC6B,CEBPZ,TOPORS,DNMT3…
GO:BP	regulation of primary metabolic process	GO:0080090	0.0001226415042863264	3491	426	132	17277	BRD8,NR3C1,TCF7L2,RAB1A,ARID5B,ATM,RPS6KA5,SERPINE1,TMTC3,TGFB2,EGR2,CBLB,TRAF5,CENPF,ATAD5,PRKDC,ETV6,AKAP9,MPHOSPH8,BHLHE41,JAK2,ACTN1,MTBP,MLLT10,MIER1,PUF60,ATRX,TRAF3,CEP295,BAZ1B,ZC3HAV1,EIF5B,TAF4B,CEP290,MED14,ZBTB1,DTX3L,GIGYF2,RAD50,ZFP36,RIF1,THOC1,PTEN,FAM172A,RLF,PIBF1,LACC1,INO80,BRWD1,GNL3,TCERG1,PHIP,ANKRD49,RALBP1,ARID4A,PAOX,GLG1,SMARCA4,PHF14,DNAJC2,CCNYL1,SYK,NSRP1,LARP1B,RBM2…
GO:BP	positive regulation of cell cycle process	GO:0090068	0.000128544551606785	168	399	18	17277	ATAD5,MTBP,ATRX,CEP295,KIF20B,SMC4,THOC1,SMC6,INO80,DYNC1H1,ADAM17,PKN2,RAD18,MED1,KMT2E,AIF1,CEP120,ANKRD17
GO:BP	protein-DNA complex organization	GO:0071824	0.00017614163346054478	504	422	34	17277	NR3C1,RPS6KA5,CENPE,MPHOSPH8,JAK2,MIER1,ATRX,BAZ1B,RAD54L2,ZBTB1,DTX3L,DCAF13,RIF1,INO80,CENPC,ARID4A,SMARCA4,SETD5,SUZ12,CHD1,CHD9,DNMT3A,NIPBL,TAF3,ASH1L,KDM5A,SMARCC1,CHD7,BPTF,CHD2,BRD7,IWS1,UBR5,DDX21
GO:BP	regulation of cell cycle	GO:0051726	0.00027164867303578643	684	410	40	17277	BRD8,IQGAP1,ATM,ASPM,CENPE,CENPF,ATAD5,PRKDC,MTBP,ATRX,CEP295,BAZ1B,KIF20B,DTX3L,GIGYF2,SMC4,THOC1,PTEN,SMC6,INO80,DYNC1H1,CLSPN,ADAM17,PKN2,CCNYL1,ETAA1,RAD18,CYLD,SON,MED1,CCNH,KMT2E,TIPIN,AIF1,CDC5L,CEP120,BRD7,RPS6KB1,ANKRD17,APC
GO:BP	chromatin remodeling	GO:0006338	0.00028937760454204994	396	422	29	17277	RPS6KA5,MPHOSPH8,JAK2,MIER1,ATRX,BAZ1B,RAD54L2,ZBTB1,DTX3L,DCAF13,RIF1,INO80,ARID4A,SMARCA4,SETD5,SUZ12,CHD1,CHD9,DNMT3A,NIPBL,ASH1L,SMARCC1,CHD7,BPTF,CHD2,BRD7,IWS1,UBR5,DDX21
GO:BP	chromosome segregation	GO:0007059	0.0003091187583999439	253	193	15	17277	ATM,ASPM,AKAP8,DIAPH3,CENPE,CENPF,BAZ1B,DCAF13,SMC4,PTEN,PIBF1,SMC6,INO80,CENPC,DYNC1H1
GO:BP	regulation of mRNA metabolic process	GO:1903311	0.00041839127575854816	195	412	19	17277	TRAF5,PUF60,ZC3HAV1,GIGYF2,ZFP36,FAM172A,NSRP1,LARP1B,RBM25,THRAP3,ROCK1,LARP7,AGO2,TNRC6B,SON,FXR1,PABPC4,IWS1,RBM39
GO:BP	mitotic cell cycle	GO:0000278	0.00043345289982576254	539	410	34	17277	IQGAP1,ATM,AKAP8,CENPE,CENPF,ATAD5,PRKDC,MTBP,MITD1,BAZ1B,KIF20B,GIGYF2,SMC4,PTEN,PIBF1,INO80,CENPC,DYNC1H1,CLSPN,ADAM17,PKN2,PCNT,NIPBL,CYLD,SON,CCNH,KMT2E,PPP1R12A,TIPIN,AIF1,BRD7,RPS6KB1,ANKRD17,APC
GO:BP	regulation of cell cycle phase transition	GO:1901987	0.0005173030658582107	260	410	22	17277	ATM,CENPE,CENPF,ATAD5,PRKDC,MTBP,DTX3L,GIGYF2,THOC1,PTEN,INO80,CLSPN,ADAM17,ETAA1,CCNH,KMT2E,TIPIN,AIF1,CDC5L,BRD7,ANKRD17,APC
GO:BP	chromatin organization	GO:0006325	0.000854450041994618	465	422	31	17277	NR3C1,RPS6KA5,MPHOSPH8,JAK2,MIER1,ATRX,BAZ1B,RAD54L2,ZBTB1,DTX3L,DCAF13,RIF1,INO80,ARID4A,SMARCA4,SETD5,SUZ12,CHD1,CHD9,DNMT3A,NIPBL,ASH1L,KDM5A,SMARCC1,CHD7,BPTF,CHD2,BRD7,IWS1,UBR5,DDX21
GO:BP	regulation of G1/S transition of mitotic cell cycle	GO:2000045	0.0010650087625463254	83	410	12	17277	PRKDC,MTBP,GIGYF2,PTEN,INO80,ADAM17,CCNH,KMT2E,AIF1,BRD7,ANKRD17,APC
GO:BP	DNA damage response	GO:0006974	0.0013601080400865572	603	421	36	17277	POLN,BRD8,ATM,ATAD5,PRKDC,POLD2,ATRX,BAZ1B,ZBTB1,DTX3L,GIGYF2,BOD1L1,RAD50,RIF1,THOC1,SMC6,INO80,CLSPN,SP100,PIK3R1,RBBP6,ETAA1,RAD18,TOPORS,NIPBL,FAAP100,TIPIN,MUS81,SLX1A,CDC5L,CHD2,BCLAF1,UBR5,APC,SETX,RFC1
GO:BP	regulation of cilium assembly	GO:1902017	0.0014754361497043506	60	597	12	17277	ARHGAP35,CEP135,CENPJ,SYNE2,CYLD,CEP120,IFT20,YAP1,RAB11A,TBC1D7,AKT1,LPAR1
GO:BP	positive regulation of biological process	GO:0048518	0.0017162211946095773	4021	457	151	17277	BRD8,NR3C1,TCF7L2,RAB1A,PLCE1,TNFRSF11A,IQGAP1,ARID5B,CXCL10,TNFSF10,ATM,ASPM,RPS6KA5,SERPINE1,UTRN,FMN1,SHTN1,TMTC3,TGFB2,EGR2,CBLB,PDIA3,ARHGAP35,TRAF5,DLA-DRA,EPB41,ATAD5,PRKDC,ETV6,APBB1IP,AKAP9,CEP135,MPHOSPH8,JAK2,ACTN1,USP34,MTBP,MLLT10,ATRX,TRAF3,CENPJ,CEP295,BAZ1B,ZC3HAV1,KIF20B,TAF4B,CEP290,ZBTB1,DTX3L,GIGYF2,RAD50,ZFP36,RIF1,SMC4,THOC1,PTEN,PIBF1,LACC1,SMC6,INO80,GNL3,GOLGA4,IL18RAP,DY…
GO:BP	positive regulation of cell cycle	GO:0045787	0.0017730261949234214	221	399	19	17277	ATAD5,MTBP,ATRX,CEP295,KIF20B,SMC4,THOC1,SMC6,INO80,DYNC1H1,ADAM17,PKN2,RAD18,MED1,KMT2E,AIF1,CEP120,RPS6KB1,ANKRD17
GO:BP	organelle assembly	GO:0070925	0.0019093336888287365	636	475	40	17277	PLEC,RAB1A,ASPM,DIAPH3,ARHGAP35,CENPE,PRKDC,CEP135,CENPJ,CEP295,EIF5B,CEP290,DCAF13,CEP89,PTEN,PIBF1,INO80,CENPC,PRRC2C,DYNC1H1,CCDC66,CEP152,PCNT,SYNE2,CPLANE1,CYLD,FXR1,RB1CC1,OGFOD1,CEP350,CEP120,RDX,EIF5,EP400,IFT20,ZDHHC12,SNX4,YAP1,RAB11A,TBC1D7
GO:BP	cell cycle phase transition	GO:0044770	0.0023566355319394675	330	410	24	17277	ATM,AKAP8,CENPE,CENPF,ATAD5,PRKDC,MTBP,DTX3L,GIGYF2,THOC1,PTEN,INO80,CLSPN,ADAM17,ETAA1,CCNH,KMT2E,TIPIN,AIF1,CDC5L,BRD7,RPS6KB1,ANKRD17,APC
GO:BP	regulation of plasma membrane bounded cell projection assembly	GO:0120032	0.0024109187585214624	138	597	18	17277	PLCE1,ARHGAP35,CEP135,CENPJ,SYNE2,PIK3R1,CYLD,CEP120,RDX,APC,IFT20,YAP1,RAB11A,TBC1D7,AKIRIN1,AKT1,NCKAP1,LPAR1
GO:BP	mitotic cell cycle process	GO:1903047	0.0024471562532304447	452	410	29	17277	ATM,AKAP8,CENPE,CENPF,ATAD5,PRKDC,MTBP,MITD1,BAZ1B,KIF20B,GIGYF2,SMC4,PTEN,PIBF1,INO80,DYNC1H1,CLSPN,ADAM17,PCNT,NIPBL,SON,CCNH,KMT2E,TIPIN,AIF1,BRD7,RPS6KB1,ANKRD17,APC
GO:BP	regulation of cell projection assembly	GO:0060491	0.0026821467142620478	139	597	18	17277	PLCE1,ARHGAP35,CEP135,CENPJ,SYNE2,PIK3R1,CYLD,CEP120,RDX,APC,IFT20,YAP1,RAB11A,TBC1D7,AKIRIN1,AKT1,NCKAP1,LPAR1
GO:BP	DNA-templated transcription	GO:0006351	0.0031416558476702206	2348	426	93	17277	BRD8,NR3C1,TCF7L2,ARID5B,ATM,RPS6KA5,TGFB2,CDC73,EGR2,CENPF,PRKDC,ETV6,MPHOSPH8,BHLHE41,JAK2,ACTN1,MLLT10,MIER1,ATRX,TRAF3,BAZ1B,TAF4B,CEP290,MED14,ZBTB1,DTX3L,ZFP36,RIF1,THOC1,RLF,INO80,BRWD1,GNL3,TCERG1,PHIP,ANKRD49,ARID4A,PCF11,SMARCA4,PHF14,DNAJC2,TCEA1,CRCP,GTF2F1,THRAP3,SETD5,SP100,ELOA,SUZ12,LARP7,AGO2,PIK3R1,CEBPZ,TOPORS,DNMT3A,CCAR1,NIPBL,TAF3,ASH1L,POLR2K,KDM5A,SMARCC1,MED1,PRPF6,ZNF394…
GO:BP	positive regulation of organelle organization	GO:0010638	0.003296600251299776	337	198	16	17277	TNFSF10,ATM,FMN1,ARHGAP35,AKAP9,CEP135,MPHOSPH8,ATRX,CENPJ,CEP295,RAD50,SMC4,INO80,GNL3,DYNC1H1,RALBP1
GO:BP	organelle organization	GO:0006996	0.0033279738150632752	2274	598	119	17277	PLEC,TCF7L2,LMNB1,RAB1A,TNFSF10,ATM,ASPM,THEM4,FMN1,SHTN1,AKAP8,DIAPH3,ARHGAP35,CENPE,EPB41,PRKDC,AKAP9,CEP135,MPHOSPH8,ZMYM4,ACTN1,MTBP,ATRX,CENPJ,CEP295,BAZ1B,EIF5B,CEP290,DCAF13,GIGYF2,CEP89,RAD50,RIF1,SMC4,SPART,PTEN,PIBF1,SMC6,INO80,BRWD1,CENPC,VPS13C,GNL3,PRRC2C,DYNC1H1,PHIP,CCDC66,RALBP1,LOC102152706,MAP7D3,HSP90B1,CEP152,PCNT,SP100,ROCK1,SYNE2,PIK3R1,BRWD3,CPLANE1,NIPBL,MTIF3,CYLD,DNTTIP2…
GO:BP	nuclear chromosome segregation	GO:0098813	0.00394412011336332	196	193	12	17277	ATM,ASPM,AKAP8,CENPE,CENPF,BAZ1B,DCAF13,SMC4,PTEN,PIBF1,INO80,DYNC1H1
GO:BP	G1/S transition of mitotic cell cycle	GO:0000082	0.00423861358014289	111	410	13	17277	PRKDC,MTBP,GIGYF2,PTEN,INO80,ADAM17,CCNH,KMT2E,AIF1,BRD7,RPS6KB1,ANKRD17,APC
GO:BP	transcription by RNA polymerase II	GO:0006366	0.004362086552576395	1496	426	66	17277	BRD8,NR3C1,TCF7L2,ARID5B,ATM,RPS6KA5,CDC73,EGR2,PRKDC,ETV6,BHLHE41,JAK2,MLLT10,ATRX,TAF4B,MED14,ZBTB1,ZFP36,RIF1,RLF,INO80,BRWD1,PHIP,ARID4A,PCF11,SMARCA4,PHF14,TCEA1,GTF2F1,THRAP3,SP100,ELOA,SUZ12,LARP7,AGO2,PIK3R1,CEBPZ,DNMT3A,NIPBL,TAF3,ASH1L,SMARCC1,MED1,PRPF6,ZNF609,ASXL2,NKAP,CCNH,PSMC5,PPP1R12A,CHD7,ZNF281,SPEN,BPTF,KLF7,CIR1,CDC5L,MTF1,BRD7,PTPN2,IWS1,SETX,OGT,DDX21,MED10,HIVEP1
GO:BP	RNA biosynthetic process	GO:0032774	0.004364182228097523	2366	426	93	17277	BRD8,NR3C1,TCF7L2,ARID5B,ATM,RPS6KA5,TGFB2,CDC73,EGR2,CENPF,PRKDC,ETV6,MPHOSPH8,BHLHE41,JAK2,ACTN1,MLLT10,MIER1,ATRX,TRAF3,BAZ1B,TAF4B,CEP290,MED14,ZBTB1,DTX3L,ZFP36,RIF1,THOC1,RLF,INO80,BRWD1,GNL3,TCERG1,PHIP,ANKRD49,ARID4A,PCF11,SMARCA4,PHF14,DNAJC2,TCEA1,CRCP,GTF2F1,THRAP3,SETD5,SP100,ELOA,SUZ12,LARP7,AGO2,PIK3R1,CEBPZ,TOPORS,DNMT3A,CCAR1,NIPBL,TAF3,ASH1L,POLR2K,KDM5A,SMARCC1,MED1,PRPF6,ZNF394…
GO:BP	chromosome organization	GO:0051276	0.005212013465346887	370	187	16	17277	TCF7L2,ATM,AKAP8,CENPE,PRKDC,MPHOSPH8,ATRX,BAZ1B,RAD50,RIF1,SMC4,PIBF1,SMC6,INO80,CENPC,GNL3
GO:BP	regulation of cell cycle G1/S phase transition	GO:1902806	0.00581317378331393	97	410	12	17277	PRKDC,MTBP,GIGYF2,PTEN,INO80,ADAM17,CCNH,KMT2E,AIF1,BRD7,ANKRD17,APC
GO:BP	regulation of mitotic cell cycle	GO:0007346	0.0067242699768575945	303	410	22	17277	IQGAP1,ATM,CENPE,CENPF,ATAD5,PRKDC,MTBP,GIGYF2,PTEN,INO80,CLSPN,ADAM17,PKN2,CYLD,CCNH,KMT2E,TIPIN,AIF1,BRD7,RPS6KB1,ANKRD17,APC
GO:BP	regulation of mitotic cell cycle phase transition	GO:1901990	0.007872480036827823	195	410	17	17277	ATM,CENPE,CENPF,ATAD5,PRKDC,MTBP,GIGYF2,PTEN,INO80,CLSPN,ADAM17,CCNH,KMT2E,AIF1,BRD7,ANKRD17,APC
GO:BP	negative regulation of nitrogen compound metabolic process	GO:0051172	0.008780326194336793	1282	396	55	17277	NR3C1,TCF7L2,ARID5B,ATM,RPS6KA5,SERPINE1,TRAF5,CENPF,ETV6,MPHOSPH8,BHLHE41,ZBTB1,GIGYF2,RAD50,ZFP36,RIF1,THOC1,PTEN,PIBF1,ARID4A,GLG1,SMARCA4,PHF14,DNAJC2,LARP1B,THRAP3,SORL1,SETD5,SP100,ROCK1,SUZ12,LARP7,AGO2,TNRC6B,DNMT3A,CCAR1,NIPBL,TAF3,SMARCC1,GGNBP2,MED1,FXR1,NKAP,ILF3,PSMC5,ZNF281,SPEN,PHF20L1,BPTF,KLF7,CIR1,BCLAF1,BRD7,PTPN2,PSPC1
GO:BP	regulation of macromolecule metabolic process	GO:0060255	0.010853588919814342	4138	426	142	17277	BRD8,NR3C1,TCF7L2,RAB1A,IQGAP1,ARID5B,ATM,RPS6KA5,SERPINE1,AKAP8,TMTC3,TGFB2,EGR2,CBLB,TRAF5,CENPF,ATAD5,PRKDC,ETV6,AKAP9,MPHOSPH8,BHLHE41,JAK2,ACTN1,MTBP,MLLT10,MIER1,PUF60,ATRX,TRAF3,CEP295,BAZ1B,ZC3HAV1,EIF5B,TAF4B,CEP290,MED14,ZBTB1,DTX3L,DCAF13,GIGYF2,RAD50,ZFP36,UPF2,RIF1,THOC1,PTEN,FAM172A,RLF,PIBF1,LACC1,INO80,BRWD1,GNL3,TCERG1,PHIP,ANKRD49,RALBP1,ARID4A,GLG1,SMARCA4,ADAM17,PHF14,DNAJC2,C…
GO:BP	regulation of macromolecule biosynthetic process	GO:0010556	0.010905446586491471	3598	426	127	17277	BRD8,NR3C1,TCF7L2,RAB1A,IQGAP1,ARID5B,ATM,RPS6KA5,SERPINE1,AKAP8,TGFB2,EGR2,TRAF5,CENPF,ATAD5,PRKDC,ETV6,MPHOSPH8,BHLHE41,JAK2,ACTN1,MLLT10,MIER1,PUF60,ATRX,TRAF3,BAZ1B,ZC3HAV1,EIF5B,TAF4B,CEP290,MED14,ZBTB1,DTX3L,DCAF13,GIGYF2,ZFP36,UPF2,RIF1,THOC1,FAM172A,RLF,PIBF1,LACC1,INO80,BRWD1,GNL3,TCERG1,PHIP,ANKRD49,ARID4A,GLG1,SMARCA4,ADAM17,PHF14,DNAJC2,SYK,NSRP1,LARP1B,RBM25,GTF2F1,THRAP3,SORL1,SETD5…
GO:BP	macromolecule localization	GO:0033036	0.011671914422070799	1932	631	107	17277	CPE,LOC102156332,PLEC,TCF7L2,TNFRSF11A,UTP25,ATM,GRAMD1B,TGFB2,NVL,EGR2,STX3,CENPF,EPB41,CEP135,UGCG,MTBP,BTF3,ATRX,CEP295,KIF20B,CEP290,DTX3L,ZFP36,THOC2,THOC1,RRBP1,PIBF1,VPS13C,GNL3,GOLGA4,CCDC66,PABPN1,NOP58,SYK,HSP90B1,SORL1,PCNT,SP100,ROCK1,LARP7,PIK3R1,NMT1,CPLANE1,TOPORS,NIPBL,TAF3,CYLD,KTN1,AP2B1,MED1,PRPF6,TNPO3,SSB,CEP350,KLF7,CEP120,RPS6KB1,PTPN2,NCBP3,RDX,IWS1,UBR5,VPS11,APC,EP400,OG…
GO:BP	regulation of gene expression	GO:0010468	0.012275230271913122	3535	426	125	17277	BRD8,NR3C1,TCF7L2,RAB1A,IQGAP1,ARID5B,ATM,RPS6KA5,SERPINE1,AKAP8,TGFB2,EGR2,TRAF5,CENPF,ATAD5,PRKDC,ETV6,MPHOSPH8,BHLHE41,JAK2,ACTN1,MLLT10,MIER1,PUF60,ATRX,TRAF3,BAZ1B,ZC3HAV1,EIF5B,TAF4B,CEP290,MED14,ZBTB1,DTX3L,DCAF13,GIGYF2,ZFP36,UPF2,RIF1,THOC1,FAM172A,RLF,PIBF1,LACC1,INO80,BRWD1,GNL3,TCERG1,PHIP,ANKRD49,ARID4A,GLG1,SMARCA4,ADAM17,PHF14,DNAJC2,SYK,NSRP1,LARP1B,RBM25,GTF2F1,THRAP3,SORL1,SETD5…
GO:BP	mRNA catabolic process	GO:0006402	0.013620046336132521	169	392	15	17277	ATM,TRAF5,ZC3HAV1,GIGYF2,ZFP36,UPF2,LARP1B,THRAP3,ROCK1,AGO2,TNRC6B,FXR1,EDC3,SSB,PABPC4
GO:BP	response to hormone	GO:0009725	0.01410183166703059	403	585	32	17277	TFPI,BRD8,NR3C1,AKAP8,TGFB2,PRKDC,UGCG,JAK2,ZFP36,SAFB2,VPS13C,SMARCA4,SORL1,ROCK1,PIK3R1,SMARCC1,MED1,RPS6KB1,PTPN2,UBR5,APC,OGT,YAP1,SYAP1,ABHD2,AKT1,TGFBR3,BCAS3,GCLC,PIK3R2,CAV2,SESN2
GO:BP	meiotic spindle organization	GO:0000212	0.014134251323026925	14	166	4	17277	ASPM,ATRX,DCAF13,PTEN
GO:BP	response to lipid	GO:0033993	0.014938355653378695	416	57	9	17277	TFPI,NR3C1,TNFRSF11A,CXCL10,ATM,SERPINE1,GRAMD1B,AKAP8,TGFB2
GO:BP	regulation of cellular biosynthetic process	GO:0031326	0.01896012669935725	3673	426	128	17277	BRD8,NR3C1,TCF7L2,RAB1A,IQGAP1,ARID5B,ATM,RPS6KA5,SERPINE1,AKAP8,TGFB2,EGR2,TRAF5,CENPF,ATAD5,PRKDC,ETV6,MPHOSPH8,BHLHE41,JAK2,ACTN1,MLLT10,MIER1,PUF60,ATRX,TRAF3,BAZ1B,ZC3HAV1,EIF5B,TAF4B,CEP290,MED14,ZBTB1,DTX3L,DCAF13,GIGYF2,ZFP36,UPF2,RIF1,THOC1,FAM172A,RLF,PIBF1,LACC1,INO80,BRWD1,GNL3,TCERG1,PHIP,ANKRD49,ARID4A,PAOX,GLG1,SMARCA4,ADAM17,PHF14,DNAJC2,SYK,NSRP1,LARP1B,RBM25,GTF2F1,THRAP3,SORL1,…
GO:BP	intracellular transport	GO:0046907	0.01938803882143991	862	631	57	17277	RAB1A,DIAPH3,EGR2,STX3,HYOU1,KIF20B,CEP290,DTX3L,THOC2,THOC1,DYNC1H1,PABPN1,SYK,HSP90B1,SORL1,PCNT,SP100,SYNE2,PIK3R1,AP2B1,MED1,PPP1R12A,TNPO3,SSB,LYST,CEP120,NCBP3,RDX,IWS1,UBR5,VPS11,CCDC91,IFT20,AP3S1,COPA,SNX4,MTCH1,TMED2,RAB11A,BLOC1S4,TRAM1,ARFIP1,UBE2J1,PREPL,CTTN,AP1M1,DOP1B,PAM16,SEC24D,AKT1,PIK3R2,HTATIP2,MREG,TMEM30B,HSPB1,GAS6,JUP
GO:BP	regulation of DNA-templated transcription	GO:0006355	0.019859948693431023	2218	426	86	17277	BRD8,NR3C1,TCF7L2,ARID5B,ATM,RPS6KA5,TGFB2,EGR2,CENPF,PRKDC,ETV6,MPHOSPH8,BHLHE41,JAK2,ACTN1,MLLT10,MIER1,ATRX,TRAF3,BAZ1B,TAF4B,CEP290,MED14,ZBTB1,DTX3L,ZFP36,RIF1,THOC1,RLF,INO80,BRWD1,GNL3,TCERG1,PHIP,ANKRD49,ARID4A,SMARCA4,PHF14,DNAJC2,GTF2F1,THRAP3,SETD5,SP100,SUZ12,LARP7,AGO2,PIK3R1,CEBPZ,TOPORS,DNMT3A,CCAR1,NIPBL,TAF3,ASH1L,KDM5A,SMARCC1,MED1,PRPF6,ZNF394,MGA,ZNF609,ASXL2,NKAP,CCNH,KMT2E,I…
GO:BP	cell cycle G1/S phase transition	GO:0044843	0.020764297633155057	128	410	13	17277	PRKDC,MTBP,GIGYF2,PTEN,INO80,ADAM17,CCNH,KMT2E,AIF1,BRD7,RPS6KB1,ANKRD17,APC
GO:BP	regulation of RNA biosynthetic process	GO:2001141	0.021654479537845935	2223	426	86	17277	BRD8,NR3C1,TCF7L2,ARID5B,ATM,RPS6KA5,TGFB2,EGR2,CENPF,PRKDC,ETV6,MPHOSPH8,BHLHE41,JAK2,ACTN1,MLLT10,MIER1,ATRX,TRAF3,BAZ1B,TAF4B,CEP290,MED14,ZBTB1,DTX3L,ZFP36,RIF1,THOC1,RLF,INO80,BRWD1,GNL3,TCERG1,PHIP,ANKRD49,ARID4A,SMARCA4,PHF14,DNAJC2,GTF2F1,THRAP3,SETD5,SP100,SUZ12,LARP7,AGO2,PIK3R1,CEBPZ,TOPORS,DNMT3A,CCAR1,NIPBL,TAF3,ASH1L,KDM5A,SMARCC1,MED1,PRPF6,ZNF394,MGA,ZNF609,ASXL2,NKAP,CCNH,KMT2E,I…
GO:BP	telomere maintenance	GO:0000723	0.02184166081630042	101	241	9	17277	ATM,PRKDC,ATRX,RAD50,RIF1,SMC6,INO80,GNL3,SP100
GO:BP	regulation of extrinsic apoptotic signaling pathway	GO:2001236	0.022957246491482154	110	559	14	17277	TNFSF10,SERPINE1,PDIA3,TMC8,PHIP,ZC3HC1,SP100,CYLD,DNTTIP2,RB1CC1,RPS6KB1,YAP1,CTTN,GCLC
GO:BP	rRNA metabolic process	GO:0016072	0.02414340618408466	142	319	12	17277	UTP25,NVL,DDX52,PRKDC,PPAN,FTSJ3,DCAF13,SMARCA4,DIS3,PDCD11,MPHOSPH10,UTP20
GO:BP	telomere organization	GO:0032200	0.025622863719516272	103	241	9	17277	ATM,PRKDC,ATRX,RAD50,RIF1,SMC6,INO80,GNL3,SP100
GO:BP	positive regulation of neuron migration	GO:2001224	0.026301275156642757	9	324	4	17277	SHTN1,KIF20B,NIPBL,ZNF609
GO:BP	regulation of biosynthetic process	GO:0009889	0.026708818576285258	3698	426	128	17277	BRD8,NR3C1,TCF7L2,RAB1A,IQGAP1,ARID5B,ATM,RPS6KA5,SERPINE1,AKAP8,TGFB2,EGR2,TRAF5,CENPF,ATAD5,PRKDC,ETV6,MPHOSPH8,BHLHE41,JAK2,ACTN1,MLLT10,MIER1,PUF60,ATRX,TRAF3,BAZ1B,ZC3HAV1,EIF5B,TAF4B,CEP290,MED14,ZBTB1,DTX3L,DCAF13,GIGYF2,ZFP36,UPF2,RIF1,THOC1,FAM172A,RLF,PIBF1,LACC1,INO80,BRWD1,GNL3,TCERG1,PHIP,ANKRD49,ARID4A,PAOX,GLG1,SMARCA4,ADAM17,PHF14,DNAJC2,SYK,NSRP1,LARP1B,RBM25,GTF2F1,THRAP3,SORL1,…
GO:BP	DNA metabolic process	GO:0006259	0.02737066756411559	674	296	28	17277	POLN,BRD8,TCF7L2,ATM,ATAD5,PRKDC,POLD2,MPHOSPH8,ATRX,ZBTB1,DTX3L,BOD1L1,RAD50,RIF1,THOC1,RLF,SMC6,INO80,GNL3,ARID4A,DNAJC2,SP100,GIN1,RBBP6,ETAA1,RAD18,DNMT3A,FAAP100
GO:BP	microtubule-based process	GO:0007017	0.028073199244722687	652	340	30	17277	RAB1A,ASPM,DIAPH3,CENPE,CFAP251,AKAP9,CEP135,ATRX,CENPJ,CEP295,KIF20B,DCAF13,KIF13B,PTEN,PIBF1,INO80,DYNC1H1,CCDC66,CCNYL1,MAP7D3,CEP152,PCNT,ROCK1,SYNE2,ASH1L,CYLD,SON,KTN1,KIF15,PPP1R12A
GO:BP	extrinsic apoptotic signaling pathway	GO:0097191	0.02816377011731717	160	336	13	17277	TNFSF10,SERPINE1,TGFB2,PDIA3,TMC8,JAK2,PHIP,ZC3HC1,SP100,PIK3R1,CYLD,DNTTIP2,RB1CC1
GO:BP	protein localization to organelle	GO:0033365	0.029294143893898353	659	477	38	17277	CPE,TCF7L2,UTP25,NVL,MTBP,BTF3,ATRX,KIF20B,DTX3L,PIBF1,GNL3,CCDC66,SYK,SORL1,SP100,LARP7,PIK3R1,CPLANE1,TOPORS,NIPBL,TAF3,MED1,TNPO3,SSB,CEP350,RDX,UBR5,APC,OGT,TOR1AIP1,IFT20,YAP1,MTCH1,TMED2,RAB11A,TRAM1,RAP1A,EMC4
GO:BP	positive regulation of chromosome organization	GO:2001252	0.030723999185289147	75	187	7	17277	ATM,MPHOSPH8,ATRX,RAD50,SMC4,INO80,GNL3
GO:BP	cellular response to hormone stimulus	GO:0032870	0.03074889448793691	329	576	27	17277	TFPI,BRD8,NR3C1,AKAP8,PRKDC,UGCG,JAK2,ZFP36,SAFB2,SMARCA4,SORL1,ROCK1,PIK3R1,SMARCC1,MED1,RPS6KB1,PTPN2,UBR5,APC,OGT,YAP1,SYAP1,ABHD2,AKT1,BCAS3,PIK3R2,CAV2
GO:BP	RNA catabolic process	GO:0006401	0.03263747404041311	204	392	16	17277	ATM,TRAF5,ZC3HAV1,GIGYF2,ZFP36,UPF2,LARP1B,THRAP3,ROCK1,AGO2,TNRC6B,DIS3,FXR1,EDC3,SSB,PABPC4
GO:BP	regulation of cellular metabolic process	GO:0031323	0.03561681153331512	4192	426	141	17277	BRD8,NR3C1,TCF7L2,RAB1A,IQGAP1,ARID5B,ATM,RPS6KA5,SERPINE1,AKAP8,TGFB2,EGR2,TRAF5,CENPF,ATAD5,PRKDC,ETV6,AKAP9,MPHOSPH8,BHLHE41,JAK2,ACTN1,MLLT10,MIER1,PUF60,ATRX,TRAF3,BAZ1B,ZC3HAV1,EIF5B,TAF4B,CEP290,MED14,ZBTB1,DTX3L,DCAF13,GIGYF2,RAD50,ZFP36,UPF2,RIF1,HERC1,THOC1,PTEN,FAM172A,RLF,PIBF1,LACC1,INO80,BRWD1,VPS13C,GNL3,TCERG1,PHIP,ANKRD49,RALBP1,ARID4A,PAOX,GLG1,SMARCA4,ADAM17,PHF14,DNAJC2,CCNYL1…
GO:BP	regulation of transcription by RNA polymerase II	GO:0006357	0.03745192908375798	1407	426	60	17277	BRD8,NR3C1,TCF7L2,ARID5B,ATM,RPS6KA5,EGR2,PRKDC,ETV6,BHLHE41,JAK2,MLLT10,ATRX,TAF4B,MED14,ZBTB1,ZFP36,RIF1,RLF,INO80,BRWD1,PHIP,ARID4A,SMARCA4,PHF14,GTF2F1,THRAP3,SP100,SUZ12,LARP7,AGO2,PIK3R1,CEBPZ,DNMT3A,NIPBL,TAF3,ASH1L,SMARCC1,MED1,PRPF6,ZNF609,ASXL2,NKAP,CCNH,PSMC5,PPP1R12A,CHD7,ZNF281,SPEN,BPTF,KLF7,CIR1,CDC5L,MTF1,BRD7,PTPN2,SETX,OGT,MED10,HIVEP1
GO:BP	translational initiation	GO:0006413	0.03908038874907294	99	485	12	17277	EIF5B,GIGYF2,EIF4G3,LOC612587,AGO2,MTIF2,MTIF3,EIF3J,RPS6KB1,EIF5,TMED2,EIF4E
GO:BP	signal transduction in response to DNA damage	GO:0042770	0.044158192925474085	130	371	12	17277	ATM,ATAD5,PRKDC,ATRX,DTX3L,GIGYF2,THOC1,CLSPN,SP100,ETAA1,TIPIN,CDC5L
GO:BP	nucleobase-containing compound biosynthetic process	GO:0034654	0.04552694852281109	2677	426	98	17277	POLN,NME1,BRD8,NR3C1,TCF7L2,ARID5B,ATM,RPS6KA5,TGFB2,CDC73,EGR2,CENPF,PRKDC,ETV6,POLD2,MPHOSPH8,BHLHE41,JAK2,ACTN1,MLLT10,MIER1,ATRX,TRAF3,BAZ1B,TAF4B,CEP290,MED14,ZBTB1,DTX3L,RAD50,ZFP36,RIF1,THOC1,RLF,INO80,BRWD1,GNL3,TCERG1,PHIP,ANKRD49,ARID4A,PCF11,SMARCA4,PHF14,DNAJC2,TCEA1,CRCP,GTF2F1,THRAP3,SETD5,SP100,ELOA,SUZ12,LARP7,AGO2,PIK3R1,CEBPZ,TOPORS,DNMT3A,CCAR1,NIPBL,TAF3,ASH1L,POLR2K,KDM5A,SMA…
GO:BP	microtubule cytoskeleton organization	GO:0000226	0.04902306174098826	430	258	19	17277	ASPM,DIAPH3,CENPE,AKAP9,CEP135,ATRX,CENPJ,CEP295,DCAF13,PTEN,PIBF1,INO80,DYNC1H1,CCDC66,MAP7D3,CEP152,PCNT,ROCK1,SYNE2
GO:CC	nucleoplasm	GO:0005654	1.11812e-05	2772	427	151	17694	POLN,BRD8,NR3C1,TCF7L2,LMNB1,UBN2,TNRC18,ATM,RPS6KA5,UTRN,AKAP8,NOC3L,CDC73,NVL,EGR2,CBLB,CENPF,EPB41,PRKDC,EHBP1,POLD2,MPHOSPH8,JAK2,MLLT10,MIER1,PUF60,ATRX,BAZ1B,KIF20B,TAF4B,FTSJ3,NOP14,PPIG,ZBTB1,DTX3L,DCAF13,BOD1L1,RIF1,SAFB2,SCAPER,SMC4,THOC1,PTEN,ANKRD11,SMC6,INO80,ARID4B,CENPC,GNL3,GOLGA4,ANKRD12,TCERG1,RALBP1,ACIN1,RARS1,SRRM1,ARID4A,YLPM1,CLSPN,PCF11,SMARCA4,ZC3HC1,PKN2,NOP58,NSRP1,RBM2…
GO:CC	nuclear lumen	GO:0031981	1.38431	3735	427	170	17694	NOM1,POLN,BRD8,NR3C1,TCF7L2,LMNB1,UBN2,UTP25,TNRC18,ATM,RPS6KA5,UTRN,AKAP8,NOC3L,CDC73,LOC119871705,NVL,EGR2,CBLB,LOC119870566,CENPF,EPB41,PRKDC,EHBP1,ETV6,PPAN,POLD2,MPHOSPH8,JAK2,MLLT10,MIER1,PUF60,ATRX,BAZ1B,KIF20B,TAF4B,FTSJ3,NOP14,PPIG,ZBTB1,DTX3L,DCAF13,BOD1L1,RIF1,SAFB2,SCAPER,SMC4,THOC1,PTEN,ANKRD11,SMC6,INO80,BRWD1,ARID4B,CENPC,GNL3,GOLGA4,ANKRD12,TCERG1,RALBP1,ACIN1,RARS1,SRRM1,ARID4A,Y…
GO:CC	membrane-enclosed lumen	GO:0031974	0.93741	4007	427	176	17694	NOM1,POLN,BRD8,NR3C1,TCF7L2,LMNB1,UBN2,UTP25,TNRC18,ATM,RPS6KA5,UTRN,AKAP8,NOC3L,CDC73,LOC119871705,NVL,EGR2,CBLB,LOC119870566,PDIA3,CENPF,EPB41,PRKDC,EHBP1,ETV6,PPAN,POLD2,MPHOSPH8,JAK2,MLLT10,MIER1,PUF60,ATRX,BAZ1B,KIF20B,TAF4B,FTSJ3,NOP14,PPIG,ZBTB1,DTX3L,DCAF13,BOD1L1,RIF1,SAFB2,SCAPER,SMC4,THOC1,PTEN,ANKRD11,SMC6,INO80,BRWD1,ARID4B,CENPC,GNL3,GOLGA4,ANKRD12,TCERG1,RALBP1,ACIN1,RARS1,SRRM1,AR…
GO:CC	intracellular organelle lumen	GO:0070013	0.93741	4007	427	176	17694	NOM1,POLN,BRD8,NR3C1,TCF7L2,LMNB1,UBN2,UTP25,TNRC18,ATM,RPS6KA5,UTRN,AKAP8,NOC3L,CDC73,LOC119871705,NVL,EGR2,CBLB,LOC119870566,PDIA3,CENPF,EPB41,PRKDC,EHBP1,ETV6,PPAN,POLD2,MPHOSPH8,JAK2,MLLT10,MIER1,PUF60,ATRX,BAZ1B,KIF20B,TAF4B,FTSJ3,NOP14,PPIG,ZBTB1,DTX3L,DCAF13,BOD1L1,RIF1,SAFB2,SCAPER,SMC4,THOC1,PTEN,ANKRD11,SMC6,INO80,BRWD1,ARID4B,CENPC,GNL3,GOLGA4,ANKRD12,TCERG1,RALBP1,ACIN1,RARS1,SRRM1,AR…
GO:CC	organelle lumen	GO:0043233	0.93741	4007	427	176	17694	NOM1,POLN,BRD8,NR3C1,TCF7L2,LMNB1,UBN2,UTP25,TNRC18,ATM,RPS6KA5,UTRN,AKAP8,NOC3L,CDC73,LOC119871705,NVL,EGR2,CBLB,LOC119870566,PDIA3,CENPF,EPB41,PRKDC,EHBP1,ETV6,PPAN,POLD2,MPHOSPH8,JAK2,MLLT10,MIER1,PUF60,ATRX,BAZ1B,KIF20B,TAF4B,FTSJ3,NOP14,PPIG,ZBTB1,DTX3L,DCAF13,BOD1L1,RIF1,SAFB2,SCAPER,SMC4,THOC1,PTEN,ANKRD11,SMC6,INO80,BRWD1,ARID4B,CENPC,GNL3,GOLGA4,ANKRD12,TCERG1,RALBP1,ACIN1,RARS1,SRRM1,AR…
GO:CC	nuclear body	GO:0016604	56.8323	633	426	53	17694	NR3C1,NOC3L,EPB41,ATRX,PPIG,ZBTB1,SAFB2,SCAPER,SMC4,THOC1,PTEN,SMC6,INO80,CENPC,GNL3,RALBP1,SRRM1,YLPM1,PKN2,NOP58,NSRP1,RBM25,THRAP3,EFTUD2,SP100,TELO2,DBF4,SRSF11,PNISR,CWC22,RBBP6,DDX46,RAD18,TOPORS,SREK1,CWC25,SON,PRPF6,LUC7L3,KMT2E,PNN,CIR1,CDC5L,BCLAF1,COIL,PSPC1,NCBP3,SLTM,RBM39,GPATCH2,SETX,PRPF4B,HIVEP1
GO:CC	nuclear speck	GO:0016607	86050	282	425	32	17694	NR3C1,NOC3L,PPIG,SCAPER,SMC4,THOC1,SRRM1,YLPM1,NSRP1,RBM25,THRAP3,EFTUD2,SRSF11,PNISR,CWC22,RBBP6,DDX46,TOPORS,SREK1,CWC25,SON,PRPF6,LUC7L3,PNN,CIR1,CDC5L,BCLAF1,PSPC1,NCBP3,RBM39,GPATCH2,PRPF4B
GO:CC	microtubule cytoskeleton	GO:0015630	0.000001503877704917903	976	551	65	17694	PLEC,NR3C1,SPECC1L,IQGAP1,STAU2,ATM,ASPM,HMMR,SHTN1,DIAPH3,ARHGAP35,TRAF5,CENPE,CENPF,EPB41,AKAP9,CEP135,CENPJ,CEP295,KIF20B,CEP290,DCAF13,CEP89,KIF13B,RIF1,SKP1,PIBF1,SMC6,DYNC1H1,CCDC66,GLG1,PKN2,MAP7D3,CEP152,PCNT,RBBP6,GNAI2,RAD18,TOPORS,RABL6,CYLD,KIF15,ITSN2,PIK3R5,PPP1R12A,CEP350,CIR1,LYST,CEP120,MACF1,APC,RBM39,BBLN,IFT20,SNX4,RAB11A,TBC1D7,ARL2BP,TNKS2,DPF2,CTTN,DYNLRB1,RP2,CIAO2B,AKT1
GO:CC	microtubule organizing center	GO:0005815	0.000006263637648128952	602	498	43	17694	NR3C1,ATM,HMMR,DIAPH3,ARHGAP35,TRAF5,CENPF,AKAP9,CEP135,CENPJ,CEP295,KIF20B,CEP290,DCAF13,CEP89,SKP1,PIBF1,DYNC1H1,CCDC66,GLG1,PKN2,CEP152,PCNT,RBBP6,GNAI2,RAD18,TOPORS,RABL6,CYLD,ITSN2,PIK3R5,PPP1R12A,CEP350,CIR1,CEP120,APC,RBM39,IFT20,RAB11A,TBC1D7,ARL2BP,TNKS2,DPF2
GO:CC	nucleus	GO:0005634	0.000008092905345831838	7434	427	235	17694	NOM1,POLN,LOC119864069,LOC119866970,BRD8,NR3C1,TCF7L2,LMNB1,UBN2,IQGAP1,SYCP2,UTP25,LOC119871388,TNRC18,ATM,ASPM,RPS6KA5,UTRN,FMN1,AKAP8,NOC3L,CDC73,DIAPH3,LOC119871705,NVL,EGR2,CBLB,LOC119870566,CENPE,CENPF,EPB41,ATAD5,PRKDC,EHBP1,ETV6,PPAN,TMC8,POLD2,MPHOSPH8,JAK2,MLLT10,MIER1,PUF60,ATRX,BAZ1B,KIF20B,TAF4B,RAD54L2,FTSJ3,CEP290,NOP14,MED14,PPIG,ZBTB1,DTX3L,DCAF13,BOD1L1,RAD50,ZFP36,UPF2,ZFC3H1,R…
GO:CC	intracellular non-membrane-bounded organelle	GO:0043232	0.000018240735838856964	4303	422	151	17694	NOM1,PLEC,BRD8,NR3C1,TCF7L2,LMNB1,SPECC1L,IQGAP1,SYCP2,UTP25,STAU2,ATM,ASPM,HMMR,FMN1,SHTN1,AKAP8,NOC3L,DIAPH3,LOC119871705,NVL,LOC119870566,ARHGAP35,TRAF5,CENPE,LOC607206,CENPF,EPB41,ATAD5,PRKDC,ETV6,RAB8A,PPAN,POLD2,AKAP9,CEP135,MPHOSPH8,JAK2,ACTN1,MTBP,ATRX,CENPJ,CEP295,BAZ1B,KIF20B,TAF4B,FTSJ3,CEP290,NOP14,DCAF13,GIGYF2,CEP89,RAD50,ZFP36,UPF2,KIF13B,RIF1,SMC4,SKP1,SPART,THOC2,IMP3,THOC1,PIBF1…
GO:CC	non-membrane-bounded organelle	GO:0043228	0.000018528578813811635	4304	422	151	17694	NOM1,PLEC,BRD8,NR3C1,TCF7L2,LMNB1,SPECC1L,IQGAP1,SYCP2,UTP25,STAU2,ATM,ASPM,HMMR,FMN1,SHTN1,AKAP8,NOC3L,DIAPH3,LOC119871705,NVL,LOC119870566,ARHGAP35,TRAF5,CENPE,LOC607206,CENPF,EPB41,ATAD5,PRKDC,ETV6,RAB8A,PPAN,POLD2,AKAP9,CEP135,MPHOSPH8,JAK2,ACTN1,MTBP,ATRX,CENPJ,CEP295,BAZ1B,KIF20B,TAF4B,FTSJ3,CEP290,NOP14,DCAF13,GIGYF2,CEP89,RAD50,ZFP36,UPF2,KIF13B,RIF1,SMC4,SKP1,SPART,THOC2,IMP3,THOC1,PIBF1…
GO:CC	midbody	GO:0030496	0.00004120275412954027	140	306	14	17694	IQGAP1,ASPM,CENPE,CENPF,MITD1,KIF20B,SPART,CENPC,GNL3,CCDC66,PKN2,HSP90B1,GNAI2,CYLD
GO:CC	centrosome	GO:0005813	0.00004908177050428122	513	498	37	17694	NR3C1,ATM,HMMR,TRAF5,CENPF,AKAP9,CEP135,CEP295,KIF20B,CEP290,DCAF13,CEP89,SKP1,PIBF1,DYNC1H1,CCDC66,PKN2,CEP152,PCNT,RBBP6,GNAI2,RAD18,RABL6,CYLD,ITSN2,PIK3R5,PPP1R12A,CEP350,CIR1,CEP120,APC,RBM39,IFT20,RAB11A,ARL2BP,TNKS2,DPF2
GO:CC	spindle	GO:0005819	0.0001014050266190367	258	152	13	17694	NR3C1,SPECC1L,ATM,ASPM,HMMR,DIAPH3,CENPE,CENPF,EPB41,CEP295,KIF20B,CEP89,RIF1
GO:CC	cytosol	GO:0005829	0.00010724396737908485	2539	551	122	17694	PLEC,NR3C1,PLCE1,TNFRSF11A,TNRC18,THEM4,HMMR,CBLB,TRAF5,CENPF,EPB41,EHBP1,ETV6,APBB1IP,CIP2A,MPHOSPH8,BTF3,CEP295,ZC3HAV1,KIF20B,CEP290,PPIG,LGALS8,DTX3L,DCAF13,GIGYF2,CEP89,ZFP36,UPF2,SCAPER,SMC4,SKP1,SPART,PTEN,ANKRD11,MTR,INO80,BRWD1,ARID4B,VPS13C,ANKRD12,PRRC2C,CCDC66,ACIN1,RARS1,ADAM17,DNAJC2,PKN2,NOP58,SYK,HSP90B1,PCNT,EFTUD2,TELO2,PNISR,CWC22,LARP7,AGO2,PIK3R1,GNAI2,SNRNP48,CHD9,NMT1,ETAA1…
GO:CC	chromosomal region	GO:0098687	0.00033297124681013157	235	185	13	17694	ATM,CENPE,CENPF,MTBP,ATRX,BAZ1B,RAD50,RIF1,SMC4,THOC2,THOC1,SMC6,CENPC
GO:CC	chromosome	GO:0005694	0.0003631988587923783	969	422	48	17694	BRD8,TCF7L2,SYCP2,ATM,AKAP8,CENPE,CENPF,ATAD5,PRKDC,POLD2,MPHOSPH8,MTBP,ATRX,BAZ1B,FTSJ3,RAD50,RIF1,SMC4,THOC2,THOC1,SMC6,INO80,CENPC,GNL3,SMARCA4,SETD5,SUZ12,CHD1,ETAA1,RAD18,DNMT3A,NIPBL,FAAP100,SMARCC1,KMT2E,PPP1R12A,TIPIN,MUS81,BPTF,SLX1A,ANP32E,CDC5L,ANKRD17,APC,SETX,OGT,RFC1,DDX21
GO:CC	catalytic complex	GO:1902494	0.0004194686083139119	1291	589	75	17694	BRD8,ATM,CYBB,CDC73,NVL,ATAD5,PRKDC,POLD2,SPCS2,BAZ1B,TAF4B,DCAF13,BOD1L1,ZFC3H1,SKP1,MLEC,SMC6,INO80,DYNC1H1,RARS1,SRRM1,SMARCA4,CRCP,GTF2F1,EFTUD2,CWC22,SUZ12,AGO2,PIK3R1,DIS3,TOPORS,DNMT3A,TAF3,CWC25,DNTTIP2,SMARCC1,PRPF6,MGA,PIK3R5,CCNH,RB1CC1,PSMC5,PPP1R12A,PNN,MUS81,BPTF,CRNKL1,ANP32E,CDC5L,PSMD11,APC,EP400,OGT,RFC1,DDX21,PRPF4B,SNX4,ANAPC16,CLNS1A,YPEL5,PIGH,AEBP2,CBX4,TAF12,PPP2CB,DYNLRB1…
GO:CC	cytoskeleton	GO:0005856	0.0007954590577560464	1586	261	47	17694	PLEC,NR3C1,LMNB1,SPECC1L,IQGAP1,STAU2,ATM,ASPM,HMMR,FMN1,SHTN1,DIAPH3,ARHGAP35,TRAF5,CENPE,LOC607206,CENPF,EPB41,RAB8A,AKAP9,CEP135,JAK2,ACTN1,CENPJ,CEP295,KIF20B,CEP290,DCAF13,CEP89,KIF13B,RIF1,SKP1,PIBF1,SMC6,DYNC1H1,CCDC66,GLG1,ADAM17,LOC102152706,PKN2,MAP7D3,CEP152,PCNT,ROCK1,SYNE2,RBBP6,GNAI2
GO:CC	centriole	GO:0005814	0.003299467601084631	106	592	14	17694	CEP135,CENPJ,CEP295,CEP290,CEP89,CEP152,PCNT,TOPORS,CEP350,CEP120,IFT20,RAB11A,RP2,CCDC92
GO:CC	polymeric cytoskeletal fiber	GO:0099513	0.003822565817209952	426	76	10	17694	PLEC,LMNB1,IQGAP1,STAU2,ASPM,FMN1,SHTN1,DIAPH3,CENPE,LOC607206
GO:CC	condensed chromosome	GO:0000793	0.007855318890185132	187	185	10	17694	AKAP8,CENPE,CENPF,MTBP,ATRX,BAZ1B,RIF1,SMC4,SMC6,CENPC
GO:CC	chromosome, telomeric region	GO:0000781	0.008008005197220528	87	179	7	17694	ATM,ATRX,RAD50,RIF1,THOC2,THOC1,SMC6
GO:CC	catalytic step 2 spliceosome	GO:0071013	0.019509789102885845	58	425	8	17694	SRRM1,EFTUD2,CWC22,PRPF6,PNN,CRNKL1,CDC5L,PRPF4B
GO:CC	preribosome	GO:0030684	0.030835270039806666	61	319	7	17694	PRKDC,FTSJ3,NOP14,NOP58,UTP3,MPHOSPH10,UTP20
GO:CC	supramolecular fiber	GO:0099512	0.042230426168375766	567	76	10	17694	PLEC,LMNB1,IQGAP1,STAU2,ASPM,FMN1,SHTN1,DIAPH3,CENPE,LOC607206
GO:CC	supramolecular complex	GO:0099080	0.0436381714280779	802	150	18	17694	PLEC,LMNB1,IQGAP1,STAU2,ASPM,FMN1,SHTN1,DIAPH3,CENPE,LOC607206,CENPF,ACTN1,MTBP,CEP295,GIGYF2,ZFP36,UPF2,KIF13B
GO:CC	supramolecular polymer	GO:0099081	0.046655454060777604	574	76	10	17694	PLEC,LMNB1,IQGAP1,STAU2,ASPM,FMN1,SHTN1,DIAPH3,CENPE,LOC607206
GO:CC	pronucleus	GO:0045120	0.04687597016379478	13	152	3	17694	AKAP8,CENPF,RIF1

## Sheet: 3vs2b up
g:Pofiler 08.09.24, 3 vs. 2b up
source	term_name	term_id	adjusted_p_value	term_size	query_size	intersection_size	effective_domain_size	intersections
GO:MF	chondroitin sulfate proteoglycan binding	GO:0035373	0.04041060406584476	1	2	1	16834	PTPRF
GO:BP	regulation of catabolic process	GO:0009894	0.003081968934700578	642	41	10	17277	E2F1,KAT8,RAD23A,JMJD8,LARP1,SCARB1,LOC607300,FAF1,PSMD3,CCNY
GO:CC	NSL complex	GO:0044545	0.03372628305063863	8	45	2	17694	KAT8,MCRS1

## Sheet: 3vs2b down
g:Pofiler 08.09.24, 3 vs. 2b down
no results

## Sheet: 3vs2b total
g:Pofiler 08.09.24, 3 vs. 2b total
source	term_name	term_id	adjusted_p_value	term_size	query_size	intersection_size	effective_domain_size	intersections
GO:MF	apolipoprotein A-I binding	GO:0034186	0.00722463882763983	2	67	2	16834	SCARB1,ABCA1
GO:MF	enzyme binding	GO:0019899	0.04485178720557598	1358	49	13	16834	ZNF346,SHC1,HSPB1,KAT8,CNPPD1,RAD23A,FMNL1,PCIF1,FAF1,CCNY,CDK2AP2,NDUFS2,DOCK11
GO:BP	regulation of catabolic process	GO:0009894	0.002982550581968301	642	41	10	17277	E2F1,KAT8,RAD23A,JMJD8,LARP1,SCARB1,LOC607300,FAF1,PSMD3,CCNY
GO:CC	NSL complex	GO:0044545	0.04059645182021317	8	45	2	17694	KAT8,MCRS1

## Sheet: 2avs1 up GO
Gene ontology 08.09.24, 2a vs. 1 up
Analysis Type:	PANTHER Overrepresentation Test (Released 20240807)
Annotation Version and Release Date:	GO Ontology database DOI: 10.5281/zenodo.12173881 Released 2024-06-17
Analyzed List:	upload_1 (Canis lupus familiaris)
Reference List:	Canis lupus familiaris (all genes in database)
Test Type:	FISHER
Correction:	FDR
GO biological process complete	Canis lupus familiaris - REFLIST (20969)	upload_1 (raw P-value)	upload_1 (FDR)
DNA clamp unloading (GO:0090618)	2	4.22E-04	3.06E-02
'de novo' cotranslational protein folding (GO:0051083)	2	4.22E-04	3.04E-02
mitochondrial translational initiation (GO:0070124)	2	4.22E-04	3.03E-02
positive regulation of protein localization to early endosome (GO:1902966)	7	2.84E-04	2.22E-02
regulation of protein localization to early endosome (GO:1902965)	7	2.84E-04	2.21E-02
meiotic spindle assembly (GO:0090306)	8	4.47E-04	3.16E-02
positive regulation of neuron migration (GO:2001224)	11	5.18E-05	5.08E-03
peptide antigen assembly with MHC protein complex (GO:0002501)	12	7.64E-05	7.17E-03
MHC protein complex assembly (GO:0002396)	12	7.64E-05	7.12E-03
mitotic G1 DNA damage checkpoint signaling (GO:0031571)	13	1.09E-04	9.52E-03
mitotic G1/S transition checkpoint signaling (GO:0044819)	14	1.50E-04	1.28E-02
meiotic spindle organization (GO:0000212)	15	2.01E-04	1.64E-02
stress granule assembly (GO:0034063)	16	2.63E-04	2.10E-02
antigen processing and presentation of peptide antigen via MHC class I (GO:0002474)	16	2.63E-04	2.08E-02
DNA-templated transcription termination (GO:0006353)	18	4.28E-04	3.06E-02
regulatory ncRNA-mediated post-transcriptional gene silencing (GO:0035194)	18	4.28E-04	3.04E-02
mRNA splice site recognition (GO:0006376)	23	8.88E-05	8.11E-03
post-transcriptional gene silencing (GO:0016441)	23	8.88E-05	8.05E-03
nuclear migration (GO:0007097)	20	6.57E-04	4.25E-02
cellular response to glucocorticoid stimulus (GO:0071385)	20	6.57E-04	4.23E-02
maturation of SSU-rRNA (GO:0030490)	41	1.81E-05	1.95E-03
ribosomal small subunit biogenesis (GO:0042274)	83	1.42E-09	3.51E-07
positive regulation of DNA-templated transcription initiation (GO:2000144)	36	8.41E-05	7.73E-03
positive regulation of G1/S transition of mitotic cell cycle (GO:1900087)	30	3.34E-04	2.51E-02
replication fork processing (GO:0031297)	37	9.87E-05	8.76E-03
antigen processing and presentation of peptide antigen (GO:0048002)	33	5.29E-04	3.60E-02
DNA-templated DNA replication maintenance of fidelity (GO:0045005)	41	1.78E-04	1.49E-02
spliceosomal complex assembly (GO:0000245)	41	1.78E-04	1.48E-02
negative regulation of G1/S transition of mitotic cell cycle (GO:2000134)	35	7.00E-04	4.46E-02
mitotic DNA damage checkpoint signaling (GO:0044773)	59	2.64E-05	2.78E-03
regulation of DNA-templated transcription initiation (GO:2000142)	45	3.01E-04	2.31E-02
regulation of G1/S transition of mitotic cell cycle (GO:2000045)	83	1.04E-06	1.44E-04
telomere organization (GO:0032200)	68	1.02E-05	1.12E-03
DNA damage checkpoint signaling (GO:0000077)	76	3.45E-06	4.40E-04
signal transduction in response to DNA damage (GO:0042770)	100	1.37E-07	2.31E-05
mitotic DNA integrity checkpoint signaling (GO:0044774)	62	3.82E-05	3.86E-03
telomere maintenance (GO:0000723)	64	4.83E-05	4.80E-03
DNA integrity checkpoint signaling (GO:0031570)	83	7.74E-06	8.92E-04
maintenance of location in cell (GO:0051651)	59	2.00E-04	1.65E-02
positive regulation of telomere maintenance (GO:0032206)	51	6.00E-04	3.94E-02
regulation of mRNA processing (GO:0050684)	95	4.04E-06	5.05E-04
regulation of cell cycle G1/S phase transition (GO:1902806)	95	4.04E-06	5.00E-04
DNA-templated DNA replication (GO:0006261)	103	8.90E-06	1.01E-03
regulation of cell-matrix adhesion (GO:0001952)	70	5.80E-04	3.85E-02
post-embryonic development (GO:0009791)	70	5.80E-04	3.83E-02
regulation of mRNA splicing, via spliceosome (GO:0048024)	81	2.59E-04	2.07E-02
regulation of mRNA metabolic process (GO:1903311)	214	3.71E-09	8.55E-07
cellular response to steroid hormone stimulus (GO:0071383)	73	7.48E-04	4.64E-02
mitotic cell cycle checkpoint signaling (GO:0007093)	94	1.37E-04	1.18E-02
protein-RNA complex assembly (GO:0022618)	157	9.02E-07	1.26E-04
DNA replication (GO:0006260)	137	5.19E-06	6.37E-04
rRNA processing (GO:0006364)	169	4.43E-07	6.69E-05
regulation of telomere maintenance (GO:0032204)	74	8.12E-04	5.01E-02
non-membrane-bounded organelle assembly (GO:0140694)	254	6.09E-10	1.60E-07
RNA localization (GO:0006403)	106	6.66E-05	6.39E-03
positive regulation of mRNA metabolic process (GO:1903313)	85	3.61E-04	2.66E-02
cell cycle checkpoint signaling (GO:0000075)	117	3.00E-05	3.12E-03
mRNA processing (GO:0006397)	326	8.11E-12	2.54E-09
DNA-templated transcription initiation (GO:0006352)	99	2.04E-04	1.65E-02
mRNA splicing, via spliceosome (GO:0000398)	221	3.46E-08	6.88E-06
RNA splicing, via transesterification reactions with bulged adenosine as nucleophile (GO:0000377)	221	3.46E-08	6.78E-06
RNA splicing, via transesterification reactions (GO:0000375)	221	3.46E-08	6.68E-06
rRNA metabolic process (GO:0016072)	189	4.03E-07	6.23E-05
protein-RNA complex organization (GO:0071826)	167	1.97E-06	2.64E-04
mRNA metabolic process (GO:0016071)	449	6.78E-15	3.56E-12
ribonucleoprotein complex biogenesis (GO:0022613)	375	2.43E-12	8.19E-10
positive regulation of cell cycle process (GO:0090068)	160	5.87E-06	7.07E-04
RNA splicing (GO:0008380)	275	3.01E-09	7.20E-07
regulation of extrinsic apoptotic signaling pathway (GO:2001236)	105	3.17E-04	2.41E-02
regulation of protein kinase activity (GO:0045859)	106	3.41E-04	2.54E-02
regulation of mitotic cell cycle phase transition (GO:1901990)	213	4.66E-07	6.96E-05
regulation of mRNA stability (GO:0043488)	119	1.76E-04	1.48E-02
double-strand break repair via homologous recombination (GO:0000724)	96	8.17E-04	5.02E-02
regulation of mRNA catabolic process (GO:0061013)	132	9.08E-05	8.17E-03
regulation of RNA splicing (GO:0043484)	123	2.30E-04	1.86E-02
ribosome biogenesis (GO:0042254)	260	1.12E-07	1.96E-05
negative regulation of cell cycle process (GO:0010948)	188	8.49E-06	9.70E-04
regulation of cell cycle phase transition (GO:1901987)	276	7.03E-08	1.27E-05
regulation of RNA stability (GO:0043487)	128	3.18E-04	2.40E-02
chromatin remodeling (GO:0006338)	474	4.02E-12	1.29E-09
transcription by RNA polymerase II (GO:0006366)	246	8.90E-07	1.26E-04
negative regulation of cell cycle phase transition (GO:1901988)	156	9.54E-05	8.53E-03
positive regulation of DNA metabolic process (GO:0051054)	157	1.01E-04	8.95E-03
spindle organization (GO:0007051)	118	7.48E-04	4.66E-02
RNA processing (GO:0006396)	699	2.11E-16	1.39E-13
protein-DNA complex organization (GO:0071824)	598	6.09E-14	2.76E-11
regulation of mitotic cell cycle (GO:0007346)	321	6.03E-08	1.12E-05
RNA biosynthetic process (GO:0032774)	1033	3.31E-23	1.45E-19
DNA-templated transcription (GO:0006351)	349	1.81E-08	3.66E-06
chromatin organization (GO:0006325)	552	1.30E-12	4.76E-10
positive regulation of cell cycle (GO:0045787)	202	2.00E-05	2.12E-03
regulation of chromosome organization (GO:0033044)	164	1.53E-04	1.31E-02
positive regulation of immune effector process (GO:0002699)	137	5.47E-04	3.68E-02
nucleic acid biosynthetic process (GO:0141187)	1087	4.02E-23	1.32E-19
negative regulation of mitotic cell cycle (GO:0045930)	154	3.53E-04	2.62E-02
regulation of translation (GO:0006417)	254	5.80E-06	7.06E-04
RNA metabolic process (GO:0016070)	1173	1.51E-23	9.91E-20
double-strand break repair (GO:0006302)	176	2.96E-04	2.29E-02
epigenetic regulation of gene expression (GO:0040029)	162	5.42E-04	3.67E-02
regulation of cell cycle process (GO:0010564)	474	4.46E-09	1.01E-06
nucleic acid metabolic process (GO:0090304)	1630	6.03E-28	7.92E-24
positive regulation of lymphocyte activation (GO:0051251)	185	4.65E-04	3.25E-02
myeloid cell differentiation (GO:0030099)	185	4.65E-04	3.23E-02
DNA damage response (GO:0006974)	556	1.43E-09	3.48E-07
post-transcriptional regulation of gene expression (GO:0010608)	360	1.79E-06	2.42E-04
negative regulation of cell cycle (GO:0045786)	239	1.36E-04	1.19E-02
regulation of DNA metabolic process (GO:0051052)	279	7.17E-05	6.82E-03
nucleobase-containing compound biosynthetic process (GO:0034654)	1339	9.39E-19	1.03E-15
cell cycle process (GO:0022402)	654	9.65E-09	2.01E-06
DNA metabolic process (GO:0006259)	528	5.89E-07	8.60E-05
peptidyl-amino acid modification (GO:0018193)	264	3.98E-04	2.91E-02
regulation of lymphocyte activation (GO:0051249)	301	1.79E-04	1.48E-02
mitotic cell cycle process (GO:1903047)	375	3.64E-05	3.77E-03
positive regulation of molecular function (GO:0044093)	286	3.06E-04	2.34E-02
organelle assembly (GO:0070925)	643	1.85E-07	3.04E-05
regulation of cell cycle (GO:0051726)	699	5.57E-08	1.06E-05
cell cycle (GO:0007049)	700	5.78E-08	1.09E-05
nucleobase-containing compound metabolic process (GO:0006139)	2099	2.50E-22	6.58E-19
positive regulation of nucleobase-containing compound metabolic process (GO:0045935)	1369	1.42E-13	5.84E-11
positive regulation of RNA metabolic process (GO:0051254)	1246	3.77E-12	1.24E-09
gene expression (GO:0010467)	2085	6.94E-20	1.14E-16
mitotic cell cycle (GO:0000278)	427	8.23E-05	7.62E-03
microtubule cytoskeleton organization (GO:0000226)	447	5.82E-05	5.66E-03
hemopoiesis (GO:0030097)	447	5.82E-05	5.62E-03
positive regulation of DNA-templated transcription (GO:0045893)	1160	1.33E-10	3.72E-08
positive regulation of RNA biosynthetic process (GO:1902680)	1161	1.37E-10	3.74E-08
regulation of leukocyte activation (GO:0002694)	336	6.36E-04	4.14E-02
DNA repair (GO:0006281)	358	4.79E-04	3.32E-02
positive regulation of macromolecule biosynthetic process (GO:0010557)	1714	1.90E-14	8.94E-12
positive regulation of cellular biosynthetic process (GO:0031328)	1745	1.70E-14	8.27E-12
positive regulation of biosynthetic process (GO:0009891)	1770	1.31E-14	6.62E-12
microtubule-based process (GO:0007017)	658	7.73E-06	8.98E-04
positive regulation of transcription by RNA polymerase II (GO:0045944)	867	2.71E-07	4.29E-05
positive regulation of macromolecule metabolic process (GO:0010604)	2198	2.52E-17	1.74E-14
response to hormone (GO:0009725)	394	8.20E-04	4.99E-02
protein-containing complex organization (GO:0043933)	1416	4.75E-11	1.39E-08
positive regulation of cellular metabolic process (GO:0031325)	2055	3.77E-15	2.06E-12
negative regulation of protein metabolic process (GO:0051248)	426	6.99E-04	4.48E-02
macromolecule biosynthetic process (GO:0009059)	2455	7.26E-18	5.96E-15
positive regulation of protein metabolic process (GO:0051247)	672	3.71E-05	3.81E-03
regulation of cell adhesion (GO:0030155)	482	4.89E-04	3.36E-02
regulation of molecular function (GO:0065009)	527	2.74E-04	2.16E-02
positive regulation of metabolic process (GO:0009893)	2416	1.20E-15	7.52E-13
positive regulation of gene expression (GO:0010628)	755	1.96E-05	2.10E-03
negative regulation of nucleobase-containing compound metabolic process (GO:0045934)	1027	7.19E-07	1.03E-04
negative regulation of RNA metabolic process (GO:0051253)	942	2.72E-06	3.51E-04
response to cytokine (GO:0034097)	516	7.01E-04	4.45E-02
response to peptide (GO:1901652)	517	7.09E-04	4.46E-02
regulation of nucleobase-containing compound metabolic process (GO:0019219)	2811	9.04E-18	6.99E-15
negative regulation of RNA biosynthetic process (GO:1902679)	878	7.41E-06	8.78E-04
regulation of protein metabolic process (GO:0051246)	1225	1.17E-07	2.00E-05
negative regulation of transcription by RNA polymerase II (GO:0000122)	637	1.68E-04	1.43E-02
regulation of RNA metabolic process (GO:0051252)	2608	1.87E-15	1.11E-12
negative regulation of DNA-templated transcription (GO:0045892)	873	1.39E-05	1.50E-03
positive regulation of immune system process (GO:0002684)	605	3.96E-04	2.91E-02
positive regulation of multicellular organismal process (GO:0051240)	979	7.57E-06	8.89E-04
negative regulation of macromolecule metabolic process (GO:0010605)	1729	1.39E-09	3.58E-07
negative regulation of cellular metabolic process (GO:0031324)	1614	7.30E-09	1.57E-06
negative regulation of macromolecule biosynthetic process (GO:0010558)	1407	8.11E-08	1.44E-05
regulation of cellular localization (GO:0060341)	590	6.18E-04	4.04E-02
cellular biosynthetic process (GO:0044249)	2861	2.43E-15	1.39E-12
negative regulation of cellular biosynthetic process (GO:0031327)	1428	1.14E-07	1.97E-05
negative regulation of biosynthetic process (GO:0009890)	1435	1.90E-07	3.07E-05
regulation of gene expression (GO:0010468)	3511	2.16E-18	2.03E-15
regulation of macromolecule biosynthetic process (GO:0010556)	3580	2.13E-18	2.16E-15
cellular component biogenesis (GO:0044085)	1943	1.39E-09	3.51E-07
negative regulation of metabolic process (GO:0009892)	1847	4.60E-09	1.02E-06
cellular response to stress (GO:0033554)	1096	9.43E-06	1.06E-03
cytoskeleton organization (GO:0007010)	950	5.03E-05	4.97E-03
regulation of primary metabolic process (GO:0080090)	3863	2.09E-19	3.05E-16
regulation of catabolic process (GO:0009894)	661	7.04E-04	4.45E-02
regulation of cellular biosynthetic process (GO:0031326)	3630	6.76E-18	5.92E-15
negative regulation of gene expression (GO:0010629)	663	7.28E-04	4.55E-02
regulation of RNA biosynthetic process (GO:2001141)	2415	2.53E-11	7.56E-09
regulation of biosynthetic process (GO:0009889)	3672	9.08E-18	6.63E-15
regulation of macromolecule metabolic process (GO:0060255)	4243	1.23E-20	2.69E-17
regulation of transcription by RNA polymerase II (GO:0006357)	1861	1.51E-08	3.11E-06
regulation of DNA-templated transcription (GO:0006355)	2408	6.43E-11	1.84E-08
regulation of organelle organization (GO:0033043)	804	5.01E-04	3.43E-02
regulation of cellular metabolic process (GO:0031323)	4137	6.53E-19	8.58E-16
macromolecule metabolic process (GO:0043170)	4531	3.92E-20	7.36E-17
regulation of apoptotic process (GO:0042981)	849	4.65E-04	3.26E-02
regulation of programmed cell death (GO:0043067)	881	5.63E-04	3.76E-02
biosynthetic process (GO:0009058)	3275	1.34E-12	4.76E-10
regulation of metabolic process (GO:0019222)	4614	7.24E-19	8.65E-16
cellular component assembly (GO:0022607)	1732	2.09E-06	2.72E-04
positive regulation of cellular process (GO:0048522)	3739	1.11E-13	4.69E-11
positive regulation of biological process (GO:0048518)	4134	1.44E-13	5.75E-11
cellular component organization or biogenesis (GO:0071840)	4385	7.93E-14	3.47E-11
negative regulation of cellular process (GO:0048523)	3175	8.09E-09	1.71E-06
organelle organization (GO:0006996)	2325	3.89E-06	4.91E-04
negative regulation of biological process (GO:0048519)	3465	5.58E-09	1.22E-06
cellular component organization (GO:0016043)	4191	1.60E-10	4.29E-08
regulation of developmental process (GO:0050793)	1480	5.61E-04	3.76E-02
response to stress (GO:0006950)	2078	3.99E-05	4.00E-03
cellular metabolic process (GO:0044237)	4530	3.46E-09	8.12E-07
primary metabolic process (GO:0044238)	5689	2.22E-11	6.80E-09
metabolic process (GO:0008152)	6475	2.25E-12	7.78E-10
regulation of response to stimulus (GO:0048583)	2586	8.19E-04	5.01E-02
regulation of cellular process (GO:0050794)	8823	6.58E-08	1.20E-05
regulation of biological process (GO:0050789)	9321	1.39E-07	2.31E-05
biological regulation (GO:0065007)	9678	4.41E-07	6.74E-05
biological_process (GO:0008150)	15981	1.16E-12	4.47E-10
cellular process (GO:0009987)	13003	9.50E-06	1.06E-03
Unclassified (UNCLASSIFIED)	4988	1.16E-12	4.34E-10
system process (GO:0003008)	1652	1.18E-05	1.29E-03
nervous system process (GO:0050877)	1318	7.50E-05	7.09E-03
G protein-coupled receptor signaling pathway (GO:0007186)	1387	1.77E-06	2.42E-04
sensory perception (GO:0007600)	1022	3.76E-05	3.83E-03
sensory perception of smell (GO:0007608)	721	6.61E-06	7.89E-04
detection of stimulus involved in sensory perception (GO:0050906)	780	2.09E-06	2.77E-04
sensory perception of chemical stimulus (GO:0007606)	780	2.09E-06	2.74E-04
detection of stimulus (GO:0051606)	840	6.57E-07	9.49E-05
detection of chemical stimulus involved in sensory perception of smell (GO:0050911)	704	5.42E-07	8.01E-05
detection of chemical stimulus involved in sensory perception (GO:0050907)	736	3.82E-07	5.98E-05
detection of chemical stimulus (GO:0009593)	755	2.57E-07	4.11E-05

## Sheet: 2avs1 down GO
Gene ontology 08.09.24, 2a vs. 1 down
Analysis Type:	PANTHER Overrepresentation Test (Released 20240807)
Annotation Version and Release Date:	GO Ontology database DOI: 10.5281/zenodo.12173881 Released 2024-06-17
Analyzed List:	upload_1 (Canis lupus familiaris)
Reference List:	Canis lupus familiaris (all genes in database)
Test Type:	FISHER
Correction:	FDR
GO biological process complete	Canis lupus familiaris - REFLIST (20969)	upload_1 (raw P-value)	upload_1 (FDR)
negative regulation of cilium assembly (GO:1902018)	16	1.91E-05	5.02E-02
regulation of cilium assembly (GO:1902017)	57	2.82E-05	4.63E-02
wound healing (GO:0042060)	184	2.47E-05	5.42E-02
nitrogen compound transport (GO:0071705)	1092	1.07E-05	7.01E-02
protein localization (GO:0008104)	1384	1.24E-05	5.42E-02
cellular macromolecule localization (GO:0070727)	1390	1.28E-05	4.20E-02
macromolecule localization (GO:0033036)	1719	4.65E-06	6.11E-02
sensory perception (GO:0007600)	1022	2.58E-05	4.84E-02

[truncated: 2 more sheets: 2avs1 total GO, 3vs2b total GO]
